# Supplementary material for: Polycomb- and REST-associated histone deacetylases are independent pathways toward a mature neuronal phenotype
Source: eLife. 2014 Sep 24;3:e04235. doi: 10.7554/eLife.04235 (PMC4371837; doi:10.7554/eLife.04235)
Supplement: Table 1—Source data 1. — Columns list the chromosome and base pair coordinates (Region Start & Region End) of the REST-binding domain identified by PeakRanger analysis of ChIP-Seq read distribution. RE1 Start and RE1 End columns give the coordinates corresponding to the positions of individual RE1 motifs found by FIMO within the corresponding region. Orientation column lists whether the RE1 motif is on the forward (+) or reverse (−) DNA strand, and the p-value column gives the calculated log-odds score from the comparison of a discovered motif to a position weighted matrix corresponding to the full consensus RE1 motif. DOI: http://dx.doi.org/10.7554/eLife.04235.004 [file elife04235s001.xlsx]

## Sheet: Sheet1
Chromosome	Region Start	Region End	Rank	Chromosome	RE1 Start	RE1 End	Orientation	P-value	Number of RE1 sites in REST Region
chr4	139814837	139815338	1	chr4	139815005	139815019	+	1.87e-05	13
chr4	139814837	139815338	1	chr4	139814931	139814945	+	0.000432	13
chr4	139814837	139815338	1	chr4	139814860	139814874	-	0.000539	13
chr4	139814837	139815338	1	chr4	139814956	139814970	+	0.000126	13
chr4	139814837	139815338	1	chr4	139814980	139814994	+	1.96e-06	13
chr4	139814837	139815338	1	chr4	139815168	139815182	+	1.96e-06	13
chr4	139814837	139815338	1	chr4	139815036	139815050	+	9.83e-06	13
chr4	139814837	139815338	1	chr4	139815142	139815156	+	2.5e-05	13
chr4	139814837	139815338	1	chr4	139815061	139815075	+	8.66e-05	13
chr4	139814837	139815338	1	chr4	139815135	139815149	-	0.000356	13
chr4	139814837	139815338	1	chr4	139815086	139815100	+	9.83e-06	13
chr4	139814837	139815338	1	chr4	139815111	139815125	+	5.73e-05	13
chr4	139814837	139815338	1	chr4	139815315	139815329	-	0.000121	13
chr8	14072522	14072962	2	chr8	14072837	14072851	-	0.000229	9
chr8	14072522	14072962	2	chr8	14072641	14072655	-	4.05e-05	9
chr8	14072522	14072962	2	chr8	14072672	14072686	-	3.82e-06	9
chr8	14072522	14072962	2	chr8	14072692	14072706	-	2.65e-05	9
chr8	14072522	14072962	2	chr8	14072764	14072778	-	0.000649	9
chr8	14072522	14072962	2	chr8	14072734	14072748	-	3.82e-06	9
chr8	14072522	14072962	2	chr8	14072722	14072736	-	0.000649	9
chr8	14072522	14072962	2	chr8	14072776	14072790	-	3.82e-06	9
chr8	14072522	14072962	2	chr8	14072906	14072920	+	0.000691	9
chr4	150978588	150979473	3	chr4	150978902	150978916	+	1.12e-06	10
chr4	150978588	150979473	3	chr4	150978794	150978808	+	2.14e-06	10
chr4	150978588	150979473	3	chr4	150978729	150978743	+	8.57e-06	10
chr4	150978588	150979473	3	chr4	150978695	150978709	+	2.34e-06	10
chr4	150978588	150979473	3	chr4	150978762	150978776	+	0.000131	10
chr4	150978588	150979473	3	chr4	150978857	150978871	+	1.87e-05	10
chr4	150978588	150979473	3	chr4	150979203	150979217	+	0.000539	10
chr4	150978588	150979473	3	chr4	150979110	150979124	+	5.2e-05	10
chr4	150978588	150979473	3	chr4	150979236	150979250	+	3.65e-05	10
chr4	150978588	150979473	3	chr4	150979259	150979273	+	0.000883	10
chr18	25826573	25827018	4	chr18	25826745	25826759	+	0.000379	4
chr18	25826573	25827018	4	chr18	25826733	25826747	+	0.000153	4
chr18	25826573	25827018	4	chr18	25826831	25826845	+	0.000475	4
chr18	25826573	25827018	4	chr18	25826819	25826833	+	0.000649	4
chr7	6362742	6363231	5	chr7	6362878	6362892	-	2.95e-05	6
chr7	6362742	6363231	5	chr7	6363065	6363079	-	0.000781	6
chr7	6362742	6363231	5	chr7	6362991	6363005	-	0.000805	6
chr7	6362742	6363231	5	chr7	6363025	6363039	+	0.000968	6
chr7	6362742	6363231	5	chr7	6363021	6363035	-	0.000344	6
chr7	6362742	6363231	5	chr7	6363137	6363151	-	3.84e-05	6
chr4	152173520	152173993	6	chr4	152173824	152173838	-	8.98e-08	11
chr4	152173520	152173993	6	chr4	152173582	152173596	-	0.000312	11
chr4	152173520	152173993	6	chr4	152173529	152173543	+	0.00046	11
chr4	152173520	152173993	6	chr4	152173711	152173725	-	8.98e-08	11
chr4	152173520	152173993	6	chr4	152173673	152173687	-	8.66e-05	11
chr4	152173520	152173993	6	chr4	152173628	152173642	-	0.000141	11
chr4	152173520	152173993	6	chr4	152173650	152173664	-	1.49e-06	11
chr4	152173520	152173993	6	chr4	152173689	152173703	-	0.00061	11
chr4	152173520	152173993	6	chr4	152173801	152173815	-	8.98e-08	11
chr4	152173520	152173993	6	chr4	152173758	152173772	-	8.02e-06	11
chr4	152173520	152173993	6	chr4	152173865	152173879	+	0.000734	11
chr15	84659848	84660287	7	chr15	84660068	84660082	+	2.23e-05	5
chr15	84659848	84660287	7	chr15	84660024	84660038	+	1.12e-05	5
chr15	84659848	84660287	7	chr15	84659988	84660002	-	4.26e-05	5
chr15	84659848	84660287	7	chr15	84659973	84659987	+	6.92e-05	5
chr15	84659848	84660287	7	chr15	84660036	84660050	+	0.000712	5
chr15	77950175	77950610	8	chr15	77950503	77950517	+	0.000805	6
chr15	77950175	77950610	8	chr15	77950336	77950350	-	2.78e-07	6
chr15	77950175	77950610	8	chr15	77950280	77950294	-	4.05e-05	6
chr15	77950175	77950610	8	chr15	77950392	77950406	-	1.12e-06	6
chr15	77950175	77950610	8	chr15	77950446	77950460	-	0.000121	6
chr15	77950175	77950610	8	chr15	77950518	77950532	+	0.000998	6
chr19	4988996	4989523	9	chr19	4989167	4989181	-	5.6e-06	6
chr19	4988996	4989523	9	chr19	4989128	4989142	-	9.83e-06	6
chr19	4988996	4989523	9	chr19	4989135	4989149	+	0.000116	6
chr19	4988996	4989523	9	chr19	4989246	4989260	-	7.24e-05	6
chr19	4988996	4989523	9	chr19	4989210	4989224	-	0.000691	6
chr19	4988996	4989523	9	chr19	4989299	4989313	+	0.000998	6
chr14	64300375	64300771	10	chr14	64300463	64300477	-	3e-06	3
chr14	64300375	64300771	10	chr14	64300527	64300541	-	3e-06	3
chr14	64300375	64300771	10	chr14	64300592	64300606	-	3e-06	3
chr15	72398993	72399408	11	chr15	72399134	72399148	+	2.2e-07	5
chr15	72398993	72399408	11	chr15	72399086	72399100	+	0.000103	5
chr15	72398993	72399408	11	chr15	72399213	72399227	+	2.54e-06	5
chr15	72398993	72399408	11	chr15	72399164	72399178	+	1.51e-07	5
chr15	72398993	72399408	11	chr15	72399159	72399173	-	2.37e-05	5
chr4	21639241	21639727	12	chr4	21639436	21639450	-	2.78e-07	9
chr4	21639241	21639727	12	chr4	21639364	21639378	-	1.92e-07	9
chr4	21639241	21639727	12	chr4	21639378	21639392	-	0.000312	9
chr4	21639241	21639727	12	chr4	21639423	21639437	-	0.000883	9
chr4	21639241	21639727	12	chr4	21639548	21639562	-	8.98e-08	9
chr4	21639241	21639727	12	chr4	21639470	21639484	-	0.000356	9
chr4	21639241	21639727	12	chr4	21639489	21639503	-	8.98e-08	9
chr4	21639241	21639727	12	chr4	21639602	21639616	-	0.000178	9
chr4	21639241	21639727	12	chr4	21639560	21639574	-	0.000998	9
chr2	157738911	157739483	13	chr2	157739328	157739342	+	1.37e-05	8
chr2	157738911	157739483	13	chr2	157738948	157738962	-	9.44e-05	8
chr2	157738911	157739483	13	chr2	157738959	157738973	-	0.000781	8
chr2	157738911	157739483	13	chr2	157739247	157739261	+	5.47e-07	8
chr2	157738911	157739483	13	chr2	157739008	157739022	+	4.82e-06	8
chr2	157738911	157739483	13	chr2	157739000	157739014	-	0.000734	8
chr2	157738911	157739483	13	chr2	157739093	157739107	+	0.000344	8
chr2	157738911	157739483	13	chr2	157739291	157739305	+	9.2e-06	8
chr6	113802353	113802789	14	chr6	113802544	113802558	+	4.95e-05	3
chr6	113802353	113802789	14	chr6	113802457	113802471	+	2.77e-06	3
chr6	113802353	113802789	14	chr6	113802605	113802619	+	2.2e-07	3
chr11	118446177	118446536	15	chr11	118446380	118446394	+	8.66e-05	5
chr11	118446177	118446536	15	chr11	118446309	118446323	+	0.000246	5
chr11	118446177	118446536	15	chr11	118446265	118446279	+	7.24e-05	5
chr11	118446177	118446536	15	chr11	118446513	118446527	+	0.000237	5
chr11	118446177	118446536	15	chr11	118446415	118446429	+	0.000649	5
chr4	155233443	155233873	16	chr4	155233674	155233688	+	4.47e-06	8
chr4	155233443	155233873	16	chr4	155233548	155233562	+	1.76e-05	8
chr4	155233443	155233873	16	chr4	155233560	155233574	+	0.000198	8
chr4	155233443	155233873	16	chr4	155233591	155233605	+	0.000254	8
chr4	155233443	155233873	16	chr4	155233651	155233665	+	0.000322	8
chr4	155233443	155233873	16	chr4	155233639	155233653	+	0.000649	8
chr4	155233443	155233873	16	chr4	155233703	155233717	+	6.3e-05	8
chr4	155233443	155233873	16	chr4	155233792	155233806	+	7.58e-05	8
chr19	42330325	42330774	17	chr19	42330539	42330553	-	6.01e-06	4
chr19	42330325	42330774	17	chr19	42330460	42330474	-	0.000322	4
chr19	42330325	42330774	17	chr19	42330343	42330357	+	0.000856	4
chr19	42330325	42330774	17	chr19	42330600	42330614	-	4.71e-05	4
chr3	5860517	5860921	18	chr3	5860577	5860591	-	0.000968	2
chr3	5860517	5860921	18	chr3	5860878	5860892	-	0.000291	2
chr9	21754796	21755163	19	chr9	21754951	21754965	-	1.51e-07	2
chr9	21754796	21755163	19	chr9	21754969	21754983	+	8.66e-05	2
chr4	130671224	130671581	20	chr4	130671331	130671345	+	8.66e-05	3
chr4	130671224	130671581	20	chr4	130671273	130671287	+	0.000165	3
chr4	130671224	130671581	20	chr4	130671374	130671388	+	3e-06	3
chr8	114652744	114653137	21	chr8	114652888	114652902	-	9.2e-06	2
chr8	114652744	114653137	21	chr8	114652978	114652992	-	5.73e-05	2
chr12	106560347	106560859	22	chr12	106560729	106560743	+	0.000136	7
chr12	106560347	106560859	22	chr12	106560408	106560422	+	5.46e-05	7
chr12	106560347	106560859	22	chr12	106560667	106560681	+	1.12e-06	7
chr12	106560347	106560859	22	chr12	106560502	106560516	+	2.34e-06	7
chr12	106560347	106560859	22	chr12	106560456	106560470	+	0.00091	7
chr12	106560347	106560859	22	chr12	106560620	106560634	+	9.85e-05	7
chr12	106560347	106560859	22	chr12	106560519	106560533	+	0.000107	7
chr7	52025445	52025878	23	chr7	52025622	52025636	-	0.000131	3
chr7	52025445	52025878	23	chr7	52025572	52025586	-	9.2e-06	3
chr7	52025445	52025878	23	chr7	52025780	52025794	-	6.01e-05	3
chr15	73906426	73906772	24	chr15	73906583	73906597	+	2.6e-08	2
chr15	73906426	73906772	24	chr15	73906527	73906541	+	0.000322	2
chr14	64331929	64332290	25	chr14	64332220	64332234	-	0.000939	6
chr14	64331929	64332290	25	chr14	64332036	64332050	-	1.28e-05	6
chr14	64331929	64332290	25	chr14	64332002	64332016	-	9.21e-07	6
chr14	64331929	64332290	25	chr14	64331968	64331982	-	0.000121	6
chr14	64331929	64332290	25	chr14	64332065	64332079	-	1.87e-05	6
chr14	64331929	64332290	25	chr14	64332145	64332159	-	0.000198	6
chr5	113147703	113148050	26	chr5	113147821	113147835	+	2.34e-06	2
chr5	113147703	113148050	26	chr5	113147862	113147876	+	2.95e-05	2
chr7	3220362	3222608	27	chr7	3220799	3220813	-	0.000883	6
chr7	3220362	3222608	27	chr7	3220686	3220700	-	0.000272	6
chr7	3220362	3222608	27	chr7	3221549	3221563	+	0.000669	6
chr7	3220362	3222608	27	chr7	3220832	3220846	+	0.000691	6
chr7	3220362	3222608	27	chr7	3221506	3221520	-	0.000153	6
chr7	3220362	3222608	27	chr7	3221385	3221399	-	0.000322	6
chr2	181036774	181037164	28	chr2	181036922	181036936	-	2.6e-08	5
chr2	181036774	181037164	28	chr2	181037135	181037149	+	0.000475	5
chr2	181036774	181037164	28	chr2	181036988	181037002	-	8.98e-08	5
chr2	181036774	181037164	28	chr2	181037034	181037048	-	0.000171	5
chr2	181036774	181037164	28	chr2	181037000	181037014	-	0.00091	5
chr9	99118728	99119144	29	chr9	99118783	99118797	+	0.000883	5
chr9	99118728	99119144	29	chr9	99118992	99119006	-	2.2e-07	5
chr9	99118728	99119144	29	chr9	99118859	99118873	-	1.79e-06	5
chr9	99118728	99119144	29	chr9	99118914	99118928	-	6.58e-08	5
chr9	99118728	99119144	29	chr9	99119119	99119133	+	0.00046	5
chr5	23615947	23616339	30	chr5	23616079	23616093	+	2.6e-08	6
chr5	23615947	23616339	30	chr5	23616016	23616030	+	2.2e-07	6
chr5	23615947	23616339	30	chr5	23616209	23616223	+	7.93e-05	6
chr5	23615947	23616339	30	chr5	23616193	23616207	+	1.92e-07	6
chr5	23615947	23616339	30	chr5	23616134	23616148	+	2.95e-05	6
chr5	23615947	23616339	30	chr5	23616168	23616182	+	0.000301	6
chr8	74007809	74008159	31	chr8	74007926	74007940	+	1.19e-07	1
chr6	55058386	55058727	32	chr6	55058603	55058617	-	0.00061	7
chr6	55058386	55058727	32	chr6	55058428	55058442	-	0.000301	7
chr6	55058386	55058727	32	chr6	55058394	55058408	+	0.00049	7
chr6	55058386	55058727	32	chr6	55058411	55058425	-	0.000669	7
chr6	55058386	55058727	32	chr6	55058557	55058571	-	1.96e-06	7
chr6	55058386	55058727	32	chr6	55058508	55058522	-	0.000116	7
chr6	55058386	55058727	32	chr6	55058611	55058625	+	0.000805	7
chr17	56381105	56381821	33	chr17	56381516	56381530	-	0.000333	7
chr17	56381105	56381821	33	chr17	56381190	56381204	-	1.87e-05	7
chr17	56381105	56381821	33	chr17	56381471	56381485	-	0.000291	7
chr17	56381105	56381821	33	chr17	56381743	56381757	+	0.000432	7
chr17	56381105	56381821	33	chr17	56381646	56381660	-	6.01e-06	7
chr17	56381105	56381821	33	chr17	56381587	56381601	-	1.65e-05	7
chr17	56381105	56381821	33	chr17	56381754	56381768	-	0.000691	7
chr2	132607193	132607814	34	chr2	132607644	132607658	+	2.78e-07	4
chr2	132607193	132607814	34	chr2	132607537	132607551	-	2.34e-06	4
chr2	132607193	132607814	34	chr2	132607747	132607761	-	0.000629	4
chr2	132607193	132607814	34	chr2	132607677	132607691	+	0.000712	4
chr4	136480472	136480827	35	chr4	136480645	136480659	-	8.57e-06	4
chr4	136480472	136480827	35	chr4	136480620	136480634	+	9.04e-05	4
chr4	136480472	136480827	35	chr4	136480615	136480629	-	3.25e-06	4
chr4	136480472	136480827	35	chr4	136480491	136480505	-	0.000574	4
chr5	33780857	33781225	36	chr5	33781175	33781189	+	0.000165	3
chr5	33780857	33781225	36	chr5	33780999	33781013	-	3.53e-06	3
chr5	33780857	33781225	36	chr5	33781055	33781069	-	0.000147	3
chr5	121528604	121528962	37	chr5	121528709	121528723	+	8.98e-08	2
chr5	121528604	121528962	37	chr5	121528752	121528766	+	8.29e-07	2
chr17	35406967	35407344	38	chr17	35407038	35407052	-	4.35e-08	4
chr17	35406967	35407344	38	chr17	35407019	35407033	-	0.000153	4
chr17	35406967	35407344	38	chr17	35407102	35407116	-	1.73e-07	4
chr17	35406967	35407344	38	chr17	35407173	35407187	-	3.5e-07	4
chr6	143078084	143078454	39	chr6	143078276	143078290	+	1.92e-07	2
chr6	143078084	143078454	39	chr6	143078195	143078209	+	6.58e-08	2
chr18	82588252	82588568	40	chr18	82588400	82588414	+	1.36e-06	2
chr18	82588252	82588568	40	chr18	82588352	82588366	+	4.13e-06	2
chr19	10477584	10478012	41	chr19	10477778	10477792	-	0.000367	2
chr19	10477584	10478012	41	chr19	10477816	10477830	-	0.000446	2
chr11	114913579	114913938	42	chr11	114913744	114913758	+	2.95e-05	4
chr11	114913579	114913938	42	chr11	114913691	114913705	+	6.01e-05	4
chr11	114913579	114913938	42	chr11	114913627	114913641	-	0.000781	4
chr11	114913579	114913938	42	chr11	114913641	114913655	+	0.000506	4
chr4	124977790	124978139	43	chr4	124977961	124977975	-	7.58e-05	4
chr4	124977790	124978139	43	chr4	124977889	124977903	-	2.5e-05	4
chr4	124977790	124978139	43	chr4	124978118	124978132	-	0.000629	4
chr4	124977790	124978139	43	chr4	124978053	124978067	-	0.00049	4
chr2	28771574	28771968	44	chr2	28771791	28771805	-	1.03e-07	4
chr2	28771574	28771968	44	chr2	28771716	28771730	-	3.46e-05	4
chr2	28771574	28771968	44	chr2	28771722	28771736	-	0.000883	4
chr2	28771574	28771968	44	chr2	28771825	28771839	+	0.000446	4
chr7	135375313	135375676	45	chr7	135375363	135375377	+	0.000475	4
chr7	135375313	135375676	45	chr7	135375465	135375479	-	0.000998	4
chr7	135375313	135375676	45	chr7	135375416	135375430	+	6.58e-08	4
chr7	135375313	135375676	45	chr7	135375484	135375498	+	1.92e-07	4
chr2	32873620	32873941	46	chr2	32873762	32873776	-	3.82e-06	3
chr2	32873620	32873941	46	chr2	32873741	32873755	-	1.12e-05	3
chr2	32873620	32873941	46	chr2	32873800	32873814	+	0.000781	3
chr16	95315410	95315757	47	chr16	95315566	95315580	+	1.79e-06	2
chr16	95315410	95315757	47	chr16	95315518	95315532	+	4.13e-06	2
chr8	91347788	91348274	48	chr8	91347880	91347894	-	1.92e-07	9
chr8	91347788	91348274	48	chr8	91348116	91348130	-	0.000574	9
chr8	91347788	91348274	48	chr8	91348049	91348063	-	6.58e-08	9
chr8	91347788	91348274	48	chr8	91348026	91348040	+	0.000272	9
chr8	91347788	91348274	48	chr8	91347995	91348009	+	0.000272	9
chr8	91347788	91348274	48	chr8	91347894	91347908	-	0.000301	9
chr8	91347788	91348274	48	chr8	91348083	91348097	-	0.00091	9
chr8	91347788	91348274	48	chr8	91348102	91348116	-	8.98e-08	9
chr8	91347788	91348274	48	chr8	91348158	91348172	-	4.82e-06	9
chr2	118934300	118934688	49	chr2	118934436	118934450	-	5.6e-06	5
chr2	118934300	118934688	49	chr2	118934414	118934428	-	0.000432	5
chr2	118934300	118934688	49	chr2	118934569	118934583	-	5.46e-05	5
chr2	118934300	118934688	49	chr2	118934501	118934515	-	6.58e-08	5
chr2	118934300	118934688	49	chr2	118934482	118934496	-	0.000475	5
chr9	20661590	20661995	50	chr9	20661716	20661730	+	0.000111	4
chr9	20661590	20661995	50	chr9	20661661	20661675	-	0.00061	4
chr9	20661590	20661995	50	chr9	20661760	20661774	+	5.6e-06	4
chr9	20661590	20661995	50	chr9	20661916	20661930	+	7.24e-05	4
chr9	108729115	108729597	51	chr9	108729352	108729366	+	0.000446	6
chr9	108729115	108729597	51	chr9	108729306	108729320	-	0.000184	6
chr9	108729115	108729597	51	chr9	108729129	108729143	-	9.04e-05	6
chr9	108729115	108729597	51	chr9	108729134	108729148	+	0.000221	6
chr9	108729115	108729597	51	chr9	108729428	108729442	-	3.82e-06	6
chr9	108729115	108729597	51	chr9	108729389	108729403	-	6.01e-06	6
chr4	139995807	139996265	52	chr4	139995924	139995938	+	0.000206	3
chr4	139995807	139996265	52	chr4	139995813	139995827	-	0.000379	3
chr4	139995807	139996265	52	chr4	139995985	139995999	+	3.53e-06	3
chr13	55072198	55072590	53	chr13	55072444	55072458	-	6.95e-06	5
chr13	55072198	55072590	53	chr13	55072383	55072397	-	0.000856	5
chr13	55072198	55072590	53	chr13	55072256	55072270	-	0.000432	5
chr13	55072198	55072590	53	chr13	55072406	55072420	-	6.95e-06	5
chr13	55072198	55072590	53	chr13	55072425	55072439	-	6.95e-06	5
chr7	145275620	145276071	54	chr7	145275814	145275828	-	0.000781	4
chr7	145275620	145276071	54	chr7	145275941	145275955	-	6.3e-05	4
chr7	145275620	145276071	54	chr7	145275894	145275908	-	0.000539	4
chr7	145275620	145276071	54	chr7	145275975	145275989	+	0.000367	4
chr2	152857971	152858357	55	chr2	152858172	152858186	-	0.000107	3
chr2	152857971	152858357	55	chr2	152858136	152858150	-	1.28e-05	3
chr2	152857971	152858357	55	chr2	152858061	152858075	+	0.000998	3
chr12	56701224	56701573	56	chr12	56701376	56701390	-	1.05e-05	2
chr12	56701224	56701573	56	chr12	56701349	56701363	-	1.28e-05	2
chr4	127297157	127297484	57	chr4	127297306	127297320	-	8.57e-06	3
chr4	127297157	127297484	57	chr4	127297282	127297296	-	1.2e-05	3
chr4	127297157	127297484	57	chr4	127297197	127297211	-	0.000574	3
chr16	62758211	62758581	58	chr16	62758370	62758384	+	2.6e-08	5
chr16	62758211	62758581	58	chr16	62758318	62758332	+	1.24e-06	5
chr16	62758211	62758581	58	chr16	62758259	62758273	+	1.87e-05	5
chr16	62758211	62758581	58	chr16	62758304	62758318	+	0.000856	5
chr16	62758211	62758581	58	chr16	62758438	62758452	+	1.37e-05	5
chr1	175291840	175292195	59	chr1	175292022	175292036	-	1.46e-05	2
chr1	175291840	175292195	59	chr1	175291972	175291986	-	1.98e-05	2
chr13	100980559	100980903	60	chr13	100980727	100980741	-	8.98e-08	6
chr13	100980559	100980903	60	chr13	100980653	100980667	-	0.00061	6
chr13	100980559	100980903	60	chr13	100980602	100980616	+	0.000998	6
chr13	100980559	100980903	60	chr13	100980709	100980723	-	0.000998	6
chr13	100980559	100980903	60	chr13	100980675	100980689	-	3.53e-06	6
chr13	100980559	100980903	60	chr13	100980817	100980831	-	9.2e-06	6
chr8	86978500	86978879	61	chr8	86978847	86978861	-	0.00046	5
chr8	86978500	86978879	61	chr8	86978533	86978547	-	0.000831	5
chr8	86978500	86978879	61	chr8	86978516	86978530	+	0.000691	5
chr8	86978500	86978879	61	chr8	86978641	86978655	+	0.000282	5
chr8	86978500	86978879	61	chr8	86978691	86978705	-	0.000379	5
chr12	44073801	44074160	62	chr12	44073922	44073936	+	1.49e-06	5
chr12	44073801	44074160	62	chr12	44073906	44073920	+	3.11e-07	5
chr12	44073801	44074160	62	chr12	44073954	44073968	+	1.49e-06	5
chr12	44073801	44074160	62	chr12	44073938	44073952	+	1.49e-06	5
chr12	44073801	44074160	62	chr12	44074077	44074091	+	0.00049	5
chr8	87470943	87471505	63	chr8	87471219	87471233	+	1.05e-05	5
chr8	87470943	87471505	63	chr8	87471214	87471228	-	0.000968	5
chr8	87470943	87471505	63	chr8	87471245	87471259	+	1.65e-05	5
chr8	87470943	87471505	63	chr8	87471231	87471245	+	0.000556	5
chr8	87470943	87471505	63	chr8	87471468	87471482	-	0.000649	5
chr17	34109643	34109988	64	chr17	34109738	34109752	+	6.58e-08	4
chr17	34109643	34109988	64	chr17	34109715	34109729	+	0.000418	4
chr17	34109643	34109988	64	chr17	34109822	34109836	+	0.000939	4
chr17	34109643	34109988	64	chr17	34109803	34109817	+	1.92e-07	4
chr8	121782451	121782928	65	chr8	121782489	121782503	-	0.000649	4
chr8	121782451	121782928	65	chr8	121782858	121782872	+	0.00061	4
chr8	121782451	121782928	65	chr8	121782820	121782834	+	0.000367	4
chr8	121782451	121782928	65	chr8	121782756	121782770	-	0.000539	4
chr7	129814326	129814695	66	chr7	129814448	129814462	+	5.2e-06	7
chr7	129814326	129814695	66	chr7	129814368	129814382	-	0.000669	7
chr7	129814326	129814695	66	chr7	129814520	129814534	+	1.87e-05	7
chr7	129814326	129814695	66	chr7	129814512	129814526	-	0.00061	7
chr7	129814326	129814695	66	chr7	129814631	129814645	+	6.01e-05	7
chr7	129814326	129814695	66	chr7	129814626	129814640	-	0.000246	7
chr7	129814326	129814695	66	chr7	129814547	129814561	+	0.000312	7
chr6	121423148	121423471	67	chr6	121423280	121423294	+	2.5e-05	2
chr6	121423148	121423471	67	chr6	121423235	121423249	+	0.00049	2
chr5	28063710	28064063	68	chr5	28063903	28063917	+	3.12e-05	2
chr5	28063710	28064063	68	chr5	28063863	28063877	+	9.64e-10	2
chr11	119354153	119354531	69	chr11	119354353	119354367	-	6.58e-08	5
chr11	119354153	119354531	69	chr11	119354300	119354314	-	1.92e-07	5
chr11	119354153	119354531	69	chr11	119354210	119354224	-	0.000178	5
chr11	119354153	119354531	69	chr11	119354313	119354327	-	0.000111	5
chr11	119354153	119354531	69	chr11	119354334	119354348	-	0.000574	5
chr6	48502917	48503260	70	chr6	48503028	48503042	+	6.58e-08	2
chr6	48502917	48503260	70	chr6	48503096	48503110	+	8.98e-08	2
chr4	126850766	126851166	71	chr4	126851073	126851087	-	0.000282	4
chr4	126850766	126851166	71	chr4	126850955	126850969	+	1.02e-06	4
chr4	126850766	126851166	71	chr4	126850907	126850921	+	1.46e-05	4
chr4	126850766	126851166	71	chr4	126850992	126851006	-	0.000805	4
chrX	71114711	71115059	72	chrX	71114875	71114889	+	6.92e-05	4
chrX	71114711	71115059	72	chrX	71114800	71114814	-	0.000556	4
chrX	71114711	71115059	72	chrX	71114845	71114859	+	8.28e-05	4
chrX	71114711	71115059	72	chrX	71115015	71115029	-	0.000418	4
chr2	33946158	33946495	73	chr2	33946274	33946288	-	3.12e-05	3
chr2	33946158	33946495	73	chr2	33946467	33946481	-	0.000344	3
chr2	33946158	33946495	73	chr2	33946289	33946303	+	0.000649	3
chr8	73409541	73409887	74	chr8	73409730	73409744	+	0.000805	3
chr8	73409541	73409887	74	chr8	73409697	73409711	-	4.05e-05	3
chr8	73409541	73409887	74	chr8	73409851	73409865	+	0.000556	3
chr4	133576606	133576922	75	chr4	133576710	133576724	+	6.95e-06	3
chr4	133576606	133576922	75	chr4	133576740	133576754	+	5.46e-05	3
chr4	133576606	133576922	75	chr4	133576782	133576796	+	0.000141	3
chr11	55421275	55421580	76	chr11	55421414	55421428	-	3.46e-05	2
chr11	55421275	55421580	76	chr11	55421446	55421460	-	0.000141	2
chr2	5300242	5300563	77	chr2	5300516	5300530	+	6.3e-05	1
chr2	38273533	38273886	78	chr2	38273681	38273695	-	0.000831	3
chr2	38273533	38273886	78	chr2	38273656	38273670	-	2.37e-05	3
chr2	38273533	38273886	78	chr2	38273686	38273700	+	2.78e-07	3
chr4	126332635	126333004	79	chr4	126332813	126332827	+	4.05e-05	2
chr4	126332635	126333004	79	chr4	126332731	126332745	+	4.26e-05	2
chr9	66155185	66155529	80	chr9	66155365	66155379	-	1.34e-07	2
chr9	66155185	66155529	80	chr9	66155312	66155326	-	1.09e-08	2
chr15	89283762	89284152	81	chr15	89283912	89283926	-	0.000712	5
chr15	89283762	89284152	81	chr15	89283892	89283906	-	9.04e-05	5
chr15	89283762	89284152	81	chr15	89283799	89283813	+	5.2e-05	5
chr15	89283762	89284152	81	chr15	89284098	89284112	+	0.000574	5
chr15	89283762	89284152	81	chr15	89283929	89283943	-	4.92e-08	5
chr15	72520265	72520599	82	chr15	72520557	72520571	+	1.98e-05	3
chr15	72520265	72520599	82	chr15	72520409	72520423	+	6.92e-05	3
chr15	72520265	72520599	82	chr15	72520374	72520388	-	0.000539	3
chr7	46711192	46711597	83	chr7	46711333	46711347	-	2.54e-06	6
chr7	46711192	46711597	83	chr7	46711266	46711280	-	0.000522	6
chr7	46711192	46711597	83	chr7	46711223	46711237	-	9.85e-05	6
chr7	46711192	46711597	83	chr7	46711300	46711314	-	0.000629	6
chr7	46711192	46711597	83	chr7	46711374	46711388	-	2.6e-08	6
chr7	46711192	46711597	83	chr7	46711435	46711449	-	2.2e-07	6
chr2	136539899	136540250	84	chr2	136540117	136540131	-	0.000712	4
chr2	136539899	136540250	84	chr2	136540031	136540045	-	0.000206	4
chr2	136539899	136540250	84	chr2	136539962	136539976	-	0.000111	4
chr2	136539899	136540250	84	chr2	136540081	136540095	-	6.6e-05	4
chr16	35302529	35303324	85	chr16	35302848	35302862	+	0.000367	6
chr16	35302529	35303324	85	chr16	35302655	35302669	-	9.21e-07	6
chr16	35302529	35303324	85	chr16	35303128	35303142	+	1.19e-07	6
chr16	35302529	35303324	85	chr16	35302922	35302936	+	0.000206	6
chr16	35302529	35303324	85	chr16	35302883	35302897	+	0.000301	6
chr16	35302529	35303324	85	chr16	35303205	35303219	+	0.000475	6
chr7	25144197	25144652	86	chr7	25144396	25144410	+	0.000418	2
chr7	25144197	25144652	86	chr7	25144466	25144480	-	3.29e-05	2
chr14	65187448	65187798	87	chr14	65187604	65187618	+	0.000379	2
chr14	65187448	65187798	87	chr14	65187543	65187557	-	2.8e-05	2
chr2	172066593	172066921	88	chr2	172066701	172066715	+	8.29e-07	3
chr2	172066593	172066921	88	chr2	172066781	172066795	-	0.000221	3
chr2	172066593	172066921	88	chr2	172066735	172066749	+	9.64e-10	3
chr13	54852130	54852450	89	chr13	54852249	54852263	-	2.65e-05	2
chr13	54852130	54852450	89	chr13	54852269	54852283	+	0.000116	2
chr4	154771671	154771985	90	chr4	154771822	154771836	-	0.000178	4
chr4	154771671	154771985	90	chr4	154771803	154771817	-	4.13e-06	4
chr4	154771671	154771985	90	chr4	154771725	154771739	-	0.000691	4
chr4	154771671	154771985	90	chr4	154771852	154771866	-	0.000574	4
chr7	28181145	28181447	91	chr7	28181306	28181320	-	1.76e-05	1
chr7	134598451	134598785	92	chr7	134598573	134598587	-	8.98e-08	3
chr7	134598451	134598785	92	chr7	134598697	134598711	-	0.000206	3
chr7	134598451	134598785	92	chr7	134598628	134598642	-	8.98e-08	3
chr8	121687993	121688336	93	chr8	121688190	121688204	-	0.000939	4
chr8	121687993	121688336	93	chr8	121688163	121688177	-	3.11e-07	4
chr8	121687993	121688336	93	chr8	121688292	121688306	+	0.000968	4
chr8	121687993	121688336	93	chr8	121688199	121688213	+	0.00091	4
chr19	44766908	44767249	94	chr19	44767043	44767057	-	9.2e-06	1
chr4	32688161	32688486	95	chr4	32688360	32688374	+	0.000184	3
chr4	32688161	32688486	95	chr4	32688300	32688314	+	4.39e-07	3
chr4	32688161	32688486	95	chr4	32688365	32688379	-	0.000291	3
chr8	73249988	73250353	96	chr8	73250160	73250174	-	5.65e-08	1
chr2	31201664	31201993	97	chr2	31201821	31201835	-	3.65e-05	1
chr3	89568264	89568558	98	chr3	89568506	89568520	+	0.000392	3
chr3	89568264	89568558	98	chr3	89568375	89568389	+	2.11e-05	3
chr3	89568264	89568558	98	chr3	89568289	89568303	-	7.93e-05	3
chr7	133570839	133571236	99	chr7	133571018	133571032	+	8.98e-08	3
chr7	133570839	133571236	99	chr7	133570969	133570983	+	7.47e-07	3
chr7	133570839	133571236	99	chr7	133571083	133571097	+	1.02e-06	3
chr7	124780248	124780602	100	chr7	124780431	124780445	-	0.000272	2
chr7	124780248	124780602	100	chr7	124780360	124780374	-	0.000669	2
chr11	55624305	55624628	101	chr11	55624407	55624421	+	4.35e-08	3
chr11	55624305	55624628	101	chr11	55624376	55624390	+	0.000968	3
chr11	55624305	55624628	101	chr11	55624439	55624453	+	4.35e-08	3
chr8	124260176	124260472	102	chr8	124260307	124260321	-	3.53e-06	3
chr8	124260176	124260472	102	chr8	124260248	124260262	+	8.66e-05	3
chr8	124260176	124260472	102	chr8	124260440	124260454	+	5.46e-05	3
chr14	33134951	33135280	103	chr14	33135095	33135109	-	0.000475	1
chr14	65165648	65165995	104	chr14	65165778	65165792	-	2.77e-06	3
chr14	65165648	65165995	104	chr14	65165824	65165838	-	1.76e-05	3
chr14	65165648	65165995	104	chr14	65165806	65165820	-	0.00091	3
chr4	147603839	147604145	105	chr4	147603942	147603956	+	0.000272	4
chr4	147603839	147604145	105	chr4	147603908	147603922	-	0.00061	4
chr4	147603839	147604145	105	chr4	147603981	147603995	+	0.000107	4
chr4	147603839	147604145	105	chr4	147604131	147604145	-	3.46e-05	4
chr19	5794679	5795444	106	chr19	5795074	5795088	+	0.000213	3
chr19	5794679	5795444	106	chr19	5794803	5794817	+	5.2e-05	3
chr19	5794679	5795444	106	chr19	5795033	5795047	+	0.000379	3
chr9	43506581	43506895	107	chr9	43506697	43506711	+	9.85e-05	1
chr15	83342996	83343432	108	chr15	83343042	83343056	+	2.2e-07	8
chr15	83342996	83343432	108	chr15	83343028	83343042	+	0.000165	8
chr15	83342996	83343432	108	chr15	83343216	83343230	+	2.34e-06	8
chr15	83342996	83343432	108	chr15	83343102	83343116	+	2.23e-05	8
chr15	83342996	83343432	108	chr15	83343123	83343137	+	8.98e-08	8
chr15	83342996	83343432	108	chr15	83343165	83343179	+	0.000757	8
chr15	83342996	83343432	108	chr15	83343288	83343302	+	0.000171	8
chr15	83342996	83343432	108	chr15	83343302	83343316	+	1.92e-07	8
chr14	37829145	37829467	109	chr14	37829292	37829306	+	2.34e-06	1
chr5	114541137	114541448	110	chr5	114541278	114541292	-	2.2e-07	2
chr5	114541137	114541448	110	chr5	114541174	114541188	-	0.000206	2
chr11	115675369	115675687	111	chr11	115675520	115675534	-	3.82e-06	1
chr8	114928053	114928367	112	chr8	114928209	114928223	+	0.000669	2
chr8	114928053	114928367	112	chr8	114928165	114928179	+	1.28e-05	2
chr2	156478443	156478959	113	chr2	156478732	156478746	-	0.000432	3
chr2	156478443	156478959	113	chr2	156478527	156478541	-	4.35e-08	3
chr2	156478443	156478959	113	chr2	156478773	156478787	-	0.000254	3
chr8	108217607	108217901	114	chr8	108217622	108217636	+	0.000312	3
chr8	108217607	108217901	114	chr8	108217769	108217783	-	6.6e-05	3
chr8	108217607	108217901	114	chr8	108217886	108217900	+	0.000883	3
chr11	103914643	103914955	115	chr11	103914749	103914763	+	8.02e-06	1
chr6	89192380	89192727	116	chr6	89192694	89192708	+	4.13e-06	2
chr6	89192380	89192727	116	chr6	89192533	89192547	-	1.51e-07	2
chr9	119298134	119298444	117	chr9	119298269	119298283	-	5.47e-07	1
chr7	117845111	117845571	118	chr7	117845210	117845224	-	0.000883	5
chr7	117845111	117845571	118	chr7	117845357	117845371	+	0.000392	5
chr7	117845111	117845571	118	chr7	117845349	117845363	-	0.000998	5
chr7	117845111	117845571	118	chr7	117845346	117845360	-	0.000556	5
chr7	117845111	117845571	118	chr7	117845395	117845409	-	3.92e-07	5
chr13	55046770	55047089	119	chr13	55046853	55046867	-	7.24e-05	2
chr13	55046770	55047089	119	chr13	55046883	55046897	+	1.96e-06	2
chr9	75531629	75531965	120	chr9	75531749	75531763	+	1.05e-05	2
chr9	75531629	75531965	120	chr9	75531829	75531843	-	0.00091	2
chr3	96116212	96116542	121	chr3	96116515	96116529	-	0.000191	3
chr3	96116212	96116542	121	chr3	96116376	96116390	+	0.000734	3
chr3	96116212	96116542	121	chr3	96116344	96116358	-	1.19e-07	3
chr8	86995221	86995544	122	chr8	86995498	86995512	+	0.000272	2
chr8	86995221	86995544	122	chr8	86995366	86995380	-	3.13e-08	2
chr11	103976096	103976418	123	chr11	103976221	103976235	+	3.34e-09	1
chr11	84757506	84757821	124	chr11	84757619	84757633	+	1.79e-06	1
chr5	140693939	140694250	125	chr5	140694038	140694052	+	1.36e-06	1
chr5	150290895	150291422	126	chr5	150290966	150290980	+	1.37e-05	4
chr5	150290895	150291422	126	chr5	150291083	150291097	-	0.000432	4
chr5	150290895	150291422	126	chr5	150291231	150291245	-	1.28e-05	4
chr5	150290895	150291422	126	chr5	150291300	150291314	-	0.000734	4
chr2	156502690	156503069	127	chr2	156502811	156502825	+	0.000198	5
chr2	156502690	156503069	127	chr2	156502780	156502794	-	0.000229	5
chr2	156502690	156503069	127	chr2	156502913	156502927	+	1.56e-05	5
chr2	156502690	156503069	127	chr2	156502829	156502843	+	0.000418	5
chr2	156502690	156503069	127	chr2	156502844	156502858	-	0.000669	5
chr19	22213721	22214070	128	.	.	.	.	.	0
chr12	88324458	88324757	129	chr12	88324584	88324598	-	1.63e-06	2
chr12	88324458	88324757	129	chr12	88324666	88324680	+	0.000191	2
chr8	74195517	74195825	130	chr8	74195806	74195820	+	0.000312	2
chr8	74195517	74195825	130	chr8	74195639	74195653	-	1.76e-05	2
chr11	33580143	33580450	131	chr11	33580283	33580297	-	1.12e-05	1
chr11	74432700	74433056	132	chr11	74432831	74432845	+	6.01e-06	2
chr11	74432700	74433056	132	chr11	74432737	74432751	+	0.000968	2
chr9	78324350	78325332	133	chr9	78324498	78324512	+	0.000968	1
chr2	25257927	25258230	134	chr2	25258054	25258068	-	2.6e-08	1
chr18	38376666	38376979	135	chr18	38376806	38376820	+	9.64e-10	2
chr18	38376666	38376979	135	chr18	38376933	38376947	+	0.000291	2
chr9	86916533	86916858	136	chr9	86916644	86916658	-	0.000198	2
chr9	86916533	86916858	136	chr9	86916731	86916745	+	0.000669	2
chr11	11925779	11926115	137	chr11	11925902	11925916	-	1.19e-07	3
chr11	11925779	11926115	137	chr11	11925936	11925950	-	2.77e-06	3
chr11	11925779	11926115	137	chr11	11925952	11925966	-	1.24e-06	3
chr11	118464483	118464828	138	chr11	118464813	118464827	+	0.000147	2
chr11	118464483	118464828	138	chr11	118464626	118464640	-	2.23e-05	2
chr13	25360984	25361296	139	chr13	25361212	25361226	+	0.000506	3
chr13	25360984	25361296	139	chr13	25361151	25361165	+	0.00046	3
chr13	25360984	25361296	139	chr13	25361090	25361104	+	1.12e-06	3
chr7	29048889	29049201	140	chr7	29049000	29049014	+	3.84e-05	1
chr2	21288933	21289281	141	chr2	21289127	21289141	-	0.000939	2
chr2	21288933	21289281	141	chr2	21289086	21289100	-	2.09e-08	2
chr17	28717337	28717695	142	chr17	28717530	28717544	+	6.01e-06	3
chr17	28717337	28717695	142	chr17	28717476	28717490	-	1.65e-05	3
chr17	28717337	28717695	142	chr17	28717627	28717641	-	0.00091	3
chr1	9288532	9288907	143	chr1	9288659	9288673	+	4.47e-06	3
chr1	9288532	9288907	143	chr1	9288593	9288607	-	1.65e-05	3
chr1	9288532	9288907	143	chr1	9288800	9288814	+	0.000229	3
chr7	4130084	4130412	144	chr7	4130309	4130323	+	0.000141	6
chr7	4130084	4130412	144	chr7	4130244	4130258	-	4.47e-06	6
chr7	4130084	4130412	144	chr7	4130138	4130152	+	0.000131	6
chr7	4130084	4130412	144	chr7	4130190	4130204	+	0.000939	6
chr7	4130084	4130412	144	chr7	4130255	4130269	-	0.000291	6
chr7	4130084	4130412	144	chr7	4130394	4130408	+	0.000998	6
chr2	118605337	118605673	145	chr2	118605481	118605495	-	6.92e-05	2
chr2	118605337	118605673	145	chr2	118605377	118605391	+	0.000629	2
chr9	57908741	57909064	146	chr9	57908866	57908880	+	3.65e-05	2
chr9	57908741	57909064	146	chr9	57908965	57908979	+	4.71e-05	2
chr1	5012871	5013229	147	chr1	5012986	5013000	+	1.12e-05	2
chr1	5012871	5013229	147	chr1	5012934	5012948	-	7.24e-05	2
chr7	89773932	89774258	148	chr7	89774074	89774088	+	0.000805	6
chr7	89773932	89774258	148	chr7	89774053	89774067	+	0.000198	6
chr7	89773932	89774258	148	chr7	89773980	89773994	+	0.000165	6
chr7	89773932	89774258	148	chr7	89774001	89774015	+	0.000831	6
chr7	89773932	89774258	148	chr7	89774034	89774048	+	7.73e-08	6
chr7	89773932	89774258	148	chr7	89774154	89774168	+	3.5e-07	6
chr5	137506035	137506355	149	chr5	137506339	137506353	+	3.29e-05	4
chr5	137506035	137506355	149	chr5	137506246	137506260	-	0.000191	4
chr5	137506035	137506355	149	chr5	137506143	137506157	+	2.38e-09	4
chr5	137506035	137506355	149	chr5	137506089	137506103	+	0.000322	4
chr8	15519797	15520119	150	.	.	.	.	.	0
chr2	178928464	178928816	151	chr2	178928604	178928618	+	3.13e-08	5
chr2	178928464	178928816	151	chr2	178928592	178928606	+	6.01e-05	5
chr2	178928464	178928816	151	chr2	178928548	178928562	-	0.000237	5
chr2	178928464	178928816	151	chr2	178928576	178928590	+	0.000418	5
chr2	178928464	178928816	151	chr2	178928785	178928799	-	0.000691	5
chr2	167014371	167014761	152	chr2	167014571	167014585	+	6.01e-06	4
chr2	167014371	167014761	152	chr2	167014436	167014450	+	0.000171	4
chr2	167014371	167014761	152	chr2	167014504	167014518	-	0.000539	4
chr2	167014371	167014761	152	chr2	167014614	167014628	-	8.66e-05	4
chr5	117279804	117280159	153	chr5	117280097	117280111	-	1.05e-05	4
chr5	117279804	117280159	153	chr5	117279965	117279979	-	8.66e-05	4
chr5	117279804	117280159	153	chr5	117280033	117280047	-	0.000691	4
chr5	117279804	117280159	153	chr5	117280112	117280126	-	0.000691	4
chr17	25950535	25950853	154	chr17	25950655	25950669	+	3e-06	2
chr17	25950535	25950853	154	chr17	25950793	25950807	-	0.000539	2
chr2	129541482	129541809	155	chr2	129541706	129541720	+	0.000356	2
chr2	129541482	129541809	155	chr2	129541604	129541618	+	8.57e-06	2
chr18	21074681	21074985	156	chr18	21074787	21074801	+	1.98e-05	1
chr11	80427088	80427388	157	chr11	80427219	80427233	-	3.13e-08	3
chr11	80427088	80427388	157	chr11	80427273	80427287	+	0.000556	3
chr11	80427088	80427388	157	chr11	80427268	80427282	-	5.46e-05	3
chr19	37313678	37313986	158	chr19	37313916	37313930	+	0.000432	3
chr19	37313678	37313986	158	chr19	37313811	37313825	+	0.000107	3
chr19	37313678	37313986	158	chr19	37313857	37313871	+	0.000629	3
chr6	122609651	122609951	159	chr6	122609692	122609706	-	0.000131	3
chr6	122609651	122609951	159	chr6	122609777	122609791	-	6.92e-05	3
chr6	122609651	122609951	159	chr6	122609719	122609733	+	0.000229	3
chr1	162969299	162970772	160	chr1	162970701	162970715	-	0.000757	5
chr1	162969299	162970772	160	chr1	162970225	162970239	+	0.000998	5
chr1	162969299	162970772	160	chr1	162969740	162969754	+	0.000379	5
chr1	162969299	162970772	160	chr1	162969527	162969541	+	0.000506	5
chr1	162969299	162970772	160	chr1	162970375	162970389	+	0.000107	5
chr6	91789671	91789968	161	chr6	91789780	91789794	-	3.34e-09	3
chr6	91789671	91789968	161	chr6	91789885	91789899	+	0.00061	3
chr6	91789671	91789968	161	chr6	91789825	91789839	+	0.000712	3
chr4	139839363	139839740	162	chr4	139839440	139839454	+	4.82e-06	6
chr4	139839363	139839740	162	chr4	139839393	139839407	-	0.000191	6
chr4	139839363	139839740	162	chr4	139839479	139839493	+	2.65e-05	6
chr4	139839363	139839740	162	chr4	139839558	139839572	+	2.78e-07	6
chr4	139839363	139839740	162	chr4	139839494	139839508	-	6.6e-05	6
chr4	139839363	139839740	162	chr4	139839570	139839584	+	0.000333	6
chr7	52712131	52713036	163	chr7	52712222	52712236	+	0.000301	3
chr7	52712131	52713036	163	chr7	52712561	52712575	-	0.000781	3
chr7	52712131	52713036	163	chr7	52712463	52712477	-	4.48e-05	3
chr7	16714828	16715187	164	chr7	16714935	16714949	+	9.44e-05	3
chr7	16714828	16715187	164	chr7	16714925	16714939	+	0.000781	3
chr7	16714828	16715187	164	chr7	16715077	16715091	+	0.000344	3
chr8	114465179	114465471	165	chr8	114465288	114465302	+	1.03e-07	2
chr8	114465179	114465471	165	chr8	114465387	114465401	-	0.000237	2
chr8	126958507	126958823	166	chr8	126958609	126958623	+	6.48e-06	1
chr3	88024823	88025143	167	chr3	88024954	88024968	-	3e-06	1
chr14	37881755	37882090	168	chr14	37881968	37881982	+	0.000111	4
chr14	37881755	37882090	168	chr14	37881926	37881940	+	0.000883	4
chr14	37881755	37882090	168	chr14	37881906	37881920	-	1.12e-05	4
chr14	37881755	37882090	168	chr14	37882065	37882079	+	0.000556	4
chr9	61759403	61760128	169	chr9	61759774	61759788	-	3.74e-08	3
chr9	61759403	61760128	169	chr9	61759672	61759686	+	0.000282	3
chr9	61759403	61760128	169	chr9	61759847	61759861	-	3.12e-05	3
chr6	84624193	84624553	170	chr6	84624390	84624404	+	1.92e-07	8
chr6	84624193	84624553	170	chr6	84624282	84624296	+	6.58e-08	8
chr6	84624193	84624553	170	chr6	84624200	84624214	+	1.87e-05	8
chr6	84624193	84624553	170	chr6	84624323	84624337	+	0.000171	8
chr6	84624193	84624553	170	chr6	84624337	84624351	+	2.78e-07	8
chr6	84624193	84624553	170	chr6	84624491	84624505	+	0.000246	8
chr6	84624193	84624553	170	chr6	84624470	84624484	+	0.00046	8
chr6	84624193	84624553	170	chr6	84624456	84624470	+	0.000291	8
chr4	136463050	136463387	171	chr4	136463175	136463189	+	6.08e-07	1
chr12	25109917	25110215	172	chr12	25109996	25110010	+	4.91e-07	4
chr12	25109917	25110215	172	chr12	25110083	25110097	+	4.05e-05	4
chr12	25109917	25110215	172	chr12	25110054	25110068	+	9.44e-05	4
chr12	25109917	25110215	172	chr12	25110025	25110039	+	0.000178	4
chr10	80211459	80211765	173	chr10	80211548	80211562	+	1.56e-05	1
chr8	112720669	112720987	174	chr8	112720878	112720892	-	0.000178	4
chr8	112720669	112720987	174	chr8	112720764	112720778	+	0.000446	4
chr8	112720669	112720987	174	chr8	112720796	112720810	+	2.5e-05	4
chr8	112720669	112720987	174	chr8	112720841	112720855	-	0.000831	4
chr19	6502664	6502983	175	chr19	6502714	6502728	+	0.000263	4
chr19	6502664	6502983	175	chr19	6502785	6502799	+	2.2e-07	4
chr19	6502664	6502983	175	chr19	6502754	6502768	+	0.000198	4
chr19	6502664	6502983	175	chr19	6502937	6502951	+	0.000432	4
chr10	114621926	114622265	176	chr10	114622043	114622057	+	7.73e-08	3
chr10	114621926	114622265	176	chr10	114622124	114622138	-	8.66e-05	3
chr10	114621926	114622265	176	chr10	114622064	114622078	-	0.000446	3
chr11	78544441	78544757	177	chr11	78544630	78544644	-	0.000159	2
chr11	78544441	78544757	177	chr11	78544540	78544554	+	1.73e-07	2
chr11	100064811	100065168	178	chr11	100064972	100064986	+	4.05e-05	2
chr11	100064811	100065168	178	chr11	100064895	100064909	+	2.14e-06	2
chr2	30798376	30798712	179	chr2	30798492	30798506	+	0.000712	1
chr3	31207819	31208158	180	chr3	31208068	31208082	-	0.000506	5
chr3	31207819	31208158	180	chr3	31207977	31207991	-	1.87e-05	5
chr3	31207819	31208158	180	chr3	31207902	31207916	-	0.000367	5
chr3	31207819	31208158	180	chr3	31207826	31207840	-	0.000939	5
chr3	31207819	31208158	180	chr3	31207907	31207921	+	0.00046	5
chr14	28409558	28409876	181	chr14	28409660	28409674	+	1.61e-08	1
chr12	16660347	16660679	182	chr12	16660571	16660585	+	0.000379	4
chr12	16660347	16660679	182	chr12	16660454	16660468	+	6.01e-05	4
chr12	16660347	16660679	182	chr12	16660400	16660414	+	1.37e-05	4
chr12	16660347	16660679	182	chr12	16660649	16660663	+	0.000968	4
chr7	30549804	30550113	183	chr7	30549964	30549978	+	2.78e-07	5
chr7	30549804	30550113	183	chr7	30549878	30549892	+	0.000556	5
chr7	30549804	30550113	183	chr7	30549859	30549873	+	0.000968	5
chr7	30549804	30550113	183	chr7	30549896	30549910	+	4.82e-06	5
chr7	30549804	30550113	183	chr7	30550051	30550065	+	0.000781	5
chr12	103793322	103793625	184	chr12	103793455	103793469	-	1.12e-05	1
chr2	30784767	30785093	185	chr2	30784897	30784911	-	3.13e-08	1
chr2	98502307	98503205	186	chr2	98502993	98503007	+	0.000883	5
chr2	98502307	98503205	186	chr2	98502693	98502707	+	0.000968	5
chr2	98502307	98503205	186	chr2	98502514	98502528	-	0.000629	5
chr2	98502307	98503205	186	chr2	98502345	98502359	+	0.000968	5
chr2	98502307	98503205	186	chr2	98502813	98502827	+	0.000968	5
chr11	96940121	96940431	187	chr11	96940278	96940292	-	0.000757	2
chr11	96940121	96940431	187	chr11	96940250	96940264	-	1.79e-06	2
chr6	125111133	125111780	188	chr6	125111646	125111660	+	0.000781	4
chr6	125111133	125111780	188	chr6	125111614	125111628	+	5.6e-06	4
chr6	125111133	125111780	188	chr6	125111692	125111706	+	8.66e-05	4
chr6	125111133	125111780	188	chr6	125111700	125111714	-	0.000432	4
chr6	3151370	3151694	189	chr6	3151573	3151587	-	0.000781	1
chr7	25931009	25931340	190	chr7	25931107	25931121	+	1.12e-06	2
chr7	25931009	25931340	190	chr7	25931180	25931194	-	0.000254	2
chr11	4650323	4650634	191	chr11	4650463	4650477	-	1.87e-05	2
chr11	4650323	4650634	191	chr11	4650368	4650382	+	0.000968	2
chr2	180490683	180490960	192	chr2	180490787	180490801	+	1.12e-05	2
chr2	180490683	180490960	192	chr2	180490880	180490894	-	0.000333	2
chr13	54355721	54356007	193	chr13	54355817	54355831	+	1.37e-05	2
chr13	54355721	54356007	193	chr13	54355846	54355860	+	0.000356	2
chr1	154803417	154803693	194	chr1	154803529	154803543	+	6.48e-06	2
chr1	154803417	154803693	194	chr1	154803616	154803630	+	0.000221	2
chr10	126693184	126693512	195	chr10	126693294	126693308	+	6.01e-06	1
chr19	5087853	5088154	196	chr19	5088007	5088021	-	6.48e-06	2
chr19	5087853	5088154	196	chr19	5088081	5088095	+	0.000198	2
chr1	122228459	122228791	197	chr1	122228606	122228620	-	3.12e-05	1
chr3	88963132	88963469	198	chr3	88963266	88963280	-	8.28e-05	4
chr3	88963132	88963469	198	chr3	88963155	88963169	+	0.000198	4
chr3	88963132	88963469	198	chr3	88963166	88963180	+	0.000883	4
chr3	88963132	88963469	198	chr3	88963332	88963346	+	0.000506	4
chr6	113143785	113144104	199	chr6	113143908	113143922	-	6.01e-05	1
chr19	41735526	41735873	200	chr19	41735636	41735650	-	0.000221	2
chr19	41735526	41735873	200	chr19	41735664	41735678	+	6.48e-06	2
chr11	4849280	4849588	201	chr11	4849408	4849422	-	2.37e-05	2
chr11	4849280	4849588	201	chr11	4849370	4849384	-	0.000831	2
chr11	54509521	54509845	202	chr11	54509734	54509748	+	0.000367	4
chr11	54509521	54509845	202	chr11	54509621	54509635	-	3.65e-05	4
chr11	54509521	54509845	202	chr11	54509609	54509623	-	0.000998	4
chr11	54509521	54509845	202	chr11	54509761	54509775	+	0.000116	4
chr11	107678506	107678903	203	chr11	107678722	107678736	-	3.12e-05	4
chr11	107678506	107678903	203	chr11	107678635	107678649	+	0.000883	4
chr11	107678506	107678903	203	chr11	107678541	107678555	-	0.000254	4
chr11	107678506	107678903	203	chr11	107678745	107678759	-	0.000141	4
chr6	113232023	113232309	204	chr6	113232153	113232167	-	9.85e-05	1
chr1	17135550	17135889	205	chr1	17135708	17135722	-	6.08e-07	1
chr1	74904716	74905018	206	chr1	74904825	74904839	+	0.000998	4
chr1	74904716	74905018	206	chr1	74904803	74904817	+	9.44e-05	4
chr1	74904716	74905018	206	chr1	74904787	74904801	-	0.000506	4
chr1	74904716	74905018	206	chr1	74904981	74904995	-	0.000153	4
chr2	98506298	98507614	207	chr2	98506907	98506921	+	0.000883	7
chr2	98506298	98507614	207	chr2	98506400	98506414	+	0.000968	7
chr2	98506298	98507614	207	chr2	98506815	98506829	-	0.000206	7
chr2	98506298	98507614	207	chr2	98506699	98506713	-	0.000333	7
chr2	98506298	98507614	207	chr2	98506641	98506655	+	0.000968	7
chr2	98506298	98507614	207	chr2	98507141	98507155	+	0.000883	7
chr2	98506298	98507614	207	chr2	98507392	98507406	+	0.000883	7
chr9	106558542	106558916	208	chr9	106558656	106558670	+	2.47e-07	2
chr9	106558542	106558916	208	chr9	106558779	106558793	-	0.000312	2
chr8	124285485	124285788	209	chr8	124285578	124285592	+	1.24e-06	4
chr8	124285485	124285788	209	chr8	124285512	124285526	-	0.000103	4
chr8	124285485	124285788	209	chr8	124285622	124285636	-	0.000856	4
chr8	124285485	124285788	209	chr8	124285695	124285709	-	0.000198	4
chr5	142461070	142461376	210	chr5	142461173	142461187	+	3.12e-05	1
chr6	119270565	119270884	211	chr6	119270774	119270788	+	0.000629	3
chr6	119270565	119270884	211	chr6	119270694	119270708	+	2.5e-05	3
chr6	119270565	119270884	211	chr6	119270793	119270807	-	9.83e-06	3
chr4	125512524	125512841	212	chr4	125512665	125512679	-	1.87e-05	2
chr4	125512524	125512841	212	chr4	125512586	125512600	+	0.000263	2
chr8	9635319	9635620	213	chr8	9635414	9635428	+	0.000191	4
chr8	9635319	9635620	213	chr8	9635377	9635391	-	0.000805	4
chr8	9635319	9635620	213	chr8	9635402	9635416	+	9.44e-05	4
chr8	9635319	9635620	213	chr8	9635439	9635453	+	9.44e-05	4
chr4	154392826	154393240	214	chr4	154393072	154393086	-	3.46e-05	8
chr4	154392826	154393240	214	chr4	154393058	154393072	-	0.00046	8
chr4	154392826	154393240	214	chr4	154392968	154392982	-	0.000734	8
chr4	154392826	154393240	214	chr4	154392941	154392955	+	1.12e-05	8
chr4	154392826	154393240	214	chr4	154393018	154393032	+	0.000301	8
chr4	154392826	154393240	214	chr4	154393196	154393210	+	0.000153	8
chr4	154392826	154393240	214	chr4	154393095	154393109	-	0.000344	8
chr4	154392826	154393240	214	chr4	154393221	154393235	-	0.000312	8
chr4	133524358	133524686	215	chr4	133524476	133524490	+	6.01e-06	5
chr4	133524358	133524686	215	chr4	133524430	133524444	+	0.000939	5
chr4	133524358	133524686	215	chr4	133524386	133524400	-	9.85e-05	5
chr4	133524358	133524686	215	chr4	133524391	133524405	+	0.00061	5
chr4	133524358	133524686	215	chr4	133524652	133524666	+	0.000831	5
chr5	116995806	116996103	216	chr5	116995938	116995952	-	1.73e-07	3
chr5	116995806	116996103	216	chr5	116995817	116995831	-	6.3e-05	3
chr5	116995806	116996103	216	chr5	116996009	116996023	-	0.000131	3
chr6	103703963	103704293	217	chr6	103704110	103704124	+	1.02e-06	5
chr6	103703963	103704293	217	chr6	103704043	103704057	+	0.000291	5
chr6	103703963	103704293	217	chr6	103704057	103704071	+	8.29e-07	5
chr6	103703963	103704293	217	chr6	103704105	103704119	-	0.000263	5
chr6	103703963	103704293	217	chr6	103704208	103704222	+	0.000522	5
chr8	125938201	125938530	218	chr8	125938300	125938314	+	0.000198	3
chr8	125938201	125938530	218	chr8	125938363	125938377	-	2.37e-05	3
chr8	125938201	125938530	218	chr8	125938351	125938365	-	0.00046	3
chr7	106797284	106797589	219	chr7	106797337	106797351	-	2.65e-05	2
chr7	106797284	106797589	219	chr7	106797383	106797397	+	2.09e-08	2
chr6	28932325	28932788	220	chr6	28932588	28932602	+	0.000405	3
chr6	28932325	28932788	220	chr6	28932383	28932397	-	0.000475	3
chr6	28932325	28932788	220	chr6	28932614	28932628	-	8.29e-07	3
chr11	83234879	83235314	221	chr11	83235174	83235188	+	0.000379	5
chr11	83234879	83235314	221	chr11	83234984	83234998	+	1.79e-06	5
chr11	83234879	83235314	221	chr11	83235109	83235123	-	0.000237	5
chr11	83234879	83235314	221	chr11	83235193	83235207	+	4.71e-05	5
chr11	83234879	83235314	221	chr11	83235287	83235301	+	0.000556	5
chr14	68743644	68743952	222	chr14	68743788	68743802	-	1.49e-06	2
chr14	68743644	68743952	222	chr14	68743694	68743708	-	0.000282	2
chr2	94085557	94086020	223	chr2	94085709	94085723	-	4.91e-07	1
chr12	106504392	106504690	224	chr12	106504490	106504504	+	3e-06	2
chr12	106504392	106504690	224	chr12	106504562	106504576	+	0.000574	2
chr11	102254645	102254945	225	chr11	102254773	102254787	-	2.37e-05	1
chr3	66777690	66778007	226	chr3	66777799	66777813	+	3.92e-07	2
chr3	66777690	66778007	226	chr3	66777703	66777717	-	0.00049	2
chr5	137506913	137507283	227	chr5	137507070	137507084	+	0.000333	3
chr5	137506913	137507283	227	chr5	137507065	137507079	-	5.46e-05	3
chr5	137506913	137507283	227	chr5	137507097	137507111	+	0.000333	3
chr18	38216059	38216365	228	chr18	38216194	38216208	-	0.000333	2
chr18	38216059	38216365	228	chr18	38216296	38216310	-	0.000301	2
chr11	118788469	118788751	229	chr11	118788707	118788721	+	0.000322	3
chr11	118788469	118788751	229	chr11	118788562	118788576	+	2.8e-05	3
chr11	118788469	118788751	229	chr11	118788657	118788671	-	0.000213	3
chr9	49149189	49149539	230	chr9	49149434	49149448	+	1.65e-05	3
chr9	49149189	49149539	230	chr9	49149300	49149314	+	6.01e-05	3
chr9	49149189	49149539	230	chr9	49149326	49149340	+	0.000246	3
chr15	79906546	79907504	231	chr15	79906717	79906731	+	0.000165	4
chr15	79906546	79907504	231	chr15	79906646	79906660	+	0.000998	4
chr15	79906546	79907504	231	chr15	79906756	79906770	+	2.23e-05	4
chr15	79906546	79907504	231	chr15	79907166	79907180	-	0.000856	4
chr5	108978420	108978861	232	chr5	108978701	108978715	-	5.65e-08	2
chr5	108978420	108978861	232	chr5	108978623	108978637	-	0.00091	2
chr18	37377862	37378172	233	chr18	37378103	37378117	-	0.000998	4
chr18	37377862	37378172	233	chr18	37377967	37377981	+	0.000475	4
chr18	37377862	37378172	233	chr18	37377973	37377987	+	6.6e-05	4
chr18	37377862	37378172	233	chr18	37378029	37378043	-	0.000757	4
chr19	5841363	5841980	234	chr19	5841836	5841850	+	0.000968	2
chr19	5841363	5841980	234	chr19	5841420	5841434	-	0.000322	2
chr11	103782044	103782332	235	chr11	103782156	103782170	-	1.76e-05	2
chr11	103782044	103782332	235	chr11	103782144	103782158	-	0.00091	2
chr15	78543493	78543791	236	chr15	78543632	78543646	+	0.000131	2
chr15	78543493	78543791	236	chr15	78543608	78543622	+	1.12e-05	2
chr15	82751582	82751934	237	chr15	82751718	82751732	+	6.08e-07	2
chr15	82751582	82751934	237	chr15	82751854	82751868	-	0.000312	2
chr12	56373347	56373667	238	chr12	56373409	56373423	+	7.96e-09	4
chr12	56373347	56373667	238	chr12	56373456	56373470	+	3.13e-08	4
chr12	56373347	56373667	238	chr12	56373417	56373431	-	8.66e-05	4
chr12	56373347	56373667	238	chr12	56373508	56373522	+	1.34e-07	4
chr5	65858187	65858541	239	chr5	65858388	65858402	+	1.92e-07	3
chr5	65858187	65858541	239	chr5	65858307	65858321	+	8.29e-07	3
chr5	65858187	65858541	239	chr5	65858374	65858388	+	0.000301	3
chr5	116396002	116396302	240	chr5	116396131	116396145	-	7.73e-08	3
chr5	116396002	116396302	240	chr5	116396281	116396295	+	4.48e-05	3
chr5	116396002	116396302	240	chr5	116396196	116396210	+	0.000356	3
chr19	5842358	5843179	241	chr19	5842763	5842777	+	0.00049	2
chr19	5842358	5843179	241	chr19	5842440	5842454	+	0.000757	2
chr5	117714796	117715106	242	chr5	117714904	117714918	+	8.29e-07	1
chr2	91761370	91761688	243	chr2	91761580	91761594	+	0.000141	4
chr2	91761370	91761688	243	chr2	91761461	91761475	+	0.000968	4
chr2	91761370	91761688	243	chr2	91761489	91761503	+	6.3e-05	4
chr2	91761370	91761688	243	chr2	91761645	91761659	-	0.000539	4
chr11	77302182	77302546	244	chr11	77302433	77302447	+	8.02e-06	3
chr11	77302182	77302546	244	chr11	77302327	77302341	-	1.37e-05	3
chr11	77302182	77302546	244	chr11	77302348	77302362	-	0.000734	3
chr9	40614457	40615241	245	chr9	40614630	40614644	+	0.000691	2
chr9	40614457	40615241	245	chr9	40614685	40614699	-	0.000165	2
chr2	158396171	158396451	246	chr2	158396274	158396288	+	6.74e-07	2
chr2	158396171	158396451	246	chr2	158396419	158396433	-	0.000356	2
chr8	9309538	9309864	247	chr8	9309638	9309652	+	3.29e-05	1
chr5	23922273	23922648	248	chr5	23922378	23922392	+	0.000367	2
chr5	23922273	23922648	248	chr5	23922418	23922432	+	1.96e-06	2
chr18	77656299	77656596	249	chr18	77656429	77656443	-	5.47e-07	1
chr9	43767685	43768017	250	chr9	43767985	43767999	-	0.000184	3
chr9	43767685	43768017	250	chr9	43767722	43767736	+	0.000649	3
chr9	43767685	43768017	250	chr9	43767817	43767831	+	8.98e-08	3
chr10	127684468	127684791	251	chr10	127684775	127684789	+	0.000781	4
chr10	127684468	127684791	251	chr10	127684586	127684600	+	7.46e-06	4
chr10	127684468	127684791	251	chr10	127684685	127684699	-	0.000246	4
chr10	127684468	127684791	251	chr10	127684769	127684783	+	0.000831	4
chr2	29563787	29564084	252	chr2	29563895	29563909	+	0.000121	1
chr4	123994409	123994731	253	chr4	123994464	123994478	-	0.000649	3
chr4	123994409	123994731	253	chr4	123994521	123994535	+	1.19e-07	3
chr4	123994409	123994731	253	chr4	123994663	123994677	+	0.000522	3
chr9	89632216	89632550	254	chr9	89632323	89632337	-	0.00091	2
chr9	89632216	89632550	254	chr9	89632332	89632346	+	2.95e-05	2
chr5	110987417	110987705	255	chr5	110987554	110987568	-	2.6e-08	3
chr5	110987417	110987705	255	chr5	110987513	110987527	+	0.000147	3
chr5	110987417	110987705	255	chr5	110987619	110987633	+	0.000379	3
chr11	107781492	107781757	256	chr11	107781604	107781618	+	1.12e-06	3
chr11	107781492	107781757	256	chr11	107781599	107781613	-	6.01e-05	3
chr11	107781492	107781757	256	chr11	107781622	107781636	-	4.92e-08	3
chr1	137531438	137531727	257	chr1	137531704	137531718	+	0.000998	2
chr1	137531438	137531727	257	chr1	137531555	137531569	-	9.64e-10	2
chr7	16769121	16769436	258	chr7	16769300	16769314	+	6.6e-05	2
chr7	16769121	16769436	258	chr7	16769232	16769246	+	7.46e-06	2
chr2	26063671	26064013	259	chr2	26063791	26063805	+	1.05e-05	2
chr2	26063671	26064013	259	chr2	26063857	26063871	+	0.000392	2
chr2	29429151	29429453	260	chr2	29429353	29429367	-	0.000968	3
chr2	29429151	29429453	260	chr2	29429297	29429311	-	9.2e-06	3
chr2	29429151	29429453	260	chr2	29429177	29429191	+	0.000392	3
chr2	143372579	143373114	261	chr2	143372720	143372734	-	0.000344	4
chr2	143372579	143373114	261	chr2	143372677	143372691	+	2.37e-05	4
chr2	143372579	143373114	261	chr2	143372954	143372968	+	4.26e-05	4
chr2	143372579	143373114	261	chr2	143373032	143373046	-	9.04e-05	4
chr11	35612416	35612745	262	chr11	35612565	35612579	-	6.01e-06	3
chr11	35612416	35612745	262	chr11	35612513	35612527	-	0.000418	3
chr11	35612416	35612745	262	chr11	35612501	35612515	-	0.000506	3
chr4	120538972	120539286	263	chr4	120539073	120539087	+	7.46e-06	2
chr4	120538972	120539286	263	chr4	120539094	120539108	+	1.65e-05	2
chr5	37634672	37635006	264	chr5	37634735	37634749	-	0.000506	3
chr5	37634672	37635006	264	chr5	37634808	37634822	+	1.46e-05	3
chr5	37634672	37635006	264	chr5	37634867	37634881	+	0.000939	3
chr5	113836431	113836770	265	chr5	113836562	113836576	-	7.24e-05	2
chr5	113836431	113836770	265	chr5	113836651	113836665	+	0.000506	2
chr7	88609056	88609355	266	chr7	88609186	88609200	-	0.000344	2
chr7	88609056	88609355	266	chr7	88609221	88609235	-	0.000141	2
chr19	42400467	42400774	267	chr19	42400542	42400556	+	9.85e-05	2
chr19	42400467	42400774	267	chr19	42400580	42400594	+	0.000237	2
chr4	138153771	138154068	268	chr4	138153842	138153856	-	0.000592	4
chr4	138153771	138154068	268	chr4	138153902	138153916	-	2.6e-08	4
chr4	138153771	138154068	268	chr4	138153887	138153901	+	0.000344	4
chr4	138153771	138154068	268	chr4	138154028	138154042	+	0.000432	4
chr4	125180190	125180485	269	chr4	125180463	125180477	-	2.11e-05	2
chr4	125180190	125180485	269	chr4	125180314	125180328	-	9.04e-05	2
chr4	125196161	125196456	270	chr4	125196314	125196328	-	2.11e-05	2
chr4	125196161	125196456	270	chr4	125196350	125196364	-	0.000111	2
chr12	3806292	3806700	271	chr12	3806323	3806337	+	0.000831	3
chr12	3806292	3806700	271	chr12	3806545	3806559	+	1.76e-05	3
chr12	3806292	3806700	271	chr12	3806387	3806401	+	6.6e-05	3
chr10	80500145	80500448	272	chr10	80500271	80500285	+	1.92e-07	2
chr10	80500145	80500448	272	chr10	80500166	80500180	-	0.000506	2
chr7	26091408	26091718	273	chr7	26091536	26091550	-	1.05e-05	3
chr7	26091408	26091718	273	chr7	26091506	26091520	-	0.000539	3
chr7	26091408	26091718	273	chr7	26091451	26091465	+	0.000831	3
chr5	23863311	23863634	274	chr5	23863394	23863408	-	0.000629	6
chr5	23863311	23863634	274	chr5	23863458	23863472	+	0.000998	6
chr5	23863311	23863634	274	chr5	23863426	23863440	+	8.66e-05	6
chr5	23863311	23863634	274	chr5	23863453	23863467	-	0.000998	6
chr5	23863311	23863634	274	chr5	23863532	23863546	+	0.000344	6
chr5	23863311	23863634	274	chr5	23863505	23863519	+	0.000856	6
chr1	84692817	84693124	275	chr1	84692835	84692849	+	0.000272	1
chr7	16733048	16733350	276	chr7	16733181	16733195	-	6.01e-06	1
chr5	37406752	37407176	277	chr5	37407016	37407030	-	1.79e-06	4
chr5	37406752	37407176	277	chr5	37406773	37406787	+	0.000229	4
chr5	37406752	37407176	277	chr5	37407038	37407052	+	0.000883	4
chr5	37406752	37407176	277	chr5	37407160	37407174	-	0.000629	4
chr6	48086914	48087220	278	chr6	48087135	48087149	-	0.00091	3
chr6	48086914	48087220	278	chr6	48087000	48087014	-	0.000998	3
chr6	48086914	48087220	278	chr6	48087048	48087062	-	8.98e-08	3
chr10	40791628	40791960	279	chr10	40791720	40791734	+	3.12e-05	1
chr2	178935282	178935642	280	chr2	178935395	178935409	+	5.47e-07	5
chr2	178935282	178935642	280	chr2	178935388	178935402	-	0.000272	5
chr2	178935282	178935642	280	chr2	178935433	178935447	-	0.000229	5
chr2	178935282	178935642	280	chr2	178935440	178935454	+	5.47e-07	5
chr2	178935282	178935642	280	chr2	178935570	178935584	+	0.000939	5
chr11	118520648	118520974	281	chr11	118520796	118520810	-	3.53e-06	1
chr16	57391531	57391938	282	chr16	57391670	57391684	-	0.000669	2
chr16	57391531	57391938	282	chr16	57391814	57391828	-	0.000831	2
chr8	72641605	72641901	283	chr8	72641711	72641725	+	0.000574	1
chr8	77375797	77376089	284	chr8	77375887	77375901	-	3.25e-06	4
chr8	77375797	77376089	284	chr8	77375853	77375867	+	0.000805	4
chr8	77375797	77376089	284	chr8	77375913	77375927	-	1.73e-07	4
chr8	77375797	77376089	284	chr8	77376038	77376052	+	0.000198	4
chr9	40077188	40077521	285	chr9	40077324	40077338	+	8.28e-05	2
chr9	40077188	40077521	285	chr9	40077210	40077224	-	0.000883	2
chr7	31269314	31269668	286	chr7	31269405	31269419	+	2.37e-05	3
chr7	31269314	31269668	286	chr7	31269560	31269574	+	0.000392	3
chr7	31269314	31269668	286	chr7	31269439	31269453	+	3.82e-06	3
chr4	124537786	124538078	287	chr4	124537848	124537862	-	3.84e-05	3
chr4	124537786	124538078	287	chr4	124538028	124538042	-	0.00061	3
chr4	124537786	124538078	287	chr4	124537885	124537899	+	9.21e-07	3
chr12	88325139	88325465	288	chr12	88325308	88325322	-	5.47e-07	2
chr12	88325139	88325465	288	chr12	88325152	88325166	-	0.000831	2
chr4	115401379	115401682	289	chr4	115401538	115401552	-	0.000206	2
chr4	115401379	115401682	289	chr4	115401516	115401530	-	2.6e-08	2
chr5	127131814	127132120	290	chr5	127131923	127131937	+	0.000282	1
chr19	47080905	47081184	291	chr19	47081003	47081017	+	5.6e-06	2
chr19	47080905	47081184	291	chr19	47080957	47080971	-	0.00091	2
chr12	87554130	87554386	292	chr12	87554206	87554220	+	2.6e-08	2
chr12	87554130	87554386	292	chr12	87554191	87554205	-	0.000322	2
chr2	29165579	29165845	293	chr2	29165676	29165690	+	1.28e-05	2
chr2	29165579	29165845	293	chr2	29165643	29165657	-	0.000831	2
chr2	70397648	70397948	294	chr2	70397754	70397768	+	3e-06	2
chr2	70397648	70397948	294	chr2	70397733	70397747	-	6.01e-05	2
chr11	74986463	74987200	295	chr11	74986802	74986816	+	0.000734	4
chr11	74986463	74987200	295	chr11	74986665	74986679	+	2.11e-05	4
chr11	74986463	74987200	295	chr11	74986580	74986594	+	0.000998	4
chr11	74986463	74987200	295	chr11	74987023	74987037	+	7.24e-05	4
chr11	78309440	78309798	296	chr11	78309655	78309669	+	0.000629	3
chr11	78309440	78309798	296	chr11	78309494	78309508	+	0.000379	3
chr11	78309440	78309798	296	chr11	78309581	78309595	+	0.000159	3
chr18	76770782	76771209	297	chr18	76770877	76770891	+	0.000883	2
chr18	76770782	76771209	297	chr18	76770915	76770929	-	0.000883	2
chr1	79436456	79436769	298	chr1	79436493	79436507	+	9.44e-05	2
chr1	79436456	79436769	298	chr1	79436605	79436619	-	4.47e-06	2
chr5	113253455	113253751	299	chr5	113253589	113253603	-	3.11e-07	2
chr5	113253455	113253751	299	chr5	113253503	113253517	+	2.23e-05	2
chr11	3976732	3976987	300	chr11	3976837	3976851	-	1.37e-05	1
chr4	153281714	153282043	301	chr4	153281920	153281934	-	0.000153	3
chr4	153281714	153282043	301	chr4	153281739	153281753	-	1.98e-05	3
chr4	153281714	153282043	301	chr4	153281902	153281916	-	6.48e-06	3
chr5	147456204	147456521	302	chr5	147456320	147456334	+	1.28e-05	1
chr8	10255832	10256097	303	chr8	10255913	10255927	-	7.47e-07	2
chr8	10255832	10256097	303	chr8	10255957	10255971	-	5.6e-06	2
chr5	117041408	117041705	304	chr5	117041563	117041577	+	9.83e-06	3
chr5	117041408	117041705	304	chr5	117041417	117041431	+	0.000322	3
chr5	117041408	117041705	304	chr5	117041503	117041517	+	8.02e-06	3
chr12	29515954	29516258	305	chr12	29516174	29516188	-	0.000246	2
chr12	29515954	29516258	305	chr12	29516082	29516096	-	2.11e-05	2
chr5	118294696	118295002	306	chr5	118294817	118294831	+	6.58e-08	1
chr18	68851645	68851971	307	.	.	.	.	.	0
chr14	13362783	13363107	308	chr14	13362802	13362816	-	3.65e-05	2
chr14	13362783	13363107	308	chr14	13362892	13362906	+	2.65e-05	2
chr2	178469869	178470164	309	chr2	178469896	178469910	+	0.000883	2
chr2	178469869	178470164	309	chr2	178469991	178470005	-	8.02e-06	2
chr7	19953776	19954086	310	chr7	19953915	19953929	-	2.95e-05	1
chr2	157489392	157489674	311	chr2	157489412	157489426	+	0.000272	2
chr2	157489392	157489674	311	chr2	157489511	157489525	-	2.11e-05	2
chr15	76352570	76352836	312	chr15	76352721	76352735	-	0.000539	3
chr15	76352570	76352836	312	chr15	76352709	76352723	-	0.000968	3
chr15	76352570	76352836	312	chr15	76352755	76352769	-	0.000805	3
chr10	3557521	3557862	313	chr10	3557592	3557606	-	0.000574	3
chr10	3557521	3557862	313	chr10	3557654	3557668	+	7.46e-06	3
chr10	3557521	3557862	313	chr10	3557808	3557822	-	0.000629	3
chr11	101463840	101464171	314	chr11	101463946	101463960	-	0.000522	2
chr11	101463840	101464171	314	chr11	101463993	101464007	-	2.34e-06	2
chr5	37287474	37287788	315	chr5	37287613	37287627	-	5.6e-06	2
chr5	37287474	37287788	315	chr5	37287509	37287523	-	0.000669	2
chr13	24082786	24083124	316	chr13	24082890	24082904	+	0.000312	1
chr19	45172432	45172754	317	chr19	45172504	45172518	-	0.000939	3
chr19	45172432	45172754	317	chr19	45172528	45172542	+	2.5e-05	3
chr19	45172432	45172754	317	chr19	45172681	45172695	+	0.000107	3
chr5	143170650	143170942	318	chr5	143170730	143170744	+	0.000344	2
chr5	143170650	143170942	318	chr5	143170757	143170771	+	1.12e-05	2
chr4	44273268	44273585	319	chr4	44273386	44273400	+	4.05e-05	1
chr10	129717116	129717438	320	chr10	129717220	129717234	-	0.000301	4
chr10	129717116	129717438	320	chr10	129717210	129717224	+	0.000556	4
chr10	129717116	129717438	320	chr10	129717321	129717335	+	0.000206	4
chr10	129717116	129717438	320	chr10	129717261	129717275	-	0.000103	4
chr9	74716228	74716527	321	chr9	74716360	74716374	-	3.5e-07	3
chr9	74716228	74716527	321	chr9	74716312	74716326	+	0.000712	3
chr9	74716228	74716527	321	chr9	74716397	74716411	+	5.46e-05	3
chr7	51849246	51849564	322	chr7	51849530	51849544	+	0.00049	3
chr7	51849246	51849564	322	chr7	51849356	51849370	+	2.6e-08	3
chr7	51849246	51849564	322	chr7	51849462	51849476	+	0.00091	3
chr7	51879130	51879454	323	chr7	51879228	51879242	+	6.74e-07	3
chr7	51879130	51879454	323	chr7	51879287	51879301	-	0.000392	3
chr7	51879130	51879454	323	chr7	51879295	51879309	-	0.000574	3
chr5	26862140	26862468	324	chr5	26862298	26862312	-	1.28e-05	2
chr5	26862140	26862468	324	chr5	26862170	26862184	-	0.000556	2
chr5	136282635	136282960	325	chr5	136282745	136282759	+	3.11e-07	1
chr7	25793754	25794064	326	chr7	25793886	25793900	-	1.12e-05	2
chr7	25793754	25794064	326	chr7	25793765	25793779	-	0.000939	2
chr7	136081580	136081897	327	chr7	136081735	136081749	-	9.44e-05	1
chr8	98503247	98503525	328	chr8	98503346	98503360	+	1.96e-06	1
chr4	44524625	44524929	329	chr4	44524758	44524772	-	3.12e-05	2
chr4	44524625	44524929	329	chr4	44524681	44524695	-	8.28e-05	2
chr10	70891080	70891412	330	chr10	70891159	70891173	+	0.000592	2
chr10	70891080	70891412	330	chr10	70891178	70891192	+	3.53e-06	2
chr11	40414072	40414477	331	chr11	40414416	40414430	+	0.000116	3
chr11	40414072	40414477	331	chr11	40414179	40414193	+	1.98e-05	3
chr11	40414072	40414477	331	chr11	40414255	40414269	+	0.000998	3
chr1	117581179	117581519	332	chr1	117581447	117581461	-	9.04e-05	3
chr1	117581179	117581519	332	chr1	117581289	117581303	+	1.56e-05	3
chr1	117581179	117581519	332	chr1	117581371	117581385	+	0.00049	3
chr16	91011717	91012025	333	chr16	91011844	91011858	+	8.29e-07	2
chr16	91011717	91012025	333	chr16	91011882	91011896	+	0.000883	2
chr9	57315892	57316236	334	chr9	57316192	57316206	-	0.000781	2
chr9	57315892	57316236	334	chr9	57316000	57316014	+	4.82e-06	2
chr4	150560604	150560914	335	chr4	150560610	150560624	+	0.000522	2
chr4	150560604	150560914	335	chr4	150560746	150560760	-	4.47e-06	2
chr8	126415244	126415545	336	chr8	126415377	126415391	-	0.000856	2
chr8	126415244	126415545	336	chr8	126415389	126415403	-	0.000506	2
chr11	100620211	100620555	337	chr11	100620312	100620326	+	0.000379	2
chr11	100620211	100620555	337	chr11	100620320	100620334	+	1.2e-05	2
chr7	134093399	134093738	338	chr7	134093506	134093520	+	2.34e-06	1
chr9	46450830	46451166	339	chr9	46450981	46450995	-	3.29e-05	1
chr4	88959423	88959753	340	chr4	88959572	88959586	-	1.28e-05	1
chr5	116968149	116968459	341	chr5	116968259	116968273	+	0.000103	1
chr19	38602057	38602367	342	chr19	38602109	38602123	-	0.000669	3
chr19	38602057	38602367	342	chr19	38602216	38602230	+	6.01e-05	3
chr19	38602057	38602367	342	chr19	38602180	38602194	+	0.000221	3
chr2	158420901	158421182	343	chr2	158421005	158421019	+	5.05e-09	1
chrX	7372227	7372540	344	chrX	7372314	7372328	-	4.71e-05	3
chrX	7372227	7372540	344	chrX	7372235	7372249	-	0.000356	3
chrX	7372227	7372540	344	chrX	7372335	7372349	+	4.71e-05	3
chr4	150663018	150663630	345	chr4	150663281	150663295	-	8.02e-06	11
chr4	150663018	150663630	345	chr4	150663269	150663283	-	0.000392	11
chr4	150663018	150663630	345	chr4	150663113	150663127	-	0.000805	11
chr4	150663018	150663630	345	chr4	150663125	150663139	-	9.2e-06	11
chr4	150663018	150663630	345	chr4	150663216	150663230	+	0.00091	11
chr4	150663018	150663630	345	chr4	150663491	150663505	-	7.93e-05	11
chr4	150663018	150663630	345	chr4	150663374	150663388	-	7.93e-05	11
chr4	150663018	150663630	345	chr4	150663449	150663463	+	0.000367	11
chr4	150663018	150663630	345	chr4	150663479	150663493	-	0.000191	11
chr4	150663018	150663630	345	chr4	150663518	150663532	-	9.83e-06	11
chr4	150663018	150663630	345	chr4	150663596	150663610	-	0.000539	11
chr1	179313027	179313362	346	chr1	179313148	179313162	+	1.73e-07	2
chr1	179313027	179313362	346	chr1	179313075	179313089	+	0.000333	2
chr6	113831892	113832205	347	chr6	113832032	113832046	-	9.21e-07	1
chr15	85295694	85295974	348	chr15	85295793	85295807	+	1.49e-06	1
chr5	121459489	121459787	349	chr5	121459630	121459644	-	1.12e-05	1
chr4	61918033	61918341	350	chr4	61918162	61918176	+	3.74e-08	2
chr4	61918033	61918341	350	chr4	61918200	61918214	+	0.00091	2
chr12	87888792	87889141	351	chr12	87888989	87889003	+	0.000856	2
chr12	87888792	87889141	351	chr12	87888951	87888965	-	2.37e-05	2
chr9	108728076	108728427	352	chr9	108728256	108728270	-	0.000379	1
chr10	76440880	76441188	353	chr10	76440971	76440985	+	5.2e-06	1
chr7	88638239	88638514	354	chr7	88638336	88638350	+	7.73e-08	1
chr6	147217003	147217298	355	chr6	147217119	147217133	+	6.74e-07	2
chr6	147217003	147217298	355	chr6	147217248	147217262	-	0.000574	2
chr3	96132413	96133248	356	.	.	.	.	.	0
chr15	34767083	34767369	357	chr15	34767195	34767209	+	4.26e-05	1
chr16	20765460	20765773	358	chr16	20765645	20765659	-	0.000831	3
chr16	20765460	20765773	358	chr16	20765578	20765592	+	0.000649	3
chr16	20765460	20765773	358	chr16	20765591	20765605	-	1.03e-07	3
chr2	163264882	163265297	359	chr2	163265083	163265097	+	0.000629	2
chr2	163264882	163265297	359	chr2	163265118	163265132	-	0.000263	2
chr10	90289745	90290039	360	chr10	90289865	90289879	-	1.96e-06	1
chr8	68127232	68127532	361	chr8	68127332	68127346	+	1.36e-06	1
chr2	104139403	104139696	362	chr2	104139451	104139465	+	0.000506	2
chr2	104139403	104139696	362	chr2	104139528	104139542	-	3.12e-05	2
chr17	73396412	73396692	363	chr17	73396439	73396453	-	0.000237	3
chr17	73396412	73396692	363	chr17	73396520	73396534	-	6.3e-05	3
chr17	73396412	73396692	363	chr17	73396471	73396485	-	0.000367	3
chr11	107547660	107547953	364	chr11	107547790	107547804	-	0.000237	3
chr11	107547660	107547953	364	chr11	107547677	107547691	+	0.000629	3
chr11	107547660	107547953	364	chr11	107547750	107547764	+	0.000126	3
chr7	97608829	97609233	365	chr7	97608908	97608922	-	0.000111	8
chr7	97608829	97609233	365	chr7	97608949	97608963	-	0.000165	8
chr7	97608829	97609233	365	chr7	97608929	97608943	-	0.000165	8
chr7	97608829	97609233	365	chr7	97609004	97609018	-	2.2e-07	8
chr7	97608829	97609233	365	chr7	97608963	97608977	-	0.000312	8
chr7	97608829	97609233	365	chr7	97609067	97609081	-	2.2e-07	8
chr7	97608829	97609233	365	chr7	97609025	97609039	-	0.000734	8
chr7	97608829	97609233	365	chr7	97609045	97609059	+	0.000968	8
chr18	77091867	77092139	366	chr18	77091886	77091900	+	0.00091	2
chr18	77091867	77092139	366	chr18	77091992	77092006	-	7.46e-06	2
chr4	9196568	9196899	367	chr4	9196715	9196729	-	1.51e-07	1
chr12	107353294	107353641	368	chr12	107353420	107353434	+	6.48e-06	2
chr12	107353294	107353641	368	chr12	107353432	107353446	+	0.000213	2
chr11	80146308	80146572	369	chr11	80146373	80146387	+	0.000126	5
chr11	80146308	80146572	369	chr11	80146348	80146362	-	0.000246	5
chr11	80146308	80146572	369	chr11	80146343	80146357	-	0.000831	5
chr11	80146308	80146572	369	chr11	80146550	80146564	+	0.000574	5
chr11	80146308	80146572	369	chr11	80146410	80146424	-	7.73e-08	5
chr16	10501983	10502285	370	chr16	10502107	10502121	-	2.6e-08	3
chr16	10501983	10502285	370	chr16	10502023	10502037	+	0.000191	3
chr16	10501983	10502285	370	chr16	10502134	10502148	+	0.000856	3
chr9	21212528	21212841	371	chr9	21212638	21212652	+	2.65e-05	3
chr9	21212528	21212841	371	chr9	21212533	21212547	-	0.000263	3
chr9	21212528	21212841	371	chr9	21212797	21212811	-	0.000757	3
chr4	125006087	125006402	372	chr4	125006245	125006259	-	4.13e-06	4
chr4	125006087	125006402	372	chr4	125006282	125006296	+	0.000556	4
chr4	125006087	125006402	372	chr4	125006260	125006274	+	0.000556	4
chr4	125006087	125006402	372	chr4	125006326	125006340	-	0.000506	4
chr5	37648530	37648809	373	chr5	37648681	37648695	-	6.48e-06	2
chr5	37648530	37648809	373	chr5	37648641	37648655	-	0.000263	2
chr18	38235056	38235363	374	chr18	38235187	38235201	-	1.37e-05	2
chr18	38235056	38235363	374	chr18	38235285	38235299	-	0.000734	2
chr5	136319380	136319687	375	chr5	136319472	136319486	+	0.000131	3
chr5	136319380	136319687	375	chr5	136319610	136319624	-	0.000574	3
chr5	136319380	136319687	375	chr5	136319626	136319640	+	0.000939	3
chr11	22948292	22948618	376	chr11	22948376	22948390	+	0.000539	2
chr11	22948292	22948618	376	chr11	22948302	22948316	+	0.000506	2
chr15	79622020	79622353	377	chr15	79622264	79622278	+	0.000883	2
chr15	79622020	79622353	377	chr15	79622127	79622141	+	6.01e-06	2
chr10	23502760	23504236	378	chr10	23502790	23502804	-	0.000159	5
chr10	23502760	23504236	378	chr10	23504078	23504092	-	0.000272	5
chr10	23502760	23504236	378	chr10	23504055	23504069	+	0.000432	5
chr10	23502760	23504236	378	chr10	23503713	23503727	-	0.000712	5
chr10	23502760	23504236	378	chr10	23503756	23503770	-	0.000805	5
chr9	56586150	56586471	379	chr9	56586302	56586316	-	0.000147	3
chr9	56586150	56586471	379	chr9	56586254	56586268	+	5.2e-06	3
chr9	56586150	56586471	379	chr9	56586424	56586438	-	0.000282	3
chr15	76552641	76552950	380	chr15	76552771	76552785	-	0.000322	3
chr15	76552641	76552950	380	chr15	76552756	76552770	-	0.000254	3
chr15	76552641	76552950	380	chr15	76552789	76552803	-	2.2e-07	3
chr5	112330802	112331100	381	chr5	112330841	112330855	-	0.000691	6
chr5	112330802	112331100	381	chr5	112330820	112330834	+	9.21e-07	6
chr5	112330802	112331100	381	chr5	112330908	112330922	+	5.2e-06	6
chr5	112330802	112331100	381	chr5	112330899	112330913	-	0.000367	6
chr5	112330802	112331100	381	chr5	112330869	112330883	+	0.000805	6
chr5	112330802	112331100	381	chr5	112331067	112331081	+	0.000522	6
chr6	117951400	117951715	382	chr6	117951507	117951521	+	9.2e-06	2
chr6	117951400	117951715	382	chr6	117951519	117951533	+	0.000649	2
chr4	151661106	151661399	383	chr4	151661345	151661359	+	0.000301	5
chr4	151661106	151661399	383	chr4	151661260	151661274	+	0.000712	5
chr4	151661106	151661399	383	chr4	151661181	151661195	-	0.000734	5
chr4	151661106	151661399	383	chr4	151661206	151661220	+	9.2e-06	5
chr4	151661106	151661399	383	chr4	151661348	151661362	-	0.000757	5
chr7	136613083	136613383	384	chr7	136613207	136613221	-	3.92e-07	1
chr8	126362514	126362772	385	chr8	126362754	126362768	-	0.00091	2
chr8	126362514	126362772	385	chr8	126362580	126362594	+	3e-06	2
chr5	27220978	27221273	386	chr5	27221121	27221135	-	0.000103	5
chr5	27220978	27221273	386	chr5	27221042	27221056	-	1.2e-05	5
chr5	27220978	27221273	386	chr5	27221078	27221092	+	9.44e-05	5
chr5	27220978	27221273	386	chr5	27221093	27221107	-	0.000939	5
chr5	27220978	27221273	386	chr5	27221152	27221166	+	0.000669	5
chr1	194862220	194862498	387	chr1	194862357	194862371	-	0.000184	2
chr1	194862220	194862498	387	chr1	194862405	194862419	+	0.00061	2
chr11	41813045	41813358	388	chr11	41813286	41813300	+	0.000171	5
chr11	41813045	41813358	388	chr11	41813152	41813166	+	2.8e-05	5
chr11	41813045	41813358	388	chr11	41813125	41813139	+	0.000171	5
chr11	41813045	41813358	388	chr11	41813147	41813161	-	0.000291	5
chr11	41813045	41813358	388	chr11	41813214	41813228	-	0.000178	5
chr7	4782168	4782472	389	chr7	4782269	4782283	+	0.000301	1
chr15	102165750	102166049	390	chr15	102165874	102165888	-	3.25e-06	1
chr19	41341047	41341353	391	chr19	41341151	41341165	+	4.48e-05	2
chr19	41341047	41341353	391	chr19	41341271	41341285	-	0.000883	2
chr7	32240865	32241230	392	chr7	32240995	32241009	+	9.44e-05	6
chr7	32240865	32241230	392	chr7	32240966	32240980	+	1.98e-05	6
chr7	32240865	32241230	392	chr7	32240868	32240882	-	0.000184	6
chr7	32240865	32241230	392	chr7	32241086	32241100	+	2.5e-05	6
chr7	32240865	32241230	392	chr7	32241108	32241122	+	0.000405	6
chr7	32240865	32241230	392	chr7	32241120	32241134	-	0.000446	6
chr4	138232475	138232745	393	chr4	138232589	138232603	-	2.11e-05	1
chr4	152563686	152563995	394	chr4	152563799	152563813	+	2.6e-08	1
chr10	42282094	42282415	395	chr10	42282257	42282271	-	1.76e-05	1
chr16	95217212	95217531	396	chr16	95217510	95217524	+	0.000556	1
chr7	4571649	4571956	397	chr7	4571829	4571843	-	0.000539	3
chr7	4571649	4571956	397	chr7	4571770	4571784	+	3.82e-06	3
chr7	4571649	4571956	397	chr7	4571926	4571940	-	0.00049	3
chr7	19536826	19537146	398	chr7	19536943	19536957	+	9.2e-06	2
chr7	19536826	19537146	398	chr7	19536861	19536875	-	0.000206	2
chr2	164791971	164792255	399	chr2	164792069	164792083	+	4.26e-05	1
chr11	119636490	119636782	400	chr11	119636580	119636594	+	6.48e-06	3
chr11	119636490	119636782	400	chr11	119636502	119636516	+	0.000539	3
chr11	119636490	119636782	400	chr11	119636754	119636768	-	7.58e-05	3
chr10	7445517	7445839	401	.	.	.	.	.	0
chr11	62418717	62419993	402	chr11	62419618	62419632	+	0.000757	7
chr11	62418717	62419993	402	chr11	62419170	62419184	+	0.000141	7
chr11	62418717	62419993	402	chr11	62419019	62419033	-	3.84e-05	7
chr11	62418717	62419993	402	chr11	62419237	62419251	+	0.000805	7
chr11	62418717	62419993	402	chr11	62419367	62419381	-	2.65e-05	7
chr11	62418717	62419993	402	chr11	62419414	62419428	+	0.00061	7
chr11	62418717	62419993	402	chr11	62419693	62419707	-	0.000691	7
chr7	31131706	31132013	403	chr7	31131895	31131909	+	0.000506	3
chr7	31131706	31132013	403	chr7	31131818	31131832	+	0.000539	3
chr7	31131706	31132013	403	chr7	31131833	31131847	-	0.000121	3
chr8	80955354	80955633	404	chr8	80955544	80955558	-	0.000418	3
chr8	80955354	80955633	404	chr8	80955451	80955465	+	0.000629	3
chr8	80955354	80955633	404	chr8	80955496	80955510	+	0.000856	3
chr5	25107095	25107471	405	chr5	25107301	25107315	+	0.00091	3
chr5	25107095	25107471	405	chr5	25107255	25107269	-	0.000184	3
chr5	25107095	25107471	405	chr5	25107226	25107240	+	2.11e-05	3
chr5	127952307	127952610	406	chr5	127952454	127952468	-	1.37e-05	2
chr5	127952307	127952610	406	chr5	127952376	127952390	+	0.000126	2
chr2	79294359	79294685	407	chr2	79294483	79294497	+	2.6e-08	1
chr11	84475562	84475842	408	chr11	84475671	84475685	-	1.87e-05	2
chr11	84475562	84475842	408	chr11	84475786	84475800	-	0.000781	2
chr4	124555218	124555513	409	chr4	124555246	124555260	-	0.000111	3
chr4	124555218	124555513	409	chr4	124555347	124555361	-	6.48e-06	3
chr4	124555218	124555513	409	chr4	124555318	124555332	+	0.00091	3
chr7	57165859	57166191	410	chr7	57165964	57165978	+	4.26e-05	1
chr7	58877128	58877469	411	chr7	58877229	58877243	+	0.000229	1
chr1	136561436	136561740	412	chr1	136561589	136561603	-	6.48e-06	2
chr1	136561436	136561740	412	chr1	136561493	136561507	+	0.000691	2
chr19	42471872	42472137	413	chr19	42471946	42471960	+	1.03e-07	2
chr19	42471872	42472137	413	chr19	42472003	42472017	-	0.000691	2
chr2	49359186	49359487	414	chr2	49359311	49359325	-	2.37e-05	1
chr19	47091080	47091357	415	chr19	47091164	47091178	+	5.2e-06	1
chr3	75878422	75878688	416	chr3	75878525	75878539	+	7.47e-07	1
chr5	114166675	114166984	417	chr5	114166721	114166735	+	0.000968	2
chr5	114166675	114166984	417	chr5	114166782	114166796	-	1.12e-05	2
chr2	180860839	180861136	418	chr2	180860914	180860928	+	0.000592	2
chr2	180860839	180861136	418	chr2	180860967	180860981	-	0.000184	2
chr9	119058801	119059093	419	chr9	119058918	119058932	-	6.95e-06	3
chr9	119058801	119059093	419	chr9	119058840	119058854	-	0.000121	3
chr9	119058801	119059093	419	chr9	119059075	119059089	+	0.000506	3
chr5	117364781	117365233	420	chr5	117365071	117365085	-	9.21e-07	1
chr18	36137199	36137489	421	chr18	36137323	36137337	-	3.11e-07	1
chr10	80940386	80940682	422	chr10	80940535	80940549	-	0.000392	2
chr10	80940386	80940682	422	chr10	80940482	80940496	+	3.46e-05	2
chr6	31257058	31257382	423	chr6	31257284	31257298	-	0.000998	3
chr6	31257058	31257382	423	chr6	31257216	31257230	-	2.65e-05	3
chr6	31257058	31257382	423	chr6	31257079	31257093	+	4.95e-05	3
chr11	80126154	80126472	424	chr11	80126248	80126262	+	0.000107	2
chr11	80126154	80126472	424	chr11	80126277	80126291	+	3.82e-06	2
chr13	111070163	111070555	425	chr13	111070252	111070266	-	5.46e-05	3
chr13	111070163	111070555	425	chr13	111070358	111070372	+	4.71e-05	3
chr13	111070163	111070555	425	chr13	111070530	111070544	-	0.00049	3
chr1	3660775	3661096	426	chr1	3660904	3660918	+	1.96e-06	3
chr1	3660775	3661096	426	chr1	3660844	3660858	+	0.000939	3
chr1	3660775	3661096	426	chr1	3661008	3661022	+	0.000805	3
chr1	74938181	74938474	427	chr1	74938303	74938317	-	0.000539	2
chr1	74938181	74938474	427	chr1	74938281	74938295	+	1.12e-05	2
chr7	25926900	25927213	428	chr7	25927016	25927030	+	6.58e-08	1
chr7	91233574	91233891	429	chr7	91233677	91233691	+	2.6e-08	3
chr7	91233574	91233891	429	chr7	91233798	91233812	-	0.000432	3
chr7	91233574	91233891	429	chr7	91233749	91233763	+	0.000198	3
chr2	165282302	165282591	430	chr2	165282403	165282417	+	1.65e-05	1
chr4	152731714	152732009	431	chr4	152731830	152731844	-	3.65e-05	3
chr4	152731714	152732009	431	chr4	152731815	152731829	+	0.000356	3
chr4	152731714	152732009	431	chr4	152731854	152731868	+	0.000574	3
chr15	74379894	74380194	432	chr15	74380035	74380049	-	4.26e-05	3
chr15	74379894	74380194	432	chr15	74380007	74380021	+	0.00091	3
chr15	74379894	74380194	432	chr15	74380108	74380122	-	0.000392	3
chr15	84796092	84796376	433	chr15	84796203	84796217	-	2.6e-08	2
chr15	84796092	84796376	433	chr15	84796191	84796205	-	0.000206	2
chr8	119697677	119697945	434	chr8	119697780	119697794	+	3e-06	4
chr8	119697677	119697945	434	chr8	119697793	119697807	+	0.000831	4
chr8	119697677	119697945	434	chr8	119697796	119697810	-	0.000475	4
chr8	119697677	119697945	434	chr8	119697862	119697876	-	0.000254	4
chr2	181048726	181049077	435	chr2	181048905	181048919	+	0.000312	1
chr12	110232985	110233274	436	chr12	110233068	110233082	+	1.63e-06	3
chr12	110232985	110233274	436	chr12	110233034	110233048	-	0.000556	3
chr12	110232985	110233274	436	chr12	110233136	110233150	+	0.000691	3
chr2	139921838	139922162	437	chr2	139921937	139921951	-	8.98e-08	6
chr2	139921838	139922162	437	chr2	139921855	139921869	-	0.000322	6
chr2	139921838	139922162	437	chr2	139921863	139921877	+	0.000691	6
chr2	139921838	139922162	437	chr2	139922004	139922018	-	0.000312	6
chr2	139921838	139922162	437	chr2	139921990	139922004	-	1.92e-07	6
chr2	139921838	139922162	437	chr2	139921971	139921985	-	0.00091	6
chr11	87734540	87734826	438	chr11	87734671	87734685	-	8.57e-06	5
chr11	87734540	87734826	438	chr11	87734659	87734673	-	0.000649	5
chr11	87734540	87734826	438	chr11	87734576	87734590	-	0.00061	5
chr11	87734540	87734826	438	chr11	87734699	87734713	-	0.000418	5
chr11	87734540	87734826	438	chr11	87734683	87734697	+	0.00049	5
chr1	38996542	38996812	439	chr1	38996774	38996788	-	0.000301	5
chr1	38996542	38996812	439	chr1	38996627	38996641	+	2.77e-06	5
chr1	38996542	38996812	439	chr1	38996545	38996559	-	0.000506	5
chr1	38996542	38996812	439	chr1	38996562	38996576	-	0.000159	5
chr1	38996542	38996812	439	chr1	38996570	38996584	+	0.000734	5
chr2	22600277	22600583	440	chr2	22600399	22600413	+	0.000781	1
chr11	84542799	84543075	441	chr11	84542911	84542925	+	5.47e-07	2
chr11	84542799	84543075	441	chr11	84542845	84542859	+	0.00091	2
chr13	42806964	42807278	442	chr13	42807091	42807105	+	6.95e-06	4
chr13	42806964	42807278	442	chr13	42807029	42807043	+	0.00049	4
chr13	42806964	42807278	442	chr13	42807057	42807071	-	0.000998	4
chr13	42806964	42807278	442	chr13	42807152	42807166	-	4.71e-05	4
chr15	95359134	95359432	443	chr15	95359213	95359227	-	4.95e-05	2
chr15	95359134	95359432	443	chr15	95359269	95359283	-	7.96e-09	2
chr14	80615681	80616031	444	chr14	80615823	80615837	-	0.000116	6
chr14	80615681	80616031	444	chr14	80615820	80615834	+	0.000475	6
chr14	80615681	80616031	444	chr14	80615981	80615995	-	0.000191	6
chr14	80615681	80616031	444	chr14	80615835	80615849	-	6.01e-05	6
chr14	80615681	80616031	444	chr14	80615865	80615879	-	0.000178	6
chr14	80615681	80616031	444	chr14	80615928	80615942	-	0.000998	6
chr8	23859395	23859685	445	chr8	23859502	23859516	+	6.92e-05	2
chr8	23859395	23859685	445	chr8	23859631	23859645	-	0.000856	2
chr12	34023084	34023423	446	chr12	34023238	34023252	-	1.12e-06	5
chr12	34023084	34023423	446	chr12	34023226	34023240	-	0.000263	5
chr12	34023084	34023423	446	chr12	34023136	34023150	+	0.000405	5
chr12	34023084	34023423	446	chr12	34023207	34023221	-	0.000153	5
chr12	34023084	34023423	446	chr12	34023212	34023226	-	0.000282	5
chr13	54472958	54473282	447	chr13	54473106	54473120	-	5.2e-06	4
chr13	54472958	54473282	447	chr13	54473069	54473083	-	0.00091	4
chr13	54472958	54473282	447	chr13	54473199	54473213	-	0.000805	4
chr13	54472958	54473282	447	chr13	54473244	54473258	-	0.000856	4
chr9	107284074	107284383	448	chr9	107284195	107284209	+	0.000213	3
chr9	107284074	107284383	448	chr9	107284213	107284227	-	3.65e-05	3
chr9	107284074	107284383	448	chr9	107284360	107284374	+	0.000669	3
chr11	55495922	55496204	449	chr11	55496029	55496043	+	1.76e-05	2
chr11	55495922	55496204	449	chr11	55496156	55496170	-	0.000116	2
chr7	130379018	130379290	450	chr7	130379217	130379231	+	0.000116	4
chr7	130379018	130379290	450	chr7	130379097	130379111	+	0.000506	4
chr7	130379018	130379290	450	chr7	130379047	130379061	-	0.000734	4
chr7	130379018	130379290	450	chr7	130379132	130379146	-	2.23e-05	4
chr5	37523163	37523486	451	chr5	37523266	37523280	+	5.2e-05	3
chr5	37523163	37523486	451	chr5	37523212	37523226	-	1.28e-05	3
chr5	37523163	37523486	451	chr5	37523360	37523374	-	0.000968	3
chr12	100279863	100280138	452	chr12	100279884	100279898	-	0.000367	2
chr12	100279863	100280138	452	chr12	100280060	100280074	+	0.000757	2
chr4	68616730	68617043	453	chr4	68616867	68616881	-	2.6e-08	1
chr6	33076604	33076936	454	chr6	33076682	33076696	-	0.000379	4
chr6	33076604	33076936	454	chr6	33076755	33076769	-	3.5e-07	4
chr6	33076604	33076936	454	chr6	33076687	33076701	+	0.000141	4
chr6	33076604	33076936	454	chr6	33076783	33076797	+	9.04e-05	4
chr7	3218572	3219787	455	chr7	3219083	3219097	+	0.00049	3
chr7	3218572	3219787	455	chr7	3219524	3219538	-	0.000379	3
chr7	3218572	3219787	455	chr7	3219506	3219520	+	0.000418	3
chr8	14393223	14393526	456	chr8	14393344	14393358	+	1.37e-05	2
chr8	14393223	14393526	456	chr8	14393365	14393379	-	0.000539	2
chr7	128873800	128874129	457	chr7	128873925	128873939	+	1.36e-06	3
chr7	128873800	128874129	457	chr7	128874097	128874111	-	0.000392	3
chr7	128873800	128874129	457	chr7	128874000	128874014	+	0.00091	3
chr8	90224323	90224607	458	chr8	90224425	90224439	+	3.84e-05	1
chr1	72583576	72583867	459	chr1	72583730	72583744	-	3.92e-07	2
chr1	72583576	72583867	459	chr1	72583842	72583856	-	0.000301	2
chr5	114003335	114003634	460	chr5	114003540	114003554	+	0.000629	3
chr5	114003335	114003634	460	chr5	114003467	114003481	-	4.13e-06	3
chr5	114003335	114003634	460	chr5	114003575	114003589	+	0.00091	3
chr2	180145774	180146038	461	chr2	180146011	180146025	+	5.73e-05	2
chr2	180145774	180146038	461	chr2	180145904	180145918	-	2.77e-06	2
chr4	44591517	44591858	462	chr4	44591654	44591668	+	9.2e-06	2
chr4	44591517	44591858	462	chr4	44591548	44591562	-	0.00061	2
chr4	47005764	47006086	463	chr4	47005907	47005921	-	8.98e-08	1
chr4	101222993	101223632	464	chr4	101223446	101223460	-	6.01e-05	7
chr4	101222993	101223632	464	chr4	101222996	101223010	+	0.000291	7
chr4	101222993	101223632	464	chr4	101223038	101223052	+	2.6e-08	7
chr4	101222993	101223632	464	chr4	101223335	101223349	-	0.000126	7
chr4	101222993	101223632	464	chr4	101223076	101223090	+	0.000883	7
chr4	101222993	101223632	464	chr4	101223195	101223209	+	0.00091	7
chr4	101222993	101223632	464	chr4	101223474	101223488	+	0.00061	7
chr4	109760535	109760824	465	chr4	109760641	109760655	+	2.11e-05	2
chr4	109760535	109760824	465	chr4	109760737	109760751	-	0.000126	2
chr15	77897016	77897306	466	chr15	77897192	77897206	-	0.00091	2
chr15	77897016	77897306	466	chr15	77897125	77897139	+	1.96e-06	2
chr8	72225725	72226009	467	chr8	72225757	72225771	+	0.000883	4
chr8	72225725	72226009	467	chr8	72225837	72225851	-	6.58e-08	4
chr8	72225725	72226009	467	chr8	72225966	72225980	-	0.000237	4
chr8	72225725	72226009	467	chr8	72225883	72225897	-	0.000998	4
chr19	38633374	38633671	468	chr19	38633503	38633517	-	1.87e-05	1
chr17	83410267	83410568	469	chr17	83410397	83410411	+	2.47e-07	2
chr17	83410267	83410568	469	chr17	83410354	83410368	+	8.29e-07	2
chr11	23031709	23031981	470	chr11	23031828	23031842	-	1.12e-06	1
chr4	119857301	119857586	471	chr4	119857506	119857520	+	0.00049	3
chr4	119857301	119857586	471	chr4	119857399	119857413	+	0.000184	3
chr4	119857301	119857586	471	chr4	119857315	119857329	+	0.000998	3
chr10	4707122	4707414	472	chr10	4707308	4707322	+	5.73e-05	2
chr10	4707122	4707414	472	chr10	4707214	4707228	+	0.000147	2
chr5	130839748	130839983	473	chr5	130839856	130839870	-	9.44e-05	1
chr2	65457915	65458190	474	chr2	65458028	65458042	-	1.12e-05	1
chr8	86551419	86551678	475	chr8	86551632	86551646	+	0.000432	2
chr8	86551419	86551678	475	chr8	86551528	86551542	-	4.48e-05	2
chr8	125261069	125261341	476	chr8	125261159	125261173	+	6.92e-05	3
chr8	125261069	125261341	476	chr8	125261201	125261215	+	0.000291	3
chr8	125261069	125261341	476	chr8	125261226	125261240	+	0.000691	3
chr5	122376534	122376804	477	chr5	122376583	122376597	-	0.000126	2
chr5	122376534	122376804	477	chr5	122376624	122376638	+	1.76e-05	2
chr3	86837129	86837595	478	chr3	86837424	86837438	-	0.000506	1
chr2	164794042	164794349	479	chr2	164794148	164794162	+	2.2e-07	2
chr2	164794042	164794349	479	chr2	164794320	164794334	+	0.000757	2
chr5	35874369	35874655	480	chr5	35874558	35874572	-	0.000432	5
chr5	35874369	35874655	480	chr5	35874445	35874459	-	0.000757	5
chr5	35874369	35874655	480	chr5	35874487	35874501	+	0.000939	5
chr5	35874369	35874655	480	chr5	35874465	35874479	+	1.05e-05	5
chr5	35874369	35874655	480	chr5	35874511	35874525	+	3.29e-05	5
chr2	180152494	180152748	481	chr2	180152624	180152638	+	0.000246	2
chr2	180152494	180152748	481	chr2	180152608	180152622	-	0.000103	2
chr9	42460906	42461157	482	chr9	42460989	42461003	+	2.6e-08	1
chr13	56996864	56997174	483	chr13	56996953	56996967	+	0.000126	2
chr13	56996864	56997174	483	chr13	56997022	56997036	+	0.000856	2
chr9	58689557	58689846	484	chr9	58689665	58689679	+	1.46e-05	2
chr9	58689557	58689846	484	chr9	58689758	58689772	-	0.000556	2
chr18	36164375	36164665	485	chr18	36164462	36164476	+	4.48e-05	2
chr18	36164375	36164665	485	chr18	36164479	36164493	+	0.000592	2
chr11	4663694	4663988	486	chr11	4663811	4663825	-	8.98e-08	2
chr11	4663694	4663988	486	chr11	4663937	4663951	+	0.000556	2
chr4	116875079	116875530	487	chr4	116875187	116875201	-	0.000246	4
chr4	116875079	116875530	487	chr4	116875140	116875154	+	0.000379	4
chr4	116875079	116875530	487	chr4	116875456	116875470	+	0.000691	4
chr4	116875079	116875530	487	chr4	116875322	116875336	+	0.000805	4
chr4	137232065	137232360	488	chr4	137232087	137232101	+	0.000446	3
chr4	137232065	137232360	488	chr4	137232160	137232174	+	2.14e-06	3
chr4	137232065	137232360	488	chr4	137232175	137232189	-	1.65e-05	3
chr15	74516160	74516458	489	chr15	74516296	74516310	-	4.05e-05	1
chr15	88980524	88980825	490	chr15	88980683	88980697	-	4.95e-05	1
chr10	60486279	60486584	491	chr10	60486485	60486499	-	0.000322	4
chr10	60486279	60486584	491	chr10	60486415	60486429	-	2.54e-06	4
chr10	60486279	60486584	491	chr10	60486351	60486365	-	2.37e-05	4
chr10	60486279	60486584	491	chr10	60486397	60486411	-	0.000213	4
chr2	171867620	171867911	492	chr2	171867768	171867782	-	5.2e-06	2
chr2	171867620	171867911	492	chr2	171867894	171867908	-	0.000574	2
chr2	180620033	180620309	493	chr2	180620147	180620161	-	8.57e-06	2
chr2	180620033	180620309	493	chr2	180620159	180620173	-	3e-06	2
chr11	83230642	83230913	494	chr11	83230764	83230778	-	4.95e-05	1
chr11	114513875	114514198	495	chr11	114514004	114514018	+	0.000418	1
chr2	162910624	162911462	496	chr2	162910773	162910787	-	0.000998	2
chr2	162910624	162911462	496	chr2	162911112	162911126	-	0.000805	2
chr7	145621660	145621943	497	chr7	145621749	145621763	-	0.000831	2
chr7	145621660	145621943	497	chr7	145621797	145621811	-	0.000126	2
chr5	117004002	117004280	498	chr5	117004113	117004127	-	0.000107	2
chr5	117004002	117004280	498	chr5	117004019	117004033	-	0.000237	2
chr18	74352878	74353149	499	chr18	74352943	74352957	+	0.000691	6
chr18	74352878	74353149	499	chr18	74353027	74353041	-	1.92e-07	6
chr18	74352878	74353149	499	chr18	74352960	74352974	-	6.35e-09	6
chr18	74352878	74353149	499	chr18	74353078	74353092	-	0.000159	6
chr18	74352878	74353149	499	chr18	74353040	74353054	-	0.000805	6
chr18	74352878	74353149	499	chr18	74353096	74353110	-	0.00091	6
chr2	113669077	113669416	500	chr2	113669209	113669223	-	2.34e-06	1
chr2	171936275	171936543	501	chr2	171936294	171936308	+	0.000379	2
chr2	171936275	171936543	501	chr2	171936390	171936404	-	0.000506	2
chr2	179432976	179433262	502	chr2	179433103	179433117	-	4.47e-06	1
chr7	142055958	142056235	503	chr7	142056051	142056065	+	9.64e-10	1
chr5	147172074	147172326	504	chr5	147172149	147172163	+	6.48e-06	3
chr5	147172074	147172326	504	chr5	147172119	147172133	-	0.000691	3
chr5	147172074	147172326	504	chr5	147172285	147172299	+	0.000392	3
chr17	57908503	57908804	505	chr17	57908609	57908623	+	2.65e-05	1
chr11	82410385	82410674	506	chr11	82410496	82410510	-	8.98e-08	2
chr11	82410385	82410674	506	chr11	82410476	82410490	+	0.000229	2
chr1	70772218	70772535	507	chr1	70772339	70772353	+	9.2e-06	1
chr7	35487805	35488103	508	chr7	35487945	35487959	-	1.28e-05	1
chr4	151532564	151532848	509	chr4	151532668	151532682	-	3.5e-07	1
chr1	63661125	63661548	510	chr1	63661380	63661394	-	3.25e-06	3
chr1	63661125	63661548	510	chr1	63661166	63661180	+	0.000805	3
chr1	63661125	63661548	510	chr1	63661135	63661149	-	0.000939	3
chr18	31606732	31607048	511	chr18	31606831	31606845	+	7.58e-05	1
chr6	31667590	31667861	512	.	.	.	.	.	0
chr11	59398151	59398426	513	chr11	59398298	59398312	+	0.000649	2
chr11	59398151	59398426	513	chr11	59398231	59398245	+	1.34e-07	2
chr4	124310592	124310858	514	chr4	124310719	124310733	-	0.000301	2
chr4	124310592	124310858	514	chr4	124310838	124310852	-	0.000968	2
chr3	54815686	54815982	515	chr3	54815807	54815821	-	4.39e-07	1
chr8	87535219	87535513	516	chr8	87535250	87535264	-	0.000556	2
chr8	87535219	87535513	516	chr8	87535340	87535354	-	0.000734	2
chr5	35642342	35642653	517	chr5	35642487	35642501	+	0.000367	3
chr5	35642342	35642653	517	chr5	35642347	35642361	-	0.000213	3
chr5	35642342	35642653	517	chr5	35642450	35642464	+	2.2e-07	3
chr1	37275310	37275624	518	chr1	37275406	37275420	+	9.2e-06	1
chr5	129793385	129793711	519	chr5	129793475	129793489	+	0.000301	4
chr5	129793385	129793711	519	chr5	129793395	129793409	+	1.56e-05	4
chr5	129793385	129793711	519	chr5	129793446	129793460	-	0.000178	4
chr5	129793385	129793711	519	chr5	129793541	129793555	-	2.8e-05	4
chr1	134695906	134696208	520	chr1	134696041	134696055	-	1.36e-06	4
chr1	134695906	134696208	520	chr1	134695958	134695972	+	6.92e-05	4
chr1	134695906	134696208	520	chr1	134696137	134696151	-	0.000312	4
chr1	134695906	134696208	520	chr1	134696093	134696107	-	0.000691	4
chr14	33410430	33410752	521	chr14	33410556	33410570	+	1.79e-06	1
chr19	6427240	6427520	522	chr19	6427393	6427407	+	0.000418	2
chr19	6427240	6427520	522	chr19	6427321	6427335	+	0.000669	2
chr14	50144827	50145157	523	chr14	50144881	50144895	+	0.000333	4
chr14	50144827	50145157	523	chr14	50144980	50144994	-	3.84e-05	4
chr14	50144827	50145157	523	chr14	50144916	50144930	+	0.000506	4
chr14	50144827	50145157	523	chr14	50145062	50145076	+	0.000781	4
chr2	124961549	124961871	524	chr2	124961696	124961710	-	9.83e-06	2
chr2	124961549	124961871	524	chr2	124961663	124961677	-	0.000322	2
chr3	19594515	19594854	525	chr3	19594628	19594642	+	6.01e-05	1
chr13	100670478	100670770	526	chr13	100670577	100670591	+	1.12e-06	2
chr13	100670478	100670770	526	chr13	100670618	100670632	+	0.000184	2
chr7	108567940	108568239	527	chr7	108568222	108568236	+	0.000198	3
chr7	108567940	108568239	527	chr7	108568067	108568081	-	1.12e-05	3
chr7	108567940	108568239	527	chr7	108568205	108568219	+	6.01e-05	3
chr14	65677730	65677994	528	chr14	65677851	65677865	-	6.74e-07	2
chr14	65677730	65677994	528	chr14	65677951	65677965	+	0.000131	2
chr8	24085764	24086063	529	chr8	24085899	24085913	-	9.85e-05	3
chr8	24085764	24086063	529	chr8	24086045	24086059	+	0.000116	3
chr8	24085764	24086063	529	chr8	24086018	24086032	-	0.00091	3
chr5	23613546	23613874	530	chr5	23613734	23613748	-	8.98e-08	4
chr5	23613546	23613874	530	chr5	23613676	23613690	-	1.92e-07	4
chr5	23613546	23613874	530	chr5	23613585	23613599	-	0.000291	4
chr5	23613546	23613874	530	chr5	23613713	23613727	-	0.000522	4
chr11	74398480	74398796	531	chr11	74398614	74398628	-	2.14e-06	1
chr14	35629526	35629798	532	chr14	35629634	35629648	-	3.34e-09	2
chr14	35629526	35629798	532	chr14	35629671	35629685	+	0.000198	2
chr4	41493004	41493369	533	chr4	41493137	41493151	+	1.02e-06	3
chr4	41493004	41493369	533	chr4	41493020	41493034	-	0.000574	3
chr4	41493004	41493369	533	chr4	41493185	41493199	+	0.000272	3
chr4	139914065	139914367	534	chr4	139914215	139914229	-	3e-06	3
chr4	139914065	139914367	534	chr4	139914148	139914162	-	0.000237	3
chr4	139914065	139914367	534	chr4	139914260	139914274	-	1.12e-05	3
chr13	54043490	54043753	535	chr13	54043610	54043624	-	1.36e-06	2
chr13	54043490	54043753	535	chr13	54043564	54043578	-	7.46e-06	2
chr1	91678426	91678759	536	chr1	91678625	91678639	-	3.84e-05	3
chr1	91678426	91678759	536	chr1	91678459	91678473	+	0.000379	3
chr1	91678426	91678759	536	chr1	91678607	91678621	-	0.00046	3
chr1	194281496	194281851	537	chr1	194281599	194281613	+	3.34e-09	2
chr1	194281496	194281851	537	chr1	194281611	194281625	+	0.000629	2
chr5	120874070	120874370	538	chr5	120874202	120874216	-	3.53e-06	1
chr18	25658995	25659316	539	chr18	25659139	25659153	+	7.46e-06	3
chr18	25658995	25659316	539	chr18	25659009	25659023	-	0.000312	3
chr18	25658995	25659316	539	chr18	25659125	25659139	+	3.13e-08	3
chr18	77086141	77086375	540	chr18	77086294	77086308	-	6.3e-05	1
chr17	85219983	85220303	541	chr17	85220135	85220149	-	3.46e-05	1
chr11	119251031	119251344	542	chr11	119251143	119251157	+	1.76e-05	2
chr11	119251031	119251344	542	chr11	119251091	119251105	+	0.000734	2
chr15	81910397	81910673	543	chr15	81910514	81910528	-	7.73e-08	3
chr15	81910397	81910673	543	chr15	81910463	81910477	+	0.000322	3
chr15	81910397	81910673	543	chr15	81910620	81910634	-	1.65e-05	3
chr10	7309511	7309841	544	chr10	7309615	7309629	+	6.92e-05	1
chr4	41479521	41479872	545	chr4	41479677	41479691	-	0.000171	3
chr4	41479521	41479872	545	chr4	41479654	41479668	-	0.000805	3
chr4	41479521	41479872	545	chr4	41479662	41479676	+	5.46e-05	3
chr14	20912799	20913110	546	chr14	20912909	20912923	+	8.28e-05	2
chr14	20912799	20913110	546	chr14	20913030	20913044	-	0.000649	2
chr18	64426156	64426518	547	chr18	64426277	64426291	+	2.65e-05	2
chr18	64426156	64426518	547	chr18	64426410	64426424	-	0.00091	2
chr4	153840475	153840750	548	chr4	153840589	153840603	-	1.36e-06	1
chr15	88155651	88155942	549	chr15	88155842	88155856	-	0.000153	3
chr15	88155651	88155942	549	chr15	88155748	88155762	+	3.12e-05	3
chr15	88155651	88155942	549	chr15	88155768	88155782	-	0.000263	3
chr10	127140493	127140789	550	chr10	127140571	127140585	-	0.00046	2
chr10	127140493	127140789	550	chr10	127140619	127140633	-	6.58e-08	2
chr7	149159281	149159590	551	chr7	149159431	149159445	-	3.29e-05	2
chr7	149159281	149159590	551	chr7	149159519	149159533	+	0.000712	2
chr17	49056836	49057132	552	chr17	49056928	49056942	+	4.82e-06	1
chr11	4361233	4361547	553	chr11	4361431	4361445	-	7.73e-08	2
chr11	4361233	4361547	553	chr11	4361374	4361388	-	2.6e-08	2
chr2	172146485	172146771	554	chr2	172146647	172146661	+	0.000432	2
chr2	172146485	172146771	554	chr2	172146569	172146583	+	5.6e-06	2
chr11	117734276	117734561	555	chr11	117734403	117734417	+	0.00091	3
chr11	117734276	117734561	555	chr11	117734324	117734338	+	7.93e-05	3
chr11	117734276	117734561	555	chr11	117734422	117734436	-	3.65e-05	3
chr7	87522644	87522947	556	chr7	87522760	87522774	+	7.96e-09	3
chr7	87522644	87522947	556	chr7	87522703	87522717	-	0.000103	3
chr7	87522644	87522947	556	chr7	87522873	87522887	+	0.000522	3
chr12	88381293	88381564	557	chr12	88381420	88381434	-	3.65e-05	1
chr4	42957691	42958309	558	chr4	42958134	42958148	+	9.2e-06	1
chr15	99527814	99528145	559	chr15	99528006	99528020	-	0.000229	3
chr15	99527814	99528145	559	chr15	99527939	99527953	+	6.58e-08	3
chr15	99527814	99528145	559	chr15	99527829	99527843	-	0.000691	3
chr8	9769115	9769440	560	chr8	9769182	9769196	+	0.000446	3
chr8	9769115	9769440	560	chr8	9769153	9769167	-	0.000649	3
chr8	9769115	9769440	560	chr8	9769267	9769281	-	3.12e-05	3
chr7	17061971	17062280	561	chr7	17062128	17062142	-	6.6e-05	2
chr7	17061971	17062280	561	chr7	17062189	17062203	-	9.83e-06	2
chr5	117164364	117164650	562	chr5	117164452	117164466	+	8.57e-06	3
chr5	117164364	117164650	562	chr5	117164621	117164635	+	0.000432	3
chr5	117164364	117164650	562	chr5	117164518	117164532	-	0.00061	3
chr12	107871406	107871684	563	chr12	107871579	107871593	+	0.000649	2
chr12	107871406	107871684	563	chr12	107871505	107871519	-	0.000649	2
chr9	113562809	113563069	564	chr9	113562951	113562965	+	0.000968	2
chr9	113562809	113563069	564	chr9	113562904	113562918	-	6.58e-08	2
chr14	30470278	30470594	565	chr14	30470403	30470417	-	0.000301	4
chr14	30470278	30470594	565	chr14	30470349	30470363	-	0.000367	4
chr14	30470278	30470594	565	chr14	30470388	30470402	+	1.56e-05	4
chr14	30470278	30470594	565	chr14	30470414	30470428	+	6.3e-05	4
chr19	42499809	42500119	566	chr19	42499918	42499932	+	0.000805	3
chr19	42499809	42500119	566	chr19	42499900	42499914	+	3.25e-06	3
chr19	42499809	42500119	566	chr19	42499970	42499984	-	0.000883	3
chr13	78310538	78310839	567	chr13	78310651	78310665	-	7.73e-08	1
chr14	35680519	35680803	568	chr14	35680625	35680639	-	0.000333	2
chr14	35680519	35680803	568	chr14	35680637	35680651	-	9.2e-06	2
chr2	26060713	26060989	569	chr2	26060723	26060737	+	0.000805	2
chr2	26060713	26060989	569	chr2	26060827	26060841	-	1.56e-05	2
chr11	101519698	101520144	570	chr11	101520089	101520103	+	0.000147	1
chr7	29290641	29290960	571	chr7	29290807	29290821	-	0.000781	1
chr5	92787111	92787474	572	chr5	92787239	92787253	-	0.000237	7
chr5	92787111	92787474	572	chr5	92787225	92787239	-	2.47e-07	7
chr5	92787111	92787474	572	chr5	92787158	92787172	-	6.08e-07	7
chr5	92787111	92787474	572	chr5	92787355	92787369	-	2.2e-07	7
chr5	92787111	92787474	572	chr5	92787280	92787294	-	3.53e-06	7
chr5	92787111	92787474	572	chr5	92787316	92787330	-	0.000883	7
chr5	92787111	92787474	572	chr5	92787378	92787392	+	0.000131	7
chr2	181499397	181499903	573	chr2	181499456	181499470	-	0.000669	3
chr2	181499397	181499903	573	chr2	181499504	181499518	+	6.74e-07	3
chr2	181499397	181499903	573	chr2	181499737	181499751	+	0.000556	3
chr7	86644169	86644449	574	chr7	86644231	86644245	-	0.000831	2
chr7	86644169	86644449	574	chr7	86644297	86644311	-	4.47e-06	2
chr5	136716302	136716603	575	chr5	136716341	136716355	-	0.000178	3
chr5	136716302	136716603	575	chr5	136716439	136716453	+	0.000998	3
chr5	136716302	136716603	575	chr5	136716434	136716448	-	9.64e-10	3
chr2	92911915	92912219	576	chr2	92912171	92912185	-	0.000213	4
chr2	92911915	92912219	576	chr2	92911917	92911931	-	0.000968	4
chr2	92911915	92912219	576	chr2	92911996	92912010	+	6.01e-06	4
chr2	92911915	92912219	576	chr2	92912178	92912192	+	0.000856	4
chr9	62998968	62999254	577	chr9	62999089	62999103	-	1.96e-06	2
chr9	62998968	62999254	577	chr9	62999045	62999059	-	0.00046	2
chr9	107389266	107389555	578	chr9	107389376	107389390	+	7.24e-05	2
chr9	107389266	107389555	578	chr9	107389512	107389526	+	0.000831	2
chr7	6409167	6409456	579	chr7	6409293	6409307	-	1.05e-05	1
chr15	80108136	80108418	580	chr15	80108284	80108298	-	0.00046	2
chr15	80108136	80108418	580	chr15	80108255	80108269	-	3.12e-05	2
chr7	36000376	36000654	581	chr7	36000596	36000610	+	0.000291	2
chr7	36000376	36000654	581	chr7	36000466	36000480	-	7.96e-09	2
chr13	13877339	13877755	582	chr13	13877405	13877419	-	0.000506	3
chr13	13877339	13877755	582	chr13	13877390	13877404	+	0.000939	3
chr13	13877339	13877755	582	chr13	13877477	13877491	+	0.000221	3
chr7	25735393	25735708	583	chr7	25735636	25735650	-	4.05e-05	5
chr7	25735393	25735708	583	chr7	25735544	25735558	-	0.000669	5
chr7	25735393	25735708	583	chr7	25735515	25735529	+	0.000282	5
chr7	25735393	25735708	583	chr7	25735400	25735414	-	0.000392	5
chr7	25735393	25735708	583	chr7	25735644	25735658	-	0.000649	5
chr5	37401038	37401513	584	chr5	37401159	37401173	-	0.000206	5
chr5	37401038	37401513	584	chr5	37401111	37401125	+	0.000206	5
chr5	37401038	37401513	584	chr5	37401404	37401418	-	0.000475	5
chr5	37401038	37401513	584	chr5	37401239	37401253	-	0.000475	5
chr5	37401038	37401513	584	chr5	37401322	37401336	-	0.000475	5
chr8	58419430	58419768	585	chr8	58419556	58419570	+	0.000418	1
chr11	87799905	87800202	586	chr11	87800010	87800024	+	0.000649	2
chr11	87799905	87800202	586	chr11	87800183	87800197	+	0.000282	2
chr9	10569902	10570185	587	chr9	10570106	10570120	+	0.000312	2
chr9	10569902	10570185	587	chr9	10570038	10570052	-	8.02e-06	2
chr14	75766627	75766927	588	chr14	75766775	75766789	-	7.47e-07	2
chr14	75766627	75766927	588	chr14	75766867	75766881	+	0.000968	2
chr4	147660870	147661199	589	chr4	147660978	147660992	+	2.65e-05	1
chr7	26367405	26367821	590	chr7	26367567	26367581	+	0.00046	9
chr7	26367405	26367821	590	chr7	26367525	26367539	+	1.73e-07	9
chr7	26367405	26367821	590	chr7	26367459	26367473	+	2.2e-07	9
chr7	26367405	26367821	590	chr7	26367581	26367595	+	1.2e-05	9
chr7	26367405	26367821	590	chr7	26367655	26367669	+	0.000367	9
chr7	26367405	26367821	590	chr7	26367636	26367650	+	1.49e-06	9
chr7	26367405	26367821	590	chr7	26367701	26367715	+	2.6e-08	9
chr7	26367405	26367821	590	chr7	26367676	26367690	+	0.000263	9
chr7	26367405	26367821	590	chr7	26367720	26367734	+	3.46e-05	9
chr1	75259653	75259955	591	chr1	75259729	75259743	+	2.2e-07	1
chr1	161454224	161454581	592	chr1	161454399	161454413	-	0.000254	2
chr1	161454224	161454581	592	chr1	161454314	161454328	+	0.000405	2
chr16	43753910	43754224	593	chr16	43754129	43754143	-	0.000237	1
chr6	32660222	32660512	594	chr6	32660362	32660376	-	3.84e-05	1
chr5	128829292	128829529	595	chr5	128829409	128829423	-	9.83e-06	1
chr2	165065067	165065357	596	chr2	165065195	165065209	-	4.47e-06	1
chr9	121700414	121700727	597	chr9	121700513	121700527	+	1.12e-06	1
chr11	71750641	71750975	598	chr11	71750871	71750885	+	0.000322	2
chr11	71750641	71750975	598	chr11	71750798	71750812	-	1.46e-05	2
chr10	126491743	126492062	599	chr10	126491897	126491911	-	9.2e-06	2
chr10	126491743	126492062	599	chr10	126491885	126491899	-	0.00091	2
chr5	129423181	129423504	600	chr5	129423309	129423323	+	8.98e-08	1
chr18	81357700	81358009	601	chr18	81357825	81357839	-	2.37e-05	3
chr18	81357700	81358009	601	chr18	81357715	81357729	-	0.000237	3
chr18	81357700	81358009	601	chr18	81357868	81357882	-	0.000159	3
chr4	139882732	139883014	602	chr4	139882810	139882824	+	0.000712	1
chr12	113749326	113749631	603	chr12	113749465	113749479	-	1.98e-05	2
chr12	113749326	113749631	603	chr12	113749493	113749507	-	0.000629	2
chr2	127410429	127410700	604	chr2	127410546	127410560	+	0.000691	1
chr17	91492101	91492429	605	chr17	91492192	91492206	+	1.79e-06	3
chr17	91492101	91492429	605	chr17	91492241	91492255	-	9.83e-06	3
chr17	91492101	91492429	605	chr17	91492224	91492238	+	0.000272	3
chr11	71926872	71927182	606	chr11	71926990	71927004	+	4.35e-10	1
chr11	80929261	80929530	607	chr11	80929271	80929285	+	0.000506	4
chr11	80929261	80929530	607	chr11	80929510	80929524	+	0.000691	4
chr11	80929261	80929530	607	chr11	80929362	80929376	+	1.05e-05	4
chr11	80929261	80929530	607	chr11	80929503	80929517	-	0.000356	4
chr11	79407069	79407369	608	chr11	79407211	79407225	-	0.000405	3
chr11	79407069	79407369	608	chr11	79407157	79407171	+	6.74e-07	3
chr11	79407069	79407369	608	chr11	79407225	79407239	+	8.28e-05	3
chr9	88414661	88415781	609	chr9	88415158	88415172	+	0.000263	7
chr9	88414661	88415781	609	chr9	88415134	88415148	+	8.28e-05	7
chr9	88414661	88415781	609	chr9	88414689	88414703	+	0.000805	7
chr9	88414661	88415781	609	chr9	88414739	88414753	+	9.85e-05	7
chr9	88414661	88415781	609	chr9	88414722	88414736	-	0.000191	7
chr9	88414661	88415781	609	chr9	88415178	88415192	-	2.8e-05	7
chr9	88414661	88415781	609	chr9	88415320	88415334	-	0.000333	7
chr13	97960405	97960735	610	chr13	97960529	97960543	+	0.000246	2
chr13	97960405	97960735	610	chr13	97960446	97960460	+	0.000291	2
chr5	62874820	62875150	611	chr5	62874964	62874978	-	3.12e-05	1
chr5	147039124	147039451	612	chr5	147039261	147039275	+	4.13e-06	8
chr5	147039124	147039451	612	chr5	147039206	147039220	+	1.19e-07	8
chr5	147039124	147039451	612	chr5	147039194	147039208	+	0.000734	8
chr5	147039124	147039451	612	chr5	147039247	147039261	+	0.000405	8
chr5	147039124	147039451	612	chr5	147039398	147039412	+	1.65e-05	8
chr5	147039124	147039451	612	chr5	147039384	147039398	+	9.2e-06	8
chr5	147039124	147039451	612	chr5	147039314	147039328	+	1.29e-08	8
chr5	147039124	147039451	612	chr5	147039336	147039350	+	0.00061	8
chr14	80656974	80657297	613	chr14	80657168	80657182	-	0.000312	6
chr14	80656974	80657297	613	chr14	80657079	80657093	+	1.46e-05	6
chr14	80656974	80657297	613	chr14	80657050	80657064	-	0.000883	6
chr14	80656974	80657297	613	chr14	80657075	80657089	-	0.000856	6
chr14	80656974	80657297	613	chr14	80657145	80657159	+	0.000432	6
chr14	80656974	80657297	613	chr14	80657228	80657242	-	6.6e-05	6
chr6	114137167	114137472	614	chr6	114137310	114137324	-	1.87e-05	1
chr12	82307254	82307483	615	chr12	82307357	82307371	+	3e-06	1
chr11	57247747	57248020	616	chr11	57247988	57248002	+	0.000301	5
chr11	57247747	57248020	616	chr11	57247779	57247793	+	0.000574	5
chr11	57247747	57248020	616	chr11	57247836	57247850	+	1.12e-05	5
chr11	57247747	57248020	616	chr11	57247819	57247833	-	0.000392	5
chr11	57247747	57248020	616	chr11	57247925	57247939	-	7.93e-05	5
chr15	88004814	88005093	617	chr15	88004945	88004959	-	4.35e-08	2
chr15	88004814	88005093	617	chr15	88004851	88004865	+	0.000734	2
chr7	68119091	68119446	618	chr7	68119201	68119215	+	0.000165	6
chr7	68119091	68119446	618	chr7	68119172	68119186	+	0.000367	6
chr7	68119091	68119446	618	chr7	68119288	68119302	+	2.23e-05	6
chr7	68119091	68119446	618	chr7	68119259	68119273	+	2.8e-05	6
chr7	68119091	68119446	618	chr7	68119230	68119244	+	6.3e-05	6
chr7	68119091	68119446	618	chr7	68119419	68119433	+	0.000831	6
chr3	91017293	91017578	619	chr3	91017422	91017436	+	6.3e-05	5
chr3	91017293	91017578	619	chr3	91017393	91017407	+	0.000107	5
chr3	91017293	91017578	619	chr3	91017364	91017378	+	0.000221	5
chr3	91017293	91017578	619	chr3	91017477	91017491	+	1.12e-06	5
chr3	91017293	91017578	619	chr3	91017455	91017469	+	2.5e-05	5
chr12	32244425	32244715	620	chr12	32244645	32244659	-	0.000322	3
chr12	32244425	32244715	620	chr12	32244510	32244524	+	9.83e-06	3
chr12	32244425	32244715	620	chr12	32244437	32244451	+	0.000883	3
chr15	67959284	67959607	621	chr15	67959419	67959433	-	1.19e-07	1
chr8	86864671	86864953	622	chr8	86864894	86864908	-	0.000147	2
chr8	86864671	86864953	622	chr8	86864803	86864817	-	3.92e-07	2
chr8	128906185	128906509	623	chr8	128906209	128906223	-	7.24e-05	1
chr17	45624263	45624612	624	chr17	45624443	45624457	-	9.64e-10	2
chr17	45624263	45624612	624	chr17	45624295	45624309	+	4.95e-05	2
chr9	53514117	53514436	625	chr9	53514261	53514275	+	3.65e-05	1
chr10	74804751	74805055	626	chr10	74804774	74804788	-	0.000184	2
chr10	74804751	74805055	626	chr10	74804886	74804900	-	7.46e-06	2
chr16	36887670	36887985	627	chr16	36887922	36887936	-	0.000367	2
chr16	36887670	36887985	627	chr16	36887779	36887793	+	1.96e-06	2
chr8	90757431	90757687	628	chr8	90757559	90757573	-	0.000805	1
chr5	128041560	128041812	629	chr5	128041648	128041662	+	2.23e-05	2
chr5	128041560	128041812	629	chr5	128041716	128041730	+	0.000939	2
chr18	85374689	85374967	630	chr18	85374780	85374794	+	2.11e-05	1
chr9	64472409	64472674	631	chr9	64472542	64472556	-	2.11e-05	1
chr4	128591135	128591423	632	chr4	128591253	128591267	+	0.000405	2
chr4	128591135	128591423	632	chr4	128591347	128591361	-	0.000171	2
chr2	164805340	164805630	633	chr2	164805449	164805463	-	9.2e-06	4
chr2	164805340	164805630	633	chr2	164805434	164805448	+	2.37e-05	4
chr2	164805340	164805630	633	chr2	164805376	164805390	-	0.000539	4
chr2	164805340	164805630	633	chr2	164805586	164805600	+	0.000229	4
chr5	129385085	129385369	634	chr5	129385196	129385210	+	1.12e-05	4
chr5	129385085	129385369	634	chr5	129385093	129385107	+	0.000191	4
chr5	129385085	129385369	634	chr5	129385236	129385250	+	0.000856	4
chr5	129385085	129385369	634	chr5	129385208	129385222	+	0.000475	4
chr18	42555818	42556110	635	chr18	42555901	42555915	-	0.000856	4
chr18	42555818	42556110	635	chr18	42555830	42555844	+	0.00049	4
chr18	42555818	42556110	635	chr18	42555825	42555839	-	0.000506	4
chr18	42555818	42556110	635	chr18	42555923	42555937	+	4.71e-05	4
chr4	131213927	131214199	636	chr4	131214016	131214030	-	1.92e-07	1
chr4	138615597	138615882	637	chr4	138615712	138615726	-	0.000968	3
chr4	138615597	138615882	637	chr4	138615724	138615738	-	1.37e-05	3
chr4	138615597	138615882	637	chr4	138615743	138615757	-	0.000322	3
chr15	74489467	74489750	638	chr15	74489580	74489594	-	0.000165	2
chr15	74489467	74489750	638	chr15	74489509	74489523	-	1.2e-05	2
chr16	95194196	95194488	639	chr16	95194273	95194287	+	0.000367	3
chr16	95194196	95194488	639	chr16	95194353	95194367	+	0.000592	3
chr16	95194196	95194488	639	chr16	95194446	95194460	+	0.000734	3
chr6	89020045	89020333	640	chr6	89020151	89020165	-	0.000184	3
chr6	89020045	89020333	640	chr6	89020137	89020151	-	8.66e-05	3
chr6	89020045	89020333	640	chr6	89020163	89020177	-	5.6e-06	3
chr1	75273861	75274168	641	chr1	75273950	75273964	+	5.6e-06	1
chr6	39199433	39199711	642	chr6	39199557	39199571	-	0.000107	1
chr12	108294843	108295109	643	chr12	108294959	108294973	+	2.77e-06	2
chr12	108294843	108295109	643	chr12	108294853	108294867	+	0.000592	2
chr15	101303432	101303725	644	chr15	101303701	101303715	+	0.000998	2
chr15	101303432	101303725	644	chr15	101303553	101303567	-	0.000159	2
chr7	17457044	17457362	645	chr7	17457152	17457166	+	0.000291	2
chr7	17457044	17457362	645	chr7	17457184	17457198	+	0.000939	2
chr5	124598422	124598690	646	chr5	124598569	124598583	-	8.66e-05	3
chr5	124598422	124598690	646	chr5	124598494	124598508	+	1.2e-05	3
chr5	124598422	124598690	646	chr5	124598450	124598464	-	0.000405	3
chr14	13334539	13334854	647	chr14	13334656	13334670	-	9.21e-07	3
chr14	13334539	13334854	647	chr14	13334574	13334588	+	0.000556	3
chr14	13334539	13334854	647	chr14	13334720	13334734	-	6.6e-05	3
chr6	95173558	95173874	648	chr6	95173683	95173697	-	1.28e-05	1
chr6	114037162	114037449	649	chr6	114037294	114037308	-	4.47e-06	2
chr6	114037162	114037449	649	chr6	114037276	114037290	-	0.000574	2
chr9	43742810	43743103	650	chr9	43742936	43742950	-	2.6e-08	2
chr9	43742810	43743103	650	chr9	43742889	43742903	-	0.000446	2
chr15	80033878	80034172	651	chr15	80034001	80034015	-	3.65e-05	4
chr15	80033878	80034172	651	chr15	80034104	80034118	+	0.000734	4
chr15	80033878	80034172	651	chr15	80034055	80034069	+	0.000831	4
chr15	80033878	80034172	651	chr15	80034107	80034121	-	0.000781	4
chr7	114345392	114345668	652	chr7	114345528	114345542	-	4.13e-06	1
chr6	119183153	119183436	653	chr6	119183256	119183270	-	6.48e-06	3
chr6	119183153	119183436	653	chr6	119183353	119183367	-	0.000522	3
chr6	119183153	119183436	653	chr6	119183371	119183385	-	0.000939	3
chr9	27115708	27115999	654	chr9	27115849	27115863	-	0.000805	3
chr9	27115708	27115999	654	chr9	27115829	27115843	+	9.2e-06	3
chr9	27115708	27115999	654	chr9	27115841	27115855	+	0.000805	3
chr10	79180800	79181042	655	chr10	79180912	79180926	-	5.6e-06	1
chr7	108570703	108570972	656	chr7	108570772	108570786	+	0.000592	2
chr7	108570703	108570972	656	chr7	108570907	108570921	-	0.000831	2
chr19	42711198	42711477	657	chr19	42711418	42711432	-	6.3e-05	3
chr19	42711198	42711477	657	chr19	42711310	42711324	-	4.39e-07	3
chr19	42711198	42711477	657	chr19	42711238	42711252	-	0.000805	3
chr12	82877231	82877515	658	chr12	82877339	82877353	-	4.82e-06	3
chr12	82877231	82877515	658	chr12	82877359	82877373	+	5.47e-07	3
chr12	82877231	82877515	658	chr12	82877487	82877501	-	0.000856	3
chr7	31219357	31219602	659	chr7	31219439	31219453	-	6.92e-05	1
chr18	38115754	38116018	660	chr18	38115893	38115907	-	8.02e-06	2
chr18	38115754	38116018	660	chr18	38115833	38115847	-	0.00091	2
chr17	25376550	25376836	661	chr17	25376688	25376702	-	0.000831	1
chr10	40681236	40681507	662	chr10	40681349	40681363	+	8.02e-06	2
chr10	40681236	40681507	662	chr10	40681261	40681275	-	0.000131	2
chr8	90055153	90055402	663	chr8	90055257	90055271	-	9.2e-06	2
chr8	90055153	90055402	663	chr8	90055349	90055363	-	0.000649	2
chr11	81007467	81007719	664	chr11	81007666	81007680	+	0.000649	3
chr11	81007467	81007719	664	chr11	81007553	81007567	+	0.000344	3
chr11	81007467	81007719	664	chr11	81007689	81007703	+	0.000883	3
chr10	10801329	10801616	665	chr10	10801455	10801469	-	3.5e-07	1
chr10	110113667	110113957	666	chr10	110113748	110113762	+	1.28e-05	1
chr13	55520595	55520854	667	chr13	55520708	55520722	-	7.96e-09	2
chr13	55520595	55520854	667	chr13	55520697	55520711	-	1.09e-08	2
chr7	133969048	133969342	668	chr7	133969152	133969166	+	0.000107	1
chr6	127717887	127718160	669	chr6	127717991	127718005	+	2.14e-06	2
chr6	127717887	127718160	669	chr6	127718043	127718057	+	0.000159	2
chr1	169117985	169118298	670	chr1	169118127	169118141	-	2.37e-05	1
chr2	33920675	33920964	671	chr2	33920793	33920807	+	1.92e-07	4
chr2	33920675	33920964	671	chr2	33920859	33920873	+	0.000883	4
chr2	33920675	33920964	671	chr2	33920805	33920819	+	0.000446	4
chr2	33920675	33920964	671	chr2	33920897	33920911	-	2.95e-05	4
chr17	35201069	35201377	672	chr17	35201189	35201203	+	9.2e-06	2
chr17	35201069	35201377	672	chr17	35201099	35201113	-	0.000475	2
chr11	72307576	72307873	673	chr11	72307758	72307772	+	0.000432	3
chr11	72307576	72307873	673	chr11	72307713	72307727	-	0.000178	3
chr11	72307576	72307873	673	chr11	72307785	72307799	-	0.000831	3
chr11	78146265	78146533	674	chr11	78146372	78146386	+	0.000805	5
chr11	78146265	78146533	674	chr11	78146294	78146308	+	0.000237	5
chr11	78146265	78146533	674	chr11	78146359	78146373	-	0.000805	5
chr11	78146265	78146533	674	chr11	78146515	78146529	+	3.53e-06	5
chr11	78146265	78146533	674	chr11	78146487	78146501	-	0.000539	5
chr12	87530675	87530961	675	chr12	87530766	87530780	+	1.05e-05	2
chr12	87530675	87530961	675	chr12	87530910	87530924	-	0.000344	2
chr12	103788795	103789087	676	chr12	103788911	103788925	-	3.12e-05	1
chr11	118546840	118547112	677	chr11	118546934	118546948	+	2.77e-06	3
chr11	118546840	118547112	677	chr11	118547024	118547038	-	0.000291	3
chr11	118546840	118547112	677	chr11	118546994	118547008	-	0.000734	3
chr4	118394418	118394693	678	chr4	118394545	118394559	-	3e-06	2
chr4	118394418	118394693	678	chr4	118394440	118394454	-	0.000592	2
chr4	147667447	147667720	679	chr4	147667594	147667608	-	9.44e-05	2
chr4	147667447	147667720	679	chr4	147667558	147667572	-	0.000522	2
chr15	26239464	26239788	680	chr15	26239650	26239664	+	0.00091	2
chr15	26239464	26239788	680	chr15	26239621	26239635	-	2.65e-05	2
chr1	91925037	91925306	681	chr1	91925103	91925117	+	4.47e-06	7
chr1	91925037	91925306	681	chr1	91925115	91925129	+	4.47e-06	7
chr1	91925037	91925306	681	chr1	91925241	91925255	+	9.44e-05	7
chr1	91925037	91925306	681	chr1	91925139	91925153	+	0.000475	7
chr1	91925037	91925306	681	chr1	91925127	91925141	+	4.47e-06	7
chr1	91925037	91925306	681	chr1	91925234	91925248	-	0.000405	7
chr1	91925037	91925306	681	chr1	91925151	91925165	+	0.000475	7
chr14	67528633	67528930	682	chr14	67528725	67528739	+	0.000506	1
chr15	75419455	75419705	683	chr15	75419592	75419606	-	0.000649	1
chr9	35112700	35113243	684	chr9	35113147	35113161	+	0.000883	1
chr10	90847094	90847388	685	chr10	90847107	90847121	+	0.000712	3
chr10	90847094	90847388	685	chr10	90847209	90847223	+	2.47e-07	3
chr10	90847094	90847388	685	chr10	90847146	90847160	+	0.000272	3
chr5	28168132	28168458	686	chr5	28168174	28168188	-	0.000968	4
chr5	28168132	28168458	686	chr5	28168342	28168356	-	0.000121	4
chr5	28168132	28168458	686	chr5	28168233	28168247	-	0.000367	4
chr5	28168132	28168458	686	chr5	28168276	28168290	-	2.78e-07	4
chr12	30215346	30215644	687	chr12	30215381	30215395	+	0.000629	5
chr12	30215346	30215644	687	chr12	30215374	30215388	-	0.000998	5
chr12	30215346	30215644	687	chr12	30215490	30215504	+	3e-06	5
chr12	30215346	30215644	687	chr12	30215397	30215411	+	0.000136	5
chr12	30215346	30215644	687	chr12	30215441	30215455	-	0.000805	5
chr8	16700519	16700804	688	chr8	16700669	16700683	-	0.000691	2
chr8	16700519	16700804	688	chr8	16700636	16700650	-	0.000556	2
chr1	138574910	138575181	689	chr1	138575006	138575020	+	7.46e-06	1
chr1	161632270	161632532	690	chr1	161632357	161632371	+	1.24e-06	3
chr1	161632270	161632532	690	chr1	161632303	161632317	-	0.000367	3
chr1	161632270	161632532	690	chr1	161632468	161632482	-	0.000405	3
chr7	34328515	34328855	691	chr7	34328714	34328728	-	6.74e-07	7
chr7	34328515	34328855	691	chr7	34328598	34328612	-	6.3e-05	7
chr7	34328515	34328855	691	chr7	34328543	34328557	-	2.34e-06	7
chr7	34328515	34328855	691	chr7	34328565	34328579	-	2.95e-05	7
chr7	34328515	34328855	691	chr7	34328656	34328670	-	9.44e-05	7
chr7	34328515	34328855	691	chr7	34328627	34328641	-	0.000237	7
chr7	34328515	34328855	691	chr7	34328812	34328826	+	0.000712	7
chr5	106803116	106803371	692	chr5	106803219	106803233	+	0.000522	1
chr1	168894677	168894969	693	chr1	168894789	168894803	-	6.6e-05	1
chr5	115643366	115643652	694	chr5	115643481	115643495	-	6.01e-06	1
chr6	88927094	88927350	695	chr6	88927110	88927124	+	0.000522	3
chr6	88927094	88927350	695	chr6	88927189	88927203	+	1.2e-05	3
chr6	88927094	88927350	695	chr6	88927283	88927297	+	0.000831	3
chr6	128419537	128419842	696	chr6	128419636	128419650	-	0.000191	4
chr6	128419537	128419842	696	chr6	128419621	128419635	+	1.98e-05	4
chr6	128419537	128419842	696	chr6	128419800	128419814	+	0.000968	4
chr6	128419537	128419842	696	chr6	128419671	128419685	+	0.000159	4
chr17	27603674	27603940	697	chr17	27603771	27603785	+	0.000126	1
chr9	20679507	20679816	698	chr9	20679595	20679609	+	0.000301	5
chr9	20679507	20679816	698	chr9	20679559	20679573	+	0.000998	5
chr9	20679507	20679816	698	chr9	20679690	20679704	+	0.000592	5
chr9	20679507	20679816	698	chr9	20679619	20679633	+	8.66e-05	5
chr9	20679507	20679816	698	chr9	20679625	20679639	+	0.00046	5
chr4	44717266	44717542	699	chr4	44717406	44717420	+	0.000998	2
chr4	44717266	44717542	699	chr4	44717355	44717369	-	5.2e-06	2
chr13	73040113	73040375	700	chr13	73040197	73040211	+	1.36e-06	3
chr13	73040113	73040375	700	chr13	73040237	73040251	+	0.000103	3
chr13	73040113	73040375	700	chr13	73040307	73040321	-	0.00091	3
chr7	28438844	28439150	701	chr7	28439109	28439123	-	0.000165	2
chr7	28438844	28439150	701	chr7	28438956	28438970	+	0.000367	2
chr7	29947701	29947963	702	chr7	29947816	29947830	+	2.2e-07	1
chr2	121184083	121184346	703	chr2	121184169	121184183	+	9.83e-06	1
chr11	32618543	32618816	704	chr11	32618636	32618650	+	3.53e-06	3
chr11	32618543	32618816	704	chr11	32618628	32618642	-	9.85e-05	3
chr11	32618543	32618816	704	chr11	32618648	32618662	+	1.96e-06	3
chr3	141474397	141474727	705	chr3	141474547	141474561	-	5.46e-05	1
chr15	86763177	86763453	706	chr15	86763285	86763299	+	0.000506	2
chr15	86763177	86763453	706	chr15	86763300	86763314	-	0.000126	2
chr9	64515409	64515725	707	chr9	64515513	64515527	+	4.82e-06	2
chr9	64515409	64515725	707	chr9	64515561	64515575	-	0.000246	2
chr11	114952918	114953211	708	chr11	114953035	114953049	+	0.000649	2
chr11	114952918	114953211	708	chr11	114953025	114953039	+	5.65e-08	2
chr11	119401422	119401705	709	chr11	119401531	119401545	-	1.12e-05	2
chr11	119401422	119401705	709	chr11	119401447	119401461	-	0.000246	2
chr8	17115760	17116027	710	chr8	17115849	17115863	+	3e-06	1
chr15	92726332	92726635	711	chr15	92726587	92726601	-	0.000968	3
chr15	92726332	92726635	711	chr15	92726457	92726471	-	7.96e-09	3
chr15	92726332	92726635	711	chr15	92726571	92726585	-	0.000669	3
chr1	169009701	169009982	712	chr1	169009805	169009819	+	2.8e-05	2
chr1	169009701	169009982	712	chr1	169009871	169009885	+	0.000282	2
chr7	53652107	53652383	713	chr7	53652202	53652216	+	5.2e-06	2
chr7	53652107	53652383	713	chr7	53652308	53652322	-	0.000221	2
chrX	7215744	7216028	714	chrX	7215870	7215884	-	1.12e-06	1
chr13	55677356	55677664	715	chr13	55677608	55677622	-	1.79e-06	5
chr13	55677356	55677664	715	chr13	55677362	55677376	+	0.000379	5
chr13	55677356	55677664	715	chr13	55677501	55677515	-	6.58e-08	5
chr13	55677356	55677664	715	chr13	55677450	55677464	-	3.53e-06	5
chr13	55677356	55677664	715	chr13	55677640	55677654	+	6.92e-05	5
chr5	29281637	29281947	716	chr5	29281803	29281817	+	0.000539	3
chr5	29281637	29281947	716	chr5	29281763	29281777	-	9.21e-07	3
chr5	29281637	29281947	716	chr5	29281720	29281734	+	0.000734	3
chr4	125673889	125674186	717	chr4	125674020	125674034	-	7.46e-06	2
chr4	125673889	125674186	717	chr4	125673985	125673999	+	0.000734	2
chr2	146052315	146052631	718	chr2	146052461	146052475	-	4.05e-05	3
chr2	146052315	146052631	718	chr2	146052594	146052608	-	7.24e-05	3
chr2	146052315	146052631	718	chr2	146052530	146052544	-	0.000856	3
chr15	100703601	100703906	719	chr15	100703730	100703744	-	4.39e-07	1
chr16	34400493	34400760	720	chr16	34400647	34400661	+	1.24e-06	2
chr16	34400493	34400760	720	chr16	34400600	34400614	+	1.46e-05	2
chr7	19868375	19868693	721	chr7	19868501	19868515	+	1.36e-06	4
chr7	19868375	19868693	721	chr7	19868604	19868618	+	0.000574	4
chr7	19868375	19868693	721	chr7	19868519	19868533	+	0.000574	4
chr7	19868375	19868693	721	chr7	19868647	19868661	+	0.000344	4
chr7	64847612	64847931	722	chr7	64847722	64847736	+	1.49e-06	3
chr7	64847612	64847931	722	chr7	64847623	64847637	-	0.000392	3
chr7	64847612	64847931	722	chr7	64847849	64847863	-	0.000831	3
chr5	121518800	121519074	723	chr5	121518821	121518835	-	2.34e-06	3
chr5	121518800	121519074	723	chr5	121518899	121518913	-	3.84e-05	3
chr5	121518800	121519074	723	chr5	121518850	121518864	+	0.000165	3
chr6	8898538	8898825	724	chr6	8898694	8898708	+	7.24e-05	2
chr6	8898538	8898825	724	chr6	8898656	8898670	-	5.2e-06	2
chr11	69727984	69728291	725	chr11	69728125	69728139	-	4.47e-06	1
chr1	74903805	74904051	726	chr1	74903869	74903883	-	0.000856	3
chr1	74903805	74904051	726	chr1	74903826	74903840	+	0.00091	3
chr1	74903805	74904051	726	chr1	74903902	74903916	+	0.000781	3
chr18	16965280	16965592	727	chr18	16965520	16965534	+	0.000178	3
chr18	16965280	16965592	727	chr18	16965425	16965439	-	4.26e-05	3
chr18	16965280	16965592	727	chr18	16965571	16965585	-	6.3e-05	3
chr4	15808306	15808624	728	chr4	15808445	15808459	-	6.01e-06	1
chr15	83939412	83939707	729	chr15	83939507	83939521	-	0.000539	3
chr15	83939412	83939707	729	chr15	83939528	83939542	+	2.14e-06	3
chr15	83939412	83939707	729	chr15	83939513	83939527	-	0.000757	3
chr5	104225109	104225401	730	chr5	104225242	104225256	-	7.73e-08	1
chr14	33280837	33281131	731	chr14	33280967	33280981	+	2.8e-05	3
chr14	33280837	33281131	731	chr14	33280931	33280945	-	0.000669	3
chr14	33280837	33281131	731	chr14	33281077	33281091	+	0.000757	3
chr6	31835294	31835609	732	chr6	31835307	31835321	+	0.00049	1
chr2	179839202	179839492	733	chr2	179839286	179839300	-	2.37e-05	1
chr11	32789365	32789636	734	chr11	32789491	32789505	-	8.29e-07	3
chr11	32789365	32789636	734	chr11	32789432	32789446	-	0.000246	3
chr11	32789365	32789636	734	chr11	32789380	32789394	-	0.000883	3
chr16	23890306	23890621	735	chr16	23890452	23890466	-	0.000116	3
chr16	23890306	23890621	735	chr16	23890425	23890439	-	0.000781	3
chr16	23890306	23890621	735	chr16	23890369	23890383	-	0.000939	3
chr1	156570696	156571021	736	chr1	156570816	156570830	+	9.2e-06	2
chr1	156570696	156571021	736	chr1	156570869	156570883	-	0.000392	2
chr9	64514415	64514704	737	chr9	64514522	64514536	-	0.000282	5
chr9	64514415	64514704	737	chr9	64514542	64514556	-	3.11e-07	5
chr9	64514415	64514704	737	chr9	64514645	64514659	+	0.000237	5
chr9	64514415	64514704	737	chr9	64514569	64514583	+	0.000592	5
chr9	64514415	64514704	737	chr9	64514672	64514686	-	0.000254	5
chr15	83916821	83917172	738	chr15	83916957	83916971	-	5.6e-06	3
chr15	83916821	83917172	738	chr15	83916824	83916838	-	0.000291	3
chr15	83916821	83917172	738	chr15	83916974	83916988	-	1.73e-07	3
chr2	98505164	98505497	739	chr2	98505236	98505250	-	0.000968	2
chr2	98505164	98505497	739	chr2	98505356	98505370	-	0.000968	2
chr10	39978299	39978729	740	chr10	39978329	39978343	-	0.000539	4
chr10	39978299	39978729	740	chr10	39978366	39978380	+	0.000856	4
chr10	39978299	39978729	740	chr10	39978459	39978473	-	0.000539	4
chr10	39978299	39978729	740	chr10	39978543	39978557	+	0.000691	4
chr1	183014227	183014521	741	chr1	183014315	183014329	+	2.34e-06	1
chr5	37129068	37129362	742	chr5	37129160	37129174	-	0.000629	2
chr5	37129068	37129362	742	chr5	37129186	37129200	+	1.19e-07	2
chr6	90802472	90802758	743	chr6	90802570	90802584	+	2.34e-06	3
chr6	90802472	90802758	743	chr6	90802543	90802557	-	0.000131	3
chr6	90802472	90802758	743	chr6	90802602	90802616	-	0.000153	3
chr11	51657472	51657756	744	chr11	51657596	51657610	+	8.28e-05	3
chr11	51657472	51657756	744	chr11	51657474	51657488	+	0.000405	3
chr11	51657472	51657756	744	chr11	51657653	51657667	-	0.000856	3
chr10	88687363	88687625	745	chr10	88687471	88687485	-	1.73e-07	1
chr13	58764763	58765060	746	chr13	58764867	58764881	+	2.95e-05	2
chr13	58764763	58765060	746	chr13	58764879	58764893	+	0.000184	2
chr4	22572819	22573101	747	chr4	22572961	22572975	-	2.11e-05	2
chr4	22572819	22573101	747	chr4	22573064	22573078	-	0.000734	2
chr10	60405840	60406167	748	chr10	60405913	60405927	+	0.000649	3
chr10	60405840	60406167	748	chr10	60406013	60406027	-	1.28e-05	3
chr10	60405840	60406167	748	chr10	60406001	60406015	-	0.000184	3
chr11	78766042	78766316	749	chr11	78766213	78766227	-	0.000367	2
chr11	78766042	78766316	749	chr11	78766159	78766173	-	3.82e-06	2
chr19	3850975	3851296	750	chr19	3851124	3851138	-	0.000669	4
chr19	3850975	3851296	750	chr19	3851087	3851101	+	0.000649	4
chr19	3850975	3851296	750	chr19	3851249	3851263	-	0.000712	4
chr19	3850975	3851296	750	chr19	3851177	3851191	-	0.000506	4
chr11	50706047	50706332	751	chr11	50706276	50706290	-	0.000322	3
chr11	50706047	50706332	751	chr11	50706133	50706147	+	1.28e-05	3
chr11	50706047	50706332	751	chr11	50706230	50706244	-	0.000734	3
chr10	90343676	90343942	752	chr10	90343793	90343807	-	2.34e-06	1
chr13	54977998	54978240	753	chr13	54978114	54978128	-	7.46e-06	1
chr1	19099808	19100110	754	chr1	19100064	19100078	-	0.000856	3
chr1	19099808	19100110	754	chr1	19099933	19099947	-	1.96e-06	3
chr1	19099808	19100110	754	chr1	19099980	19099994	+	8.28e-05	3
chr7	139152334	139152608	755	chr7	139152417	139152431	+	1.19e-07	1
chr5	37227289	37227542	756	chr5	37227412	37227426	-	0.000367	4
chr5	37227289	37227542	756	chr5	37227379	37227393	+	0.000153	4
chr5	37227289	37227542	756	chr5	37227316	37227330	-	0.000734	4
chr5	37227289	37227542	756	chr5	37227318	37227332	+	0.000856	4
[truncated: 3,238 more rows]

## Sheet: Sheet2
Supplemental Table 1. REST-bound genomic regions with repeated consensus RE1 motifs
Chromosome	Region Start	Region End	RE1 Start	RE1 End	Orientation	P-value
chr4	139814837	139815338	139815005	139815019	+	1.87e-05
chr4	139814837	139815338	139814931	139814945	+	0.000432
chr4	139814837	139815338	139814860	139814874	-	0.000539
chr4	139814837	139815338	139814956	139814970	+	0.000126
chr4	139814837	139815338	139814980	139814994	+	1.96e-06
chr4	139814837	139815338	139815168	139815182	+	1.96e-06
chr4	139814837	139815338	139815036	139815050	+	9.83e-06
chr4	139814837	139815338	139815142	139815156	+	2.5e-05
chr4	139814837	139815338	139815061	139815075	+	8.66e-05
chr4	139814837	139815338	139815135	139815149	-	0.000356
chr4	139814837	139815338	139815086	139815100	+	9.83e-06
chr4	139814837	139815338	139815111	139815125	+	5.73e-05
chr4	139814837	139815338	139815315	139815329	-	0.000121
chr4	152173520	152173993	152173824	152173838	-	8.98e-08
chr4	152173520	152173993	152173582	152173596	-	0.000312
chr4	152173520	152173993	152173529	152173543	+	0.00046
chr4	152173520	152173993	152173711	152173725	-	8.98e-08
chr4	152173520	152173993	152173673	152173687	-	8.66e-05
chr4	152173520	152173993	152173628	152173642	-	0.000141
chr4	152173520	152173993	152173650	152173664	-	1.49e-06
chr4	152173520	152173993	152173689	152173703	-	0.00061
chr4	152173520	152173993	152173801	152173815	-	8.98e-08
chr4	152173520	152173993	152173758	152173772	-	8.02e-06
chr4	152173520	152173993	152173865	152173879	+	0.000734
chr4	150663018	150663630	150663281	150663295	-	8.02e-06
chr4	150663018	150663630	150663269	150663283	-	0.000392
chr4	150663018	150663630	150663113	150663127	-	0.000805
chr4	150663018	150663630	150663125	150663139	-	9.2e-06
chr4	150663018	150663630	150663216	150663230	+	0.00091
chr4	150663018	150663630	150663491	150663505	-	7.93e-05
chr4	150663018	150663630	150663374	150663388	-	7.93e-05
chr4	150663018	150663630	150663449	150663463	+	0.000367
chr4	150663018	150663630	150663479	150663493	-	0.000191
chr4	150663018	150663630	150663518	150663532	-	9.83e-06
chr4	150663018	150663630	150663596	150663610	-	0.000539
chr4	150978588	150979473	150978902	150978916	+	1.12e-06
chr4	150978588	150979473	150978794	150978808	+	2.14e-06
chr4	150978588	150979473	150978729	150978743	+	8.57e-06
chr4	150978588	150979473	150978695	150978709	+	2.34e-06
chr4	150978588	150979473	150978762	150978776	+	0.000131
chr4	150978588	150979473	150978857	150978871	+	1.87e-05
chr4	150978588	150979473	150979203	150979217	+	0.000539
chr4	150978588	150979473	150979110	150979124	+	5.2e-05
chr4	150978588	150979473	150979236	150979250	+	3.65e-05
chr4	150978588	150979473	150979259	150979273	+	0.000883
chr10	126118063	126118260	126118201	126118215	+	0.000831
chr10	126118063	126118260	126118168	126118182	+	0.000831
chr10	126118063	126118260	126118130	126118144	-	1.05e-05
chr10	126118063	126118260	126118097	126118111	-	0.000691
chr10	126118063	126118260	126118102	126118116	+	0.000939
chr10	126118063	126118260	126118163	126118177	-	1.05e-05
chr10	126118063	126118260	126118135	126118149	+	0.000831
chr10	126118063	126118260	126118196	126118210	-	1.05e-05
chr10	126118063	126118260	126118229	126118243	-	1.05e-05
chr10	126118063	126118260	126118234	126118248	+	0.000831
chr8	14072522	14072962	14072837	14072851	-	0.000229
chr8	14072522	14072962	14072641	14072655	-	4.05e-05
chr8	14072522	14072962	14072672	14072686	-	3.82e-06
chr8	14072522	14072962	14072692	14072706	-	2.65e-05
chr8	14072522	14072962	14072764	14072778	-	0.000649
chr8	14072522	14072962	14072734	14072748	-	3.82e-06
chr8	14072522	14072962	14072722	14072736	-	0.000649
chr8	14072522	14072962	14072776	14072790	-	3.82e-06
chr8	14072522	14072962	14072906	14072920	+	0.000691
chr4	21639241	21639727	21639436	21639450	-	2.78e-07
chr4	21639241	21639727	21639364	21639378	-	1.92e-07
chr4	21639241	21639727	21639378	21639392	-	0.000312
chr4	21639241	21639727	21639423	21639437	-	0.000883
chr4	21639241	21639727	21639548	21639562	-	8.98e-08
chr4	21639241	21639727	21639470	21639484	-	0.000356
chr4	21639241	21639727	21639489	21639503	-	8.98e-08
chr4	21639241	21639727	21639602	21639616	-	0.000178
chr4	21639241	21639727	21639560	21639574	-	0.000998
chr8	91347788	91348274	91347880	91347894	-	1.92e-07
chr8	91347788	91348274	91348116	91348130	-	0.000574
chr8	91347788	91348274	91348049	91348063	-	6.58e-08
chr8	91347788	91348274	91348026	91348040	+	0.000272
chr8	91347788	91348274	91347995	91348009	+	0.000272
chr8	91347788	91348274	91347894	91347908	-	0.000301
chr8	91347788	91348274	91348083	91348097	-	0.00091
chr8	91347788	91348274	91348102	91348116	-	8.98e-08
chr8	91347788	91348274	91348158	91348172	-	4.82e-06
chr7	26367405	26367821	26367567	26367581	+	0.00046
chr7	26367405	26367821	26367525	26367539	+	1.73e-07
chr7	26367405	26367821	26367459	26367473	+	2.2e-07
chr7	26367405	26367821	26367581	26367595	+	1.2e-05
chr7	26367405	26367821	26367655	26367669	+	0.000367
chr7	26367405	26367821	26367636	26367650	+	1.49e-06
chr7	26367405	26367821	26367701	26367715	+	2.6e-08
chr7	26367405	26367821	26367676	26367690	+	0.000263
chr7	26367405	26367821	26367720	26367734	+	3.46e-05
chr2	157738911	157739483	157739328	157739342	+	1.37e-05
chr2	157738911	157739483	157738948	157738962	-	9.44e-05
chr2	157738911	157739483	157738959	157738973	-	0.000781
chr2	157738911	157739483	157739247	157739261	+	5.47e-07
chr2	157738911	157739483	157739008	157739022	+	4.82e-06
chr2	157738911	157739483	157739000	157739014	-	0.000734
chr2	157738911	157739483	157739093	157739107	+	0.000344
chr2	157738911	157739483	157739291	157739305	+	9.2e-06
chr4	155233443	155233873	155233674	155233688	+	4.47e-06
chr4	155233443	155233873	155233548	155233562	+	1.76e-05
chr4	155233443	155233873	155233560	155233574	+	0.000198
chr4	155233443	155233873	155233591	155233605	+	0.000254
chr4	155233443	155233873	155233651	155233665	+	0.000322
chr4	155233443	155233873	155233639	155233653	+	0.000649
chr4	155233443	155233873	155233703	155233717	+	6.3e-05
chr4	155233443	155233873	155233792	155233806	+	7.58e-05
chr15	83342996	83343432	83343042	83343056	+	2.2e-07
chr15	83342996	83343432	83343028	83343042	+	0.000165
chr15	83342996	83343432	83343216	83343230	+	2.34e-06
chr15	83342996	83343432	83343102	83343116	+	2.23e-05
chr15	83342996	83343432	83343123	83343137	+	8.98e-08
chr15	83342996	83343432	83343165	83343179	+	0.000757
chr15	83342996	83343432	83343288	83343302	+	0.000171
chr15	83342996	83343432	83343302	83343316	+	1.92e-07
chr6	84624193	84624553	84624390	84624404	+	1.92e-07
chr6	84624193	84624553	84624282	84624296	+	6.58e-08
chr6	84624193	84624553	84624200	84624214	+	1.87e-05
chr6	84624193	84624553	84624323	84624337	+	0.000171
chr6	84624193	84624553	84624337	84624351	+	2.78e-07
chr6	84624193	84624553	84624491	84624505	+	0.000246
chr6	84624193	84624553	84624470	84624484	+	0.00046
chr6	84624193	84624553	84624456	84624470	+	0.000291
chr4	154392826	154393240	154393072	154393086	-	3.46e-05
chr4	154392826	154393240	154393058	154393072	-	0.00046
chr4	154392826	154393240	154392968	154392982	-	0.000734
chr4	154392826	154393240	154392941	154392955	+	1.12e-05
chr4	154392826	154393240	154393018	154393032	+	0.000301
chr4	154392826	154393240	154393196	154393210	+	0.000153
chr4	154392826	154393240	154393095	154393109	-	0.000344
chr4	154392826	154393240	154393221	154393235	-	0.000312
chr7	97608829	97609233	97608908	97608922	-	0.000111
chr7	97608829	97609233	97608949	97608963	-	0.000165
chr7	97608829	97609233	97608929	97608943	-	0.000165
chr7	97608829	97609233	97609004	97609018	-	2.2e-07
chr7	97608829	97609233	97608963	97608977	-	0.000312
chr7	97608829	97609233	97609067	97609081	-	2.2e-07
chr7	97608829	97609233	97609025	97609039	-	0.000734
chr7	97608829	97609233	97609045	97609059	+	0.000968
chr5	147039124	147039451	147039261	147039275	+	4.13e-06
chr5	147039124	147039451	147039206	147039220	+	1.19e-07
chr5	147039124	147039451	147039194	147039208	+	0.000734
chr5	147039124	147039451	147039247	147039261	+	0.000405
chr5	147039124	147039451	147039398	147039412	+	1.65e-05
chr5	147039124	147039451	147039384	147039398	+	9.2e-06
chr5	147039124	147039451	147039314	147039328	+	1.29e-08
chr5	147039124	147039451	147039336	147039350	+	0.00061
chr12	106560347	106560859	106560729	106560743	+	0.000136
chr12	106560347	106560859	106560408	106560422	+	5.46e-05
chr12	106560347	106560859	106560667	106560681	+	1.12e-06
chr12	106560347	106560859	106560502	106560516	+	2.34e-06
chr12	106560347	106560859	106560456	106560470	+	0.00091
chr12	106560347	106560859	106560620	106560634	+	9.85e-05
chr12	106560347	106560859	106560519	106560533	+	0.000107
chr6	55058386	55058727	55058603	55058617	-	0.00061
chr6	55058386	55058727	55058428	55058442	-	0.000301
chr6	55058386	55058727	55058394	55058408	+	0.00049
chr6	55058386	55058727	55058411	55058425	-	0.000669
chr6	55058386	55058727	55058557	55058571	-	1.96e-06
chr6	55058386	55058727	55058508	55058522	-	0.000116
chr6	55058386	55058727	55058611	55058625	+	0.000805
chr17	56381105	56381821	56381516	56381530	-	0.000333
chr17	56381105	56381821	56381190	56381204	-	1.87e-05
chr17	56381105	56381821	56381471	56381485	-	0.000291
chr17	56381105	56381821	56381743	56381757	+	0.000432
chr17	56381105	56381821	56381646	56381660	-	6.01e-06
chr17	56381105	56381821	56381587	56381601	-	1.65e-05
chr17	56381105	56381821	56381754	56381768	-	0.000691
chr7	129814326	129814695	129814448	129814462	+	5.2e-06
chr7	129814326	129814695	129814368	129814382	-	0.000669
chr7	129814326	129814695	129814520	129814534	+	1.87e-05
chr7	129814326	129814695	129814512	129814526	-	0.00061
chr7	129814326	129814695	129814631	129814645	+	6.01e-05
chr7	129814326	129814695	129814626	129814640	-	0.000246
chr7	129814326	129814695	129814547	129814561	+	0.000312
chr2	98506298	98507614	98506907	98506921	+	0.000883
chr2	98506298	98507614	98506400	98506414	+	0.000968
chr2	98506298	98507614	98506815	98506829	-	0.000206
chr2	98506298	98507614	98506699	98506713	-	0.000333
chr2	98506298	98507614	98506641	98506655	+	0.000968
chr2	98506298	98507614	98507141	98507155	+	0.000883
chr2	98506298	98507614	98507392	98507406	+	0.000883
chr11	62418717	62419993	62419618	62419632	+	0.000757
chr11	62418717	62419993	62419170	62419184	+	0.000141
chr11	62418717	62419993	62419019	62419033	-	3.84e-05
chr11	62418717	62419993	62419237	62419251	+	0.000805
chr11	62418717	62419993	62419367	62419381	-	2.65e-05
chr11	62418717	62419993	62419414	62419428	+	0.00061
chr11	62418717	62419993	62419693	62419707	-	0.000691
chr4	101222993	101223632	101223446	101223460	-	6.01e-05
chr4	101222993	101223632	101222996	101223010	+	0.000291
chr4	101222993	101223632	101223038	101223052	+	2.6e-08
chr4	101222993	101223632	101223335	101223349	-	0.000126
chr4	101222993	101223632	101223076	101223090	+	0.000883
chr4	101222993	101223632	101223195	101223209	+	0.00091
chr4	101222993	101223632	101223474	101223488	+	0.00061
chr5	92787111	92787474	92787239	92787253	-	0.000237
chr5	92787111	92787474	92787225	92787239	-	2.47e-07
chr5	92787111	92787474	92787158	92787172	-	6.08e-07
chr5	92787111	92787474	92787355	92787369	-	2.2e-07
chr5	92787111	92787474	92787280	92787294	-	3.53e-06
chr5	92787111	92787474	92787316	92787330	-	0.000883
chr5	92787111	92787474	92787378	92787392	+	0.000131
chr9	88414661	88415781	88415158	88415172	+	0.000263
chr9	88414661	88415781	88415134	88415148	+	8.28e-05
chr9	88414661	88415781	88414689	88414703	+	0.000805
chr9	88414661	88415781	88414739	88414753	+	9.85e-05
chr9	88414661	88415781	88414722	88414736	-	0.000191
chr9	88414661	88415781	88415178	88415192	-	2.8e-05
chr9	88414661	88415781	88415320	88415334	-	0.000333
chr1	91925037	91925306	91925103	91925117	+	4.47e-06
chr1	91925037	91925306	91925115	91925129	+	4.47e-06
chr1	91925037	91925306	91925241	91925255	+	9.44e-05
chr1	91925037	91925306	91925139	91925153	+	0.000475
chr1	91925037	91925306	91925127	91925141	+	4.47e-06
chr1	91925037	91925306	91925234	91925248	-	0.000405
chr1	91925037	91925306	91925151	91925165	+	0.000475
chr7	34328515	34328855	34328714	34328728	-	6.74e-07
chr7	34328515	34328855	34328598	34328612	-	6.3e-05
chr7	34328515	34328855	34328543	34328557	-	2.34e-06
chr7	34328515	34328855	34328565	34328579	-	2.95e-05
chr7	34328515	34328855	34328656	34328670	-	9.44e-05
chr7	34328515	34328855	34328627	34328641	-	0.000237
chr7	34328515	34328855	34328812	34328826	+	0.000712
chr6	39798893	39799174	39799154	39799168	+	4.48e-05
chr6	39798893	39799174	39799044	39799058	-	0.000539
chr6	39798893	39799174	39798959	39798973	-	1.87e-05
chr6	39798893	39799174	39798905	39798919	+	3e-06
chr6	39798893	39799174	39799021	39799035	-	0.000126
chr6	39798893	39799174	39798964	39798978	+	0.00061
chr6	39798893	39799174	39799149	39799163	-	0.000757
chr7	6362742	6363231	6362878	6362892	-	2.95e-05
chr7	6362742	6363231	6363065	6363079	-	0.000781
chr7	6362742	6363231	6362991	6363005	-	0.000805
chr7	6362742	6363231	6363025	6363039	+	0.000968
chr7	6362742	6363231	6363021	6363035	-	0.000344
chr7	6362742	6363231	6363137	6363151	-	3.84e-05
chr15	77950175	77950610	77950503	77950517	+	0.000805
chr15	77950175	77950610	77950336	77950350	-	2.78e-07
chr15	77950175	77950610	77950280	77950294	-	4.05e-05
chr15	77950175	77950610	77950392	77950406	-	1.12e-06
chr15	77950175	77950610	77950446	77950460	-	0.000121
chr15	77950175	77950610	77950518	77950532	+	0.000998
chr19	4988996	4989523	4989167	4989181	-	5.6e-06
chr19	4988996	4989523	4989128	4989142	-	9.83e-06
chr19	4988996	4989523	4989135	4989149	+	0.000116
chr19	4988996	4989523	4989246	4989260	-	7.24e-05
chr19	4988996	4989523	4989210	4989224	-	0.000691
chr19	4988996	4989523	4989299	4989313	+	0.000998
chr14	64331929	64332290	64332220	64332234	-	0.000939
chr14	64331929	64332290	64332036	64332050	-	1.28e-05
chr14	64331929	64332290	64332002	64332016	-	9.21e-07
chr14	64331929	64332290	64331968	64331982	-	0.000121
chr14	64331929	64332290	64332065	64332079	-	1.87e-05
chr14	64331929	64332290	64332145	64332159	-	0.000198
chr7	3220362	3222608	3220799	3220813	-	0.000883
chr7	3220362	3222608	3220686	3220700	-	0.000272
chr7	3220362	3222608	3221549	3221563	+	0.000669
chr7	3220362	3222608	3220832	3220846	+	0.000691
chr7	3220362	3222608	3221506	3221520	-	0.000153
chr7	3220362	3222608	3221385	3221399	-	0.000322
chr5	23615947	23616339	23616079	23616093	+	2.6e-08
chr5	23615947	23616339	23616016	23616030	+	2.2e-07
chr5	23615947	23616339	23616209	23616223	+	7.93e-05
chr5	23615947	23616339	23616193	23616207	+	1.92e-07
chr5	23615947	23616339	23616134	23616148	+	2.95e-05
chr5	23615947	23616339	23616168	23616182	+	0.000301
chr9	108729115	108729597	108729352	108729366	+	0.000446
chr9	108729115	108729597	108729306	108729320	-	0.000184
chr9	108729115	108729597	108729129	108729143	-	9.04e-05
chr9	108729115	108729597	108729134	108729148	+	0.000221
chr9	108729115	108729597	108729428	108729442	-	3.82e-06
chr9	108729115	108729597	108729389	108729403	-	6.01e-06
chr13	100980559	100980903	100980727	100980741	-	8.98e-08
chr13	100980559	100980903	100980653	100980667	-	0.00061
chr13	100980559	100980903	100980602	100980616	+	0.000998
chr13	100980559	100980903	100980709	100980723	-	0.000998
chr13	100980559	100980903	100980675	100980689	-	3.53e-06
chr13	100980559	100980903	100980817	100980831	-	9.2e-06
chr7	46711192	46711597	46711333	46711347	-	2.54e-06
chr7	46711192	46711597	46711266	46711280	-	0.000522
chr7	46711192	46711597	46711223	46711237	-	9.85e-05
chr7	46711192	46711597	46711300	46711314	-	0.000629
chr7	46711192	46711597	46711374	46711388	-	2.6e-08
chr7	46711192	46711597	46711435	46711449	-	2.2e-07
chr16	35302529	35303324	35302848	35302862	+	0.000367
chr16	35302529	35303324	35302655	35302669	-	9.21e-07
chr16	35302529	35303324	35303128	35303142	+	1.19e-07
chr16	35302529	35303324	35302922	35302936	+	0.000206
chr16	35302529	35303324	35302883	35302897	+	0.000301
chr16	35302529	35303324	35303205	35303219	+	0.000475
chr7	4130084	4130412	4130309	4130323	+	0.000141
chr7	4130084	4130412	4130244	4130258	-	4.47e-06
chr7	4130084	4130412	4130138	4130152	+	0.000131
chr7	4130084	4130412	4130190	4130204	+	0.000939
chr7	4130084	4130412	4130255	4130269	-	0.000291
chr7	4130084	4130412	4130394	4130408	+	0.000998
chr7	89773932	89774258	89774074	89774088	+	0.000805
chr7	89773932	89774258	89774053	89774067	+	0.000198
chr7	89773932	89774258	89773980	89773994	+	0.000165
chr7	89773932	89774258	89774001	89774015	+	0.000831
chr7	89773932	89774258	89774034	89774048	+	7.73e-08
chr7	89773932	89774258	89774154	89774168	+	3.5e-07
chr4	139839363	139839740	139839440	139839454	+	4.82e-06
chr4	139839363	139839740	139839393	139839407	-	0.000191
chr4	139839363	139839740	139839479	139839493	+	2.65e-05
chr4	139839363	139839740	139839558	139839572	+	2.78e-07
chr4	139839363	139839740	139839494	139839508	-	6.6e-05
chr4	139839363	139839740	139839570	139839584	+	0.000333
chr5	23863311	23863634	23863394	23863408	-	0.000629
chr5	23863311	23863634	23863458	23863472	+	0.000998
chr5	23863311	23863634	23863426	23863440	+	8.66e-05
chr5	23863311	23863634	23863453	23863467	-	0.000998
chr5	23863311	23863634	23863532	23863546	+	0.000344
chr5	23863311	23863634	23863505	23863519	+	0.000856
chr5	112330802	112331100	112330841	112330855	-	0.000691
chr5	112330802	112331100	112330820	112330834	+	9.21e-07
chr5	112330802	112331100	112330908	112330922	+	5.2e-06
chr5	112330802	112331100	112330899	112330913	-	0.000367
chr5	112330802	112331100	112330869	112330883	+	0.000805
chr5	112330802	112331100	112331067	112331081	+	0.000522
chr7	32240865	32241230	32240995	32241009	+	9.44e-05
chr7	32240865	32241230	32240966	32240980	+	1.98e-05
chr7	32240865	32241230	32240868	32240882	-	0.000184
chr7	32240865	32241230	32241086	32241100	+	2.5e-05
chr7	32240865	32241230	32241108	32241122	+	0.000405
chr7	32240865	32241230	32241120	32241134	-	0.000446
chr2	139921838	139922162	139921937	139921951	-	8.98e-08
chr2	139921838	139922162	139921855	139921869	-	0.000322
chr2	139921838	139922162	139921863	139921877	+	0.000691
chr2	139921838	139922162	139922004	139922018	-	0.000312
chr2	139921838	139922162	139921990	139922004	-	1.92e-07
chr2	139921838	139922162	139921971	139921985	-	0.00091
chr14	80615681	80616031	80615823	80615837	-	0.000116
chr14	80615681	80616031	80615820	80615834	+	0.000475
chr14	80615681	80616031	80615981	80615995	-	0.000191
chr14	80615681	80616031	80615835	80615849	-	6.01e-05
chr14	80615681	80616031	80615865	80615879	-	0.000178
chr14	80615681	80616031	80615928	80615942	-	0.000998
chr18	74352878	74353149	74352943	74352957	+	0.000691
chr18	74352878	74353149	74353027	74353041	-	1.92e-07
chr18	74352878	74353149	74352960	74352974	-	6.35e-09
chr18	74352878	74353149	74353078	74353092	-	0.000159
chr18	74352878	74353149	74353040	74353054	-	0.000805
chr18	74352878	74353149	74353096	74353110	-	0.00091
chr14	80656974	80657297	80657168	80657182	-	0.000312
chr14	80656974	80657297	80657079	80657093	+	1.46e-05
chr14	80656974	80657297	80657050	80657064	-	0.000883
chr14	80656974	80657297	80657075	80657089	-	0.000856
chr14	80656974	80657297	80657145	80657159	+	0.000432
chr14	80656974	80657297	80657228	80657242	-	6.6e-05
chr7	68119091	68119446	68119201	68119215	+	0.000165
chr7	68119091	68119446	68119172	68119186	+	0.000367
chr7	68119091	68119446	68119288	68119302	+	2.23e-05
chr7	68119091	68119446	68119259	68119273	+	2.8e-05
chr7	68119091	68119446	68119230	68119244	+	6.3e-05
chr7	68119091	68119446	68119419	68119433	+	0.000831
chr18	66720659	66720939	66720791	66720805	-	6.58e-08
chr18	66720659	66720939	66720723	66720737	-	0.000379
chr18	66720659	66720939	66720748	66720762	-	0.000805
chr18	66720659	66720939	66720813	66720827	-	2.34e-06
chr18	66720659	66720939	66720908	66720922	+	0.000539
chr18	66720659	66720939	66720846	66720860	-	0.000221
chr6	70187153	70187457	70187196	70187210	+	0.000379
chr6	70187153	70187457	70187170	70187184	+	0.00091
chr6	70187153	70187457	70187315	70187329	+	2.78e-07
chr6	70187153	70187457	70187263	70187277	+	8.29e-07
chr6	70187153	70187457	70187336	70187350	+	0.000405
chr6	70187153	70187457	70187382	70187396	+	1.92e-07
chr8	86755790	86756071	86755801	86755815	+	8.98e-08
chr8	86755790	86756071	86755855	86755869	+	0.000475
chr8	86755790	86756071	86755841	86755855	+	1.98e-05
chr8	86755790	86756071	86755918	86755932	+	8.98e-08
chr8	86755790	86756071	86755867	86755881	-	0.000506
chr8	86755790	86756071	86755940	86755954	+	0.000171
chr11	65526487	65526824	65526551	65526565	+	0.000178
chr11	65526487	65526824	65526722	65526736	+	8.29e-07
chr11	65526487	65526824	65526653	65526667	+	0.000184
chr11	65526487	65526824	65526602	65526616	+	0.000734
chr11	65526487	65526824	65526614	65526628	+	6.58e-08
chr11	65526487	65526824	65526708	65526722	+	0.000691
chr17	39244215	39244447	39244364	39244378	+	4.48e-05
chr17	39244215	39244447	39244216	39244230	+	1.96e-06
chr17	39244215	39244447	39244332	39244346	+	6.3e-05
chr17	39244215	39244447	39244274	39244288	+	9.44e-05
chr17	39244215	39244447	39244303	39244317	+	2.8e-05
chr17	39244215	39244447	39244386	39244400	+	1.12e-06
chr14	26213805	26214093	26214037	26214051	+	0.00049
chr14	26213805	26214093	26213851	26213865	+	0.000198
chr14	26213805	26214093	26213831	26213845	+	0.000263
chr14	26213805	26214093	26213925	26213939	-	0.000506
chr14	26213805	26214093	26213956	26213970	+	9.04e-05
chr14	26213805	26214093	26214012	26214026	-	0.000968
chr6	58280803	58281084	58280865	58280879	+	4.91e-07
chr6	58280803	58281084	58280981	58280995	+	2.8e-05
chr6	58280803	58281084	58280894	58280908	+	9.44e-05
chr6	58280803	58281084	58280952	58280966	+	2.8e-05
chr6	58280803	58281084	58280923	58280937	+	7.93e-05
chr6	58280803	58281084	58281010	58281024	+	6.3e-05
chr6	39822030	39822315	39822280	39822294	+	0.000805
chr6	39822030	39822315	39822058	39822072	-	1.56e-05
chr6	39822030	39822315	39822103	39822117	+	0.00061
chr6	39822030	39822315	39822122	39822136	+	0.000592
chr6	39822030	39822315	39822232	39822246	-	0.00061
chr6	39822030	39822315	39822264	39822278	+	0.000691
chr2	39662373	39662572	39662388	39662402	+	4.91e-07
chr2	39662373	39662572	39662504	39662518	+	6.3e-05
chr2	39662373	39662572	39662417	39662431	+	3.65e-05
chr2	39662373	39662572	39662475	39662489	+	6.3e-05
chr2	39662373	39662572	39662446	39662460	+	7.93e-05
chr2	39662373	39662572	39662532	39662546	+	6.3e-05
chr3	32882664	32882888	32882822	32882836	+	2.2e-07
chr3	32882664	32882888	32882768	32882782	+	1.49e-06
chr3	32882664	32882888	32882727	32882741	+	0.000121
chr3	32882664	32882888	32882754	32882768	+	0.000291
chr3	32882664	32882888	32882787	32882801	+	0.000322
chr3	32882664	32882888	32882865	32882879	+	0.000263
chr16	22007474	22007694	22007562	22007576	+	0.000191
chr16	22007474	22007694	22007507	22007521	-	0.000446
chr16	22007474	22007694	22007522	22007536	+	0.000522
chr16	22007474	22007694	22007648	22007662	+	3.25e-06
chr16	22007474	22007694	22007594	22007608	-	4.95e-05
chr16	22007474	22007694	22007565	22007579	-	0.000539
chr15	84659848	84660287	84660068	84660082	+	2.23e-05
chr15	84659848	84660287	84660024	84660038	+	1.12e-05
chr15	84659848	84660287	84659988	84660002	-	4.26e-05
chr15	84659848	84660287	84659973	84659987	+	6.92e-05
chr15	84659848	84660287	84660036	84660050	+	0.000712
chr15	72398993	72399408	72399134	72399148	+	2.2e-07
chr15	72398993	72399408	72399086	72399100	+	0.000103
chr15	72398993	72399408	72399213	72399227	+	2.54e-06
chr15	72398993	72399408	72399164	72399178	+	1.51e-07
chr15	72398993	72399408	72399159	72399173	-	2.37e-05
chr11	118446177	118446536	118446380	118446394	+	8.66e-05
chr11	118446177	118446536	118446309	118446323	+	0.000246
chr11	118446177	118446536	118446265	118446279	+	7.24e-05
chr11	118446177	118446536	118446513	118446527	+	0.000237
chr11	118446177	118446536	118446415	118446429	+	0.000649
chr2	181036774	181037164	181036922	181036936	-	2.6e-08
chr2	181036774	181037164	181037135	181037149	+	0.000475
chr2	181036774	181037164	181036988	181037002	-	8.98e-08
chr2	181036774	181037164	181037034	181037048	-	0.000171
chr2	181036774	181037164	181037000	181037014	-	0.00091
chr9	99118728	99119144	99118783	99118797	+	0.000883
chr9	99118728	99119144	99118992	99119006	-	2.2e-07
chr9	99118728	99119144	99118859	99118873	-	1.79e-06
chr9	99118728	99119144	99118914	99118928	-	6.58e-08
chr9	99118728	99119144	99119119	99119133	+	0.00046
chr2	118934300	118934688	118934436	118934450	-	5.6e-06
chr2	118934300	118934688	118934414	118934428	-	0.000432
chr2	118934300	118934688	118934569	118934583	-	5.46e-05
chr2	118934300	118934688	118934501	118934515	-	6.58e-08
chr2	118934300	118934688	118934482	118934496	-	0.000475
chr13	55072198	55072590	55072444	55072458	-	6.95e-06
chr13	55072198	55072590	55072383	55072397	-	0.000856
chr13	55072198	55072590	55072256	55072270	-	0.000432
chr13	55072198	55072590	55072406	55072420	-	6.95e-06
chr13	55072198	55072590	55072425	55072439	-	6.95e-06
chr16	62758211	62758581	62758370	62758384	+	2.6e-08
chr16	62758211	62758581	62758318	62758332	+	1.24e-06
chr16	62758211	62758581	62758259	62758273	+	1.87e-05
chr16	62758211	62758581	62758304	62758318	+	0.000856
chr16	62758211	62758581	62758438	62758452	+	1.37e-05
chr8	86978500	86978879	86978847	86978861	-	0.00046
chr8	86978500	86978879	86978533	86978547	-	0.000831
chr8	86978500	86978879	86978516	86978530	+	0.000691
chr8	86978500	86978879	86978641	86978655	+	0.000282
chr8	86978500	86978879	86978691	86978705	-	0.000379
chr12	44073801	44074160	44073922	44073936	+	1.49e-06
chr12	44073801	44074160	44073906	44073920	+	3.11e-07
chr12	44073801	44074160	44073954	44073968	+	1.49e-06
chr12	44073801	44074160	44073938	44073952	+	1.49e-06
chr12	44073801	44074160	44074077	44074091	+	0.00049
chr8	87470943	87471505	87471219	87471233	+	1.05e-05
chr8	87470943	87471505	87471214	87471228	-	0.000968
chr8	87470943	87471505	87471245	87471259	+	1.65e-05
chr8	87470943	87471505	87471231	87471245	+	0.000556
chr8	87470943	87471505	87471468	87471482	-	0.000649
chr11	119354153	119354531	119354353	119354367	-	6.58e-08
chr11	119354153	119354531	119354300	119354314	-	1.92e-07
chr11	119354153	119354531	119354210	119354224	-	0.000178
chr11	119354153	119354531	119354313	119354327	-	0.000111
chr11	119354153	119354531	119354334	119354348	-	0.000574
chr15	89283762	89284152	89283912	89283926	-	0.000712
chr15	89283762	89284152	89283892	89283906	-	9.04e-05
chr15	89283762	89284152	89283799	89283813	+	5.2e-05
chr15	89283762	89284152	89284098	89284112	+	0.000574
chr15	89283762	89284152	89283929	89283943	-	4.92e-08
chr7	117845111	117845571	117845210	117845224	-	0.000883
chr7	117845111	117845571	117845357	117845371	+	0.000392
chr7	117845111	117845571	117845349	117845363	-	0.000998
chr7	117845111	117845571	117845346	117845360	-	0.000556
chr7	117845111	117845571	117845395	117845409	-	3.92e-07
chr2	156502690	156503069	156502811	156502825	+	0.000198
chr2	156502690	156503069	156502780	156502794	-	0.000229
chr2	156502690	156503069	156502913	156502927	+	1.56e-05
chr2	156502690	156503069	156502829	156502843	+	0.000418
chr2	156502690	156503069	156502844	156502858	-	0.000669
chr2	178928464	178928816	178928604	178928618	+	3.13e-08
chr2	178928464	178928816	178928592	178928606	+	6.01e-05
chr2	178928464	178928816	178928548	178928562	-	0.000237
chr2	178928464	178928816	178928576	178928590	+	0.000418
chr2	178928464	178928816	178928785	178928799	-	0.000691
chr1	162969299	162970772	162970701	162970715	-	0.000757
chr1	162969299	162970772	162970225	162970239	+	0.000998
chr1	162969299	162970772	162969740	162969754	+	0.000379
chr1	162969299	162970772	162969527	162969541	+	0.000506
chr1	162969299	162970772	162970375	162970389	+	0.000107
chr3	31207819	31208158	31208068	31208082	-	0.000506
chr3	31207819	31208158	31207977	31207991	-	1.87e-05
chr3	31207819	31208158	31207902	31207916	-	0.000367
chr3	31207819	31208158	31207826	31207840	-	0.000939
chr3	31207819	31208158	31207907	31207921	+	0.00046
chr7	30549804	30550113	30549964	30549978	+	2.78e-07
chr7	30549804	30550113	30549878	30549892	+	0.000556
chr7	30549804	30550113	30549859	30549873	+	0.000968
chr7	30549804	30550113	30549896	30549910	+	4.82e-06
chr7	30549804	30550113	30550051	30550065	+	0.000781
chr2	98502307	98503205	98502993	98503007	+	0.000883
chr2	98502307	98503205	98502693	98502707	+	0.000968
chr2	98502307	98503205	98502514	98502528	-	0.000629
chr2	98502307	98503205	98502345	98502359	+	0.000968
chr2	98502307	98503205	98502813	98502827	+	0.000968
chr4	133524358	133524686	133524476	133524490	+	6.01e-06
chr4	133524358	133524686	133524430	133524444	+	0.000939
chr4	133524358	133524686	133524386	133524400	-	9.85e-05
chr4	133524358	133524686	133524391	133524405	+	0.00061
chr4	133524358	133524686	133524652	133524666	+	0.000831
chr6	103703963	103704293	103704110	103704124	+	1.02e-06
chr6	103703963	103704293	103704043	103704057	+	0.000291
chr6	103703963	103704293	103704057	103704071	+	8.29e-07
chr6	103703963	103704293	103704105	103704119	-	0.000263
chr6	103703963	103704293	103704208	103704222	+	0.000522
chr11	83234879	83235314	83235174	83235188	+	0.000379
chr11	83234879	83235314	83234984	83234998	+	1.79e-06
chr11	83234879	83235314	83235109	83235123	-	0.000237
chr11	83234879	83235314	83235193	83235207	+	4.71e-05
chr11	83234879	83235314	83235287	83235301	+	0.000556
chr2	178935282	178935642	178935395	178935409	+	5.47e-07
chr2	178935282	178935642	178935388	178935402	-	0.000272
chr2	178935282	178935642	178935433	178935447	-	0.000229
chr2	178935282	178935642	178935440	178935454	+	5.47e-07
chr2	178935282	178935642	178935570	178935584	+	0.000939
chr11	80146308	80146572	80146373	80146387	+	0.000126
chr11	80146308	80146572	80146348	80146362	-	0.000246
chr11	80146308	80146572	80146343	80146357	-	0.000831
chr11	80146308	80146572	80146550	80146564	+	0.000574
chr11	80146308	80146572	80146410	80146424	-	7.73e-08
chr10	23502760	23504236	23502790	23502804	-	0.000159
chr10	23502760	23504236	23504078	23504092	-	0.000272
chr10	23502760	23504236	23504055	23504069	+	0.000432
chr10	23502760	23504236	23503713	23503727	-	0.000712
chr10	23502760	23504236	23503756	23503770	-	0.000805
chr4	151661106	151661399	151661345	151661359	+	0.000301
chr4	151661106	151661399	151661260	151661274	+	0.000712
chr4	151661106	151661399	151661181	151661195	-	0.000734
chr4	151661106	151661399	151661206	151661220	+	9.2e-06
chr4	151661106	151661399	151661348	151661362	-	0.000757
chr5	27220978	27221273	27221121	27221135	-	0.000103
chr5	27220978	27221273	27221042	27221056	-	1.2e-05
chr5	27220978	27221273	27221078	27221092	+	9.44e-05
chr5	27220978	27221273	27221093	27221107	-	0.000939
chr5	27220978	27221273	27221152	27221166	+	0.000669
chr11	41813045	41813358	41813286	41813300	+	0.000171
chr11	41813045	41813358	41813152	41813166	+	2.8e-05
chr11	41813045	41813358	41813125	41813139	+	0.000171
chr11	41813045	41813358	41813147	41813161	-	0.000291
chr11	41813045	41813358	41813214	41813228	-	0.000178
chr11	87734540	87734826	87734671	87734685	-	8.57e-06
chr11	87734540	87734826	87734659	87734673	-	0.000649
chr11	87734540	87734826	87734576	87734590	-	0.00061
chr11	87734540	87734826	87734699	87734713	-	0.000418
chr11	87734540	87734826	87734683	87734697	+	0.00049
chr1	38996542	38996812	38996774	38996788	-	0.000301
chr1	38996542	38996812	38996627	38996641	+	2.77e-06
chr1	38996542	38996812	38996545	38996559	-	0.000506
chr1	38996542	38996812	38996562	38996576	-	0.000159
chr1	38996542	38996812	38996570	38996584	+	0.000734
chr12	34023084	34023423	34023238	34023252	-	1.12e-06
chr12	34023084	34023423	34023226	34023240	-	0.000263
chr12	34023084	34023423	34023136	34023150	+	0.000405
chr12	34023084	34023423	34023207	34023221	-	0.000153
chr12	34023084	34023423	34023212	34023226	-	0.000282
chr5	35874369	35874655	35874558	35874572	-	0.000432
chr5	35874369	35874655	35874445	35874459	-	0.000757
chr5	35874369	35874655	35874487	35874501	+	0.000939
chr5	35874369	35874655	35874465	35874479	+	1.05e-05
chr5	35874369	35874655	35874511	35874525	+	3.29e-05
chr7	25735393	25735708	25735636	25735650	-	4.05e-05
chr7	25735393	25735708	25735544	25735558	-	0.000669
chr7	25735393	25735708	25735515	25735529	+	0.000282
chr7	25735393	25735708	25735400	25735414	-	0.000392
chr7	25735393	25735708	25735644	25735658	-	0.000649
chr5	37401038	37401513	37401159	37401173	-	0.000206
chr5	37401038	37401513	37401111	37401125	+	0.000206
chr5	37401038	37401513	37401404	37401418	-	0.000475
chr5	37401038	37401513	37401239	37401253	-	0.000475
chr5	37401038	37401513	37401322	37401336	-	0.000475
chr11	57247747	57248020	57247988	57248002	+	0.000301
chr11	57247747	57248020	57247779	57247793	+	0.000574
chr11	57247747	57248020	57247836	57247850	+	1.12e-05
chr11	57247747	57248020	57247819	57247833	-	0.000392
chr11	57247747	57248020	57247925	57247939	-	7.93e-05
chr3	91017293	91017578	91017422	91017436	+	6.3e-05
chr3	91017293	91017578	91017393	91017407	+	0.000107
chr3	91017293	91017578	91017364	91017378	+	0.000221
chr3	91017293	91017578	91017477	91017491	+	1.12e-06
chr3	91017293	91017578	91017455	91017469	+	2.5e-05
chr11	78146265	78146533	78146372	78146386	+	0.000805
chr11	78146265	78146533	78146294	78146308	+	0.000237
chr11	78146265	78146533	78146359	78146373	-	0.000805
chr11	78146265	78146533	78146515	78146529	+	3.53e-06
chr11	78146265	78146533	78146487	78146501	-	0.000539
chr12	30215346	30215644	30215381	30215395	+	0.000629
chr12	30215346	30215644	30215374	30215388	-	0.000998
chr12	30215346	30215644	30215490	30215504	+	3e-06
chr12	30215346	30215644	30215397	30215411	+	0.000136
chr12	30215346	30215644	30215441	30215455	-	0.000805
chr9	20679507	20679816	20679595	20679609	+	0.000301
chr9	20679507	20679816	20679559	20679573	+	0.000998
chr9	20679507	20679816	20679690	20679704	+	0.000592
chr9	20679507	20679816	20679619	20679633	+	8.66e-05
chr9	20679507	20679816	20679625	20679639	+	0.00046
chr13	55677356	55677664	55677608	55677622	-	1.79e-06
chr13	55677356	55677664	55677362	55677376	+	0.000379
chr13	55677356	55677664	55677501	55677515	-	6.58e-08
chr13	55677356	55677664	55677450	55677464	-	3.53e-06
chr13	55677356	55677664	55677640	55677654	+	6.92e-05
chr9	64514415	64514704	64514522	64514536	-	0.000282
chr9	64514415	64514704	64514542	64514556	-	3.11e-07
chr9	64514415	64514704	64514645	64514659	+	0.000237
chr9	64514415	64514704	64514569	64514583	+	0.000592
chr9	64514415	64514704	64514672	64514686	-	0.000254
chr5	112416077	112416372	112416210	112416224	-	0.000556
chr5	112416077	112416372	112416200	112416214	-	0.000147
chr5	112416077	112416372	112416278	112416292	+	5.46e-05
chr5	112416077	112416372	112416217	112416231	+	0.00091
chr5	112416077	112416372	112416334	112416348	+	0.000206
chr13	75226129	75226429	75226263	75226277	+	0.000221
chr13	75226129	75226429	75226222	75226236	+	2.8e-05
chr13	75226129	75226429	75226160	75226174	+	0.000147
chr13	75226129	75226429	75226270	75226284	+	0.000939
chr13	75226129	75226429	75226413	75226427	-	0.000856
chr5	136218001	136218320	136218296	136218310	-	0.000522
chr5	136218001	136218320	136218025	136218039	-	0.000213
chr5	136218001	136218320	136218224	136218238	-	0.000213
chr5	136218001	136218320	136218161	136218175	-	0.000301
chr5	136218001	136218320	136218301	136218315	+	0.000291
chr7	10910873	10911183	10911072	10911086	-	0.000592
chr7	10910873	10911183	10910985	10910999	-	0.000649
chr7	10910873	10911183	10911014	10911028	-	0.000592
chr7	10910873	10911183	10911043	10911057	-	0.000592
chr7	10910873	10911183	10911101	10911115	-	0.000213
chr1	8113301	8113554	8113323	8113337	+	4.91e-07
chr1	8113301	8113554	8113414	8113428	+	0.000246
chr1	8113301	8113554	8113381	8113395	+	6.3e-05
chr1	8113301	8113554	8113352	8113366	+	0.000141
chr1	8113301	8113554	8113436	8113450	+	3.12e-05
chr1	167060595	167060873	167060612	167060626	-	0.000574
chr1	167060595	167060873	167060823	167060837	+	7.93e-05
chr1	167060595	167060873	167060701	167060715	-	6.58e-08
chr1	167060595	167060873	167060623	167060637	-	0.000165
chr1	167060595	167060873	167060816	167060830	-	6.92e-05
chr3	152484256	152484555	152484368	152484382	+	0.000781
chr3	152484256	152484555	152484343	152484357	+	4.39e-07
chr3	152484256	152484555	152484280	152484294	+	0.000178
chr3	152484256	152484555	152484450	152484464	+	1.98e-05
chr3	152484256	152484555	152484443	152484457	-	0.000856
chr19	45888360	45888633	45888452	45888466	-	0.000344
chr19	45888360	45888633	45888367	45888381	+	0.000939
chr19	45888360	45888633	45888537	45888551	+	3.46e-05
chr19	45888360	45888633	45888525	45888539	+	0.000712
chr19	45888360	45888633	45888520	45888534	-	0.000405
chr2	180871731	180871978	180871827	180871841	+	8.57e-06
chr2	180871731	180871978	180871765	180871779	-	0.000159
chr2	180871731	180871978	180871763	180871777	-	0.000968
chr2	180871731	180871978	180871878	180871892	+	0.000171
chr2	180871731	180871978	180871861	180871875	-	0.000805
chr13	59847607	59847807	59847731	59847745	-	6.6e-05
chr13	59847607	59847807	59847686	59847700	-	0.000254
chr13	59847607	59847807	59847683	59847697	+	0.000592
chr13	59847607	59847807	59847712	59847726	-	0.000178
chr13	59847607	59847807	59847778	59847792	+	0.000229
chr8	58233054	58233317	58233100	58233114	-	0.000322
chr8	58233054	58233317	58233119	58233133	-	0.000322
chr8	58233054	58233317	58233173	58233187	-	6.58e-08
chr8	58233054	58233317	58233132	58233146	-	0.000998
chr8	58233054	58233317	58233261	58233275	-	0.000356
chr17	45703629	45704465	45703681	45703695	+	1.2e-05
chr17	45703629	45704465	45703655	45703669	+	0.000291
chr17	45703629	45704465	45703736	45703750	-	0.00049
chr17	45703629	45704465	45703949	45703963	+	0.000103
chr17	45703629	45704465	45703944	45703958	-	0.000312
chr11	96701678	96701954	96701912	96701926	-	0.000229
chr11	96701678	96701954	96701771	96701785	+	1.63e-06
chr11	96701678	96701954	96701710	96701724	+	0.000734
chr11	96701678	96701954	96701863	96701877	-	5.73e-05
chr11	96701678	96701954	96701892	96701906	-	0.000367
chr4	125225544	125225803	125225651	125225665	+	0.000282
chr4	125225544	125225803	125225610	125225624	+	3.82e-06
chr4	125225544	125225803	125225680	125225694	+	0.000939
chr4	125225544	125225803	125225782	125225796	-	0.000254
chr4	125225544	125225803	125225754	125225768	-	0.000221
chr5	126046357	126046580	126046561	126046575	+	0.000574
chr5	126046357	126046580	126046428	126046442	+	5.2e-05
chr5	126046357	126046580	126046440	126046454	+	0.000379
chr5	126046357	126046580	126046512	126046526	+	0.000136
chr5	126046357	126046580	126046522	126046536	-	1.2e-05
chr6	81765369	81765576	81765429	81765443	+	2.23e-05
chr6	81765369	81765576	81765392	81765406	-	0.000475
chr6	81765369	81765576	81765410	81765424	-	7.73e-08
chr6	81765369	81765576	81765460	81765474	+	8.28e-05
chr6	81765369	81765576	81765455	81765469	-	7.73e-08
chr11	95126753	95126952	95126845	95126859	-	9.21e-07
chr11	95126753	95126952	95126827	95126841	-	0.000229
chr11	95126753	95126952	95126770	95126784	+	0.000998
chr11	95126753	95126952	95126901	95126915	+	2.23e-05
chr11	95126753	95126952	95126930	95126944	-	0.000831
chr9	57457735	57457951	57457801	57457815	+	1.05e-05
chr9	57457735	57457951	57457882	57457896	+	0.000333
chr9	57457735	57457951	57457847	57457861	-	0.000712
chr9	57457735	57457951	57457820	57457834	+	0.000344
chr9	57457735	57457951	57457872	57457886	-	5.73e-05
chr2	26490783	26491433	26491346	26491360	+	0.000103
chr2	26490783	26491433	26491198	26491212	+	5.2e-05
chr2	26490783	26491433	26490986	26491000	+	0.00046
chr2	26490783	26491433	26490981	26490995	-	8.66e-05
chr2	26490783	26491433	26491339	26491353	-	0.000998
chr15	72469515	72469740	72469621	72469635	-	0.000856
chr15	72469515	72469740	72469599	72469613	-	2.11e-05
chr15	72469515	72469740	72469587	72469601	-	0.000831
chr15	72469515	72469740	72469527	72469541	+	0.000856
chr15	72469515	72469740	72469714	72469728	+	9.85e-05
chr18	82226941	82227104	82226942	82226956	+	0.000171
chr18	82226941	82227104	82226986	82227000	+	6.48e-06
chr18	82226941	82227104	82226956	82226970	+	0.000282
chr18	82226941	82227104	82226959	82226973	-	0.000757
chr18	82226941	82227104	82227052	82227066	-	0.000556
chr6	45010231	45010469	45010361	45010375	-	3.13e-08
chr6	45010231	45010469	45010313	45010327	-	0.000649
chr6	45010231	45010469	45010240	45010254	+	0.000831
chr6	45010231	45010469	45010396	45010410	+	0.000856
chr6	45010231	45010469	45010391	45010405	+	0.000333
chr7	146346234	146346470	146346238	146346252	-	0.00049
chr7	146346234	146346470	146346287	146346301	-	0.000781
chr7	146346234	146346470	146346246	146346260	-	0.000939
chr7	146346234	146346470	146346292	146346306	+	1.12e-06
chr7	146346234	146346470	146346368	146346382	+	8.28e-05
chr14	64536038	64536226	64536098	64536112	+	0.000165
chr14	64536038	64536226	64536093	64536107	-	7.73e-08
chr14	64536038	64536226	64536058	64536072	+	0.000116
chr14	64536038	64536226	64536115	64536129	+	5.2e-06
chr14	64536038	64536226	64536122	64536136	+	0.000136
chr18	25826573	25827018	25826745	25826759	+	0.000379
chr18	25826573	25827018	25826733	25826747	+	0.000153
chr18	25826573	25827018	25826831	25826845	+	0.000475
chr18	25826573	25827018	25826819	25826833	+	0.000649
chr19	42330325	42330774	42330539	42330553	-	6.01e-06
chr19	42330325	42330774	42330460	42330474	-	0.000322
chr19	42330325	42330774	42330343	42330357	+	0.000856
chr19	42330325	42330774	42330600	42330614	-	4.71e-05
chr2	132607193	132607814	132607644	132607658	+	2.78e-07
chr2	132607193	132607814	132607537	132607551	-	2.34e-06
chr2	132607193	132607814	132607747	132607761	-	0.000629
chr2	132607193	132607814	132607677	132607691	+	0.000712
chr4	136480472	136480827	136480645	136480659	-	8.57e-06
chr4	136480472	136480827	136480620	136480634	+	9.04e-05
chr4	136480472	136480827	136480615	136480629	-	3.25e-06
chr4	136480472	136480827	136480491	136480505	-	0.000574
chr17	35406967	35407344	35407038	35407052	-	4.35e-08
chr17	35406967	35407344	35407019	35407033	-	0.000153
chr17	35406967	35407344	35407102	35407116	-	1.73e-07
chr17	35406967	35407344	35407173	35407187	-	3.5e-07
chr11	114913579	114913938	114913744	114913758	+	2.95e-05
chr11	114913579	114913938	114913691	114913705	+	6.01e-05
chr11	114913579	114913938	114913627	114913641	-	0.000781
chr11	114913579	114913938	114913641	114913655	+	0.000506
chr4	124977790	124978139	124977961	124977975	-	7.58e-05
chr4	124977790	124978139	124977889	124977903	-	2.5e-05
chr4	124977790	124978139	124978118	124978132	-	0.000629
chr4	124977790	124978139	124978053	124978067	-	0.00049
chr2	28771574	28771968	28771791	28771805	-	1.03e-07
chr2	28771574	28771968	28771716	28771730	-	3.46e-05
chr2	28771574	28771968	28771722	28771736	-	0.000883
chr2	28771574	28771968	28771825	28771839	+	0.000446
chr7	135375313	135375676	135375363	135375377	+	0.000475
chr7	135375313	135375676	135375465	135375479	-	0.000998
chr7	135375313	135375676	135375416	135375430	+	6.58e-08
chr7	135375313	135375676	135375484	135375498	+	1.92e-07
chr9	20661590	20661995	20661716	20661730	+	0.000111
chr9	20661590	20661995	20661661	20661675	-	0.00061
chr9	20661590	20661995	20661760	20661774	+	5.6e-06
chr9	20661590	20661995	20661916	20661930	+	7.24e-05
chr7	145275620	145276071	145275814	145275828	-	0.000781
chr7	145275620	145276071	145275941	145275955	-	6.3e-05
chr7	145275620	145276071	145275894	145275908	-	0.000539
chr7	145275620	145276071	145275975	145275989	+	0.000367
chr17	34109643	34109988	34109738	34109752	+	6.58e-08
chr17	34109643	34109988	34109715	34109729	+	0.000418
chr17	34109643	34109988	34109822	34109836	+	0.000939
chr17	34109643	34109988	34109803	34109817	+	1.92e-07
chr8	121782451	121782928	121782489	121782503	-	0.000649
chr8	121782451	121782928	121782858	121782872	+	0.00061
chr8	121782451	121782928	121782820	121782834	+	0.000367
chr8	121782451	121782928	121782756	121782770	-	0.000539
chr4	126850766	126851166	126851073	126851087	-	0.000282
chr4	126850766	126851166	126850955	126850969	+	1.02e-06
chr4	126850766	126851166	126850907	126850921	+	1.46e-05
chr4	126850766	126851166	126850992	126851006	-	0.000805
chrX	71114711	71115059	71114875	71114889	+	6.92e-05
chrX	71114711	71115059	71114800	71114814	-	0.000556
chrX	71114711	71115059	71114845	71114859	+	8.28e-05
chrX	71114711	71115059	71115015	71115029	-	0.000418
chr2	136539899	136540250	136540117	136540131	-	0.000712
chr2	136539899	136540250	136540031	136540045	-	0.000206
chr2	136539899	136540250	136539962	136539976	-	0.000111
chr2	136539899	136540250	136540081	136540095	-	6.6e-05
chr4	154771671	154771985	154771822	154771836	-	0.000178
chr4	154771671	154771985	154771803	154771817	-	4.13e-06
chr4	154771671	154771985	154771725	154771739	-	0.000691
chr4	154771671	154771985	154771852	154771866	-	0.000574
chr8	121687993	121688336	121688190	121688204	-	0.000939
chr8	121687993	121688336	121688163	121688177	-	3.11e-07
chr8	121687993	121688336	121688292	121688306	+	0.000968
chr8	121687993	121688336	121688199	121688213	+	0.00091
chr4	147603839	147604145	147603942	147603956	+	0.000272
chr4	147603839	147604145	147603908	147603922	-	0.00061
chr4	147603839	147604145	147603981	147603995	+	0.000107
chr4	147603839	147604145	147604131	147604145	-	3.46e-05
chr5	150290895	150291422	150290966	150290980	+	1.37e-05
chr5	150290895	150291422	150291083	150291097	-	0.000432
chr5	150290895	150291422	150291231	150291245	-	1.28e-05
chr5	150290895	150291422	150291300	150291314	-	0.000734
chr5	137506035	137506355	137506339	137506353	+	3.29e-05
chr5	137506035	137506355	137506246	137506260	-	0.000191
chr5	137506035	137506355	137506143	137506157	+	2.38e-09
chr5	137506035	137506355	137506089	137506103	+	0.000322
chr2	167014371	167014761	167014571	167014585	+	6.01e-06
chr2	167014371	167014761	167014436	167014450	+	0.000171
chr2	167014371	167014761	167014504	167014518	-	0.000539
chr2	167014371	167014761	167014614	167014628	-	8.66e-05
chr5	117279804	117280159	117280097	117280111	-	1.05e-05
chr5	117279804	117280159	117279965	117279979	-	8.66e-05
chr5	117279804	117280159	117280033	117280047	-	0.000691
chr5	117279804	117280159	117280112	117280126	-	0.000691
chr14	37881755	37882090	37881968	37881982	+	0.000111
chr14	37881755	37882090	37881926	37881940	+	0.000883
chr14	37881755	37882090	37881906	37881920	-	1.12e-05
chr14	37881755	37882090	37882065	37882079	+	0.000556
chr12	25109917	25110215	25109996	25110010	+	4.91e-07
chr12	25109917	25110215	25110083	25110097	+	4.05e-05
chr12	25109917	25110215	25110054	25110068	+	9.44e-05
chr12	25109917	25110215	25110025	25110039	+	0.000178
chr8	112720669	112720987	112720878	112720892	-	0.000178
chr8	112720669	112720987	112720764	112720778	+	0.000446
chr8	112720669	112720987	112720796	112720810	+	2.5e-05
chr8	112720669	112720987	112720841	112720855	-	0.000831
chr19	6502664	6502983	6502714	6502728	+	0.000263
chr19	6502664	6502983	6502785	6502799	+	2.2e-07
chr19	6502664	6502983	6502754	6502768	+	0.000198
chr19	6502664	6502983	6502937	6502951	+	0.000432
chr12	16660347	16660679	16660571	16660585	+	0.000379
chr12	16660347	16660679	16660454	16660468	+	6.01e-05
chr12	16660347	16660679	16660400	16660414	+	1.37e-05
chr12	16660347	16660679	16660649	16660663	+	0.000968
chr6	125111133	125111780	125111646	125111660	+	0.000781
chr6	125111133	125111780	125111614	125111628	+	5.6e-06
chr6	125111133	125111780	125111692	125111706	+	8.66e-05
chr6	125111133	125111780	125111700	125111714	-	0.000432
chr3	88963132	88963469	88963266	88963280	-	8.28e-05
chr3	88963132	88963469	88963155	88963169	+	0.000198
chr3	88963132	88963469	88963166	88963180	+	0.000883
chr3	88963132	88963469	88963332	88963346	+	0.000506
chr11	54509521	54509845	54509734	54509748	+	0.000367
chr11	54509521	54509845	54509621	54509635	-	3.65e-05
chr11	54509521	54509845	54509609	54509623	-	0.000998
chr11	54509521	54509845	54509761	54509775	+	0.000116
chr11	107678506	107678903	107678722	107678736	-	3.12e-05
chr11	107678506	107678903	107678635	107678649	+	0.000883
chr11	107678506	107678903	107678541	107678555	-	0.000254
chr11	107678506	107678903	107678745	107678759	-	0.000141
chr1	74904716	74905018	74904825	74904839	+	0.000998
chr1	74904716	74905018	74904803	74904817	+	9.44e-05
chr1	74904716	74905018	74904787	74904801	-	0.000506
chr1	74904716	74905018	74904981	74904995	-	0.000153
chr8	124285485	124285788	124285578	124285592	+	1.24e-06
chr8	124285485	124285788	124285512	124285526	-	0.000103
chr8	124285485	124285788	124285622	124285636	-	0.000856
chr8	124285485	124285788	124285695	124285709	-	0.000198
chr8	9635319	9635620	9635414	9635428	+	0.000191
chr8	9635319	9635620	9635377	9635391	-	0.000805
chr8	9635319	9635620	9635402	9635416	+	9.44e-05
chr8	9635319	9635620	9635439	9635453	+	9.44e-05
chr15	79906546	79907504	79906717	79906731	+	0.000165
chr15	79906546	79907504	79906646	79906660	+	0.000998
chr15	79906546	79907504	79906756	79906770	+	2.23e-05
chr15	79906546	79907504	79907166	79907180	-	0.000856
chr18	37377862	37378172	37378103	37378117	-	0.000998
chr18	37377862	37378172	37377967	37377981	+	0.000475
chr18	37377862	37378172	37377973	37377987	+	6.6e-05
chr18	37377862	37378172	37378029	37378043	-	0.000757
chr12	56373347	56373667	56373409	56373423	+	7.96e-09
chr12	56373347	56373667	56373456	56373470	+	3.13e-08
chr12	56373347	56373667	56373417	56373431	-	8.66e-05
chr12	56373347	56373667	56373508	56373522	+	1.34e-07
chr2	91761370	91761688	91761580	91761594	+	0.000141
chr2	91761370	91761688	91761461	91761475	+	0.000968
chr2	91761370	91761688	91761489	91761503	+	6.3e-05
chr2	91761370	91761688	91761645	91761659	-	0.000539
chr10	127684468	127684791	127684775	127684789	+	0.000781
chr10	127684468	127684791	127684586	127684600	+	7.46e-06
chr10	127684468	127684791	127684685	127684699	-	0.000246
chr10	127684468	127684791	127684769	127684783	+	0.000831
chr2	143372579	143373114	143372720	143372734	-	0.000344
chr2	143372579	143373114	143372677	143372691	+	2.37e-05
chr2	143372579	143373114	143372954	143372968	+	4.26e-05
chr2	143372579	143373114	143373032	143373046	-	9.04e-05
chr4	138153771	138154068	138153842	138153856	-	0.000592
chr4	138153771	138154068	138153902	138153916	-	2.6e-08
chr4	138153771	138154068	138153887	138153901	+	0.000344
chr4	138153771	138154068	138154028	138154042	+	0.000432
chr5	37406752	37407176	37407016	37407030	-	1.79e-06
chr5	37406752	37407176	37406773	37406787	+	0.000229
chr5	37406752	37407176	37407038	37407052	+	0.000883
chr5	37406752	37407176	37407160	37407174	-	0.000629
chr8	77375797	77376089	77375887	77375901	-	3.25e-06
chr8	77375797	77376089	77375853	77375867	+	0.000805
chr8	77375797	77376089	77375913	77375927	-	1.73e-07
chr8	77375797	77376089	77376038	77376052	+	0.000198
chr11	74986463	74987200	74986802	74986816	+	0.000734
chr11	74986463	74987200	74986665	74986679	+	2.11e-05
chr11	74986463	74987200	74986580	74986594	+	0.000998
chr11	74986463	74987200	74987023	74987037	+	7.24e-05
chr10	129717116	129717438	129717220	129717234	-	0.000301
chr10	129717116	129717438	129717210	129717224	+	0.000556
chr10	129717116	129717438	129717321	129717335	+	0.000206
chr10	129717116	129717438	129717261	129717275	-	0.000103
chr4	125006087	125006402	125006245	125006259	-	4.13e-06
chr4	125006087	125006402	125006282	125006296	+	0.000556
chr4	125006087	125006402	125006260	125006274	+	0.000556
chr4	125006087	125006402	125006326	125006340	-	0.000506
chr8	119697677	119697945	119697780	119697794	+	3e-06
chr8	119697677	119697945	119697793	119697807	+	0.000831
chr8	119697677	119697945	119697796	119697810	-	0.000475
chr8	119697677	119697945	119697862	119697876	-	0.000254
chr13	42806964	42807278	42807091	42807105	+	6.95e-06
chr13	42806964	42807278	42807029	42807043	+	0.00049
chr13	42806964	42807278	42807057	42807071	-	0.000998
chr13	42806964	42807278	42807152	42807166	-	4.71e-05
chr13	54472958	54473282	54473106	54473120	-	5.2e-06
chr13	54472958	54473282	54473069	54473083	-	0.00091
chr13	54472958	54473282	54473199	54473213	-	0.000805
chr13	54472958	54473282	54473244	54473258	-	0.000856
chr7	130379018	130379290	130379217	130379231	+	0.000116
chr7	130379018	130379290	130379097	130379111	+	0.000506
chr7	130379018	130379290	130379047	130379061	-	0.000734
chr7	130379018	130379290	130379132	130379146	-	2.23e-05
chr6	33076604	33076936	33076682	33076696	-	0.000379
chr6	33076604	33076936	33076755	33076769	-	3.5e-07
chr6	33076604	33076936	33076687	33076701	+	0.000141
chr6	33076604	33076936	33076783	33076797	+	9.04e-05
chr8	72225725	72226009	72225757	72225771	+	0.000883
chr8	72225725	72226009	72225837	72225851	-	6.58e-08
chr8	72225725	72226009	72225966	72225980	-	0.000237
chr8	72225725	72226009	72225883	72225897	-	0.000998
chr4	116875079	116875530	116875187	116875201	-	0.000246
chr4	116875079	116875530	116875140	116875154	+	0.000379
chr4	116875079	116875530	116875456	116875470	+	0.000691
chr4	116875079	116875530	116875322	116875336	+	0.000805
chr10	60486279	60486584	60486485	60486499	-	0.000322
chr10	60486279	60486584	60486415	60486429	-	2.54e-06
chr10	60486279	60486584	60486351	60486365	-	2.37e-05
chr10	60486279	60486584	60486397	60486411	-	0.000213
chr5	129793385	129793711	129793475	129793489	+	0.000301
chr5	129793385	129793711	129793395	129793409	+	1.56e-05
chr5	129793385	129793711	129793446	129793460	-	0.000178
chr5	129793385	129793711	129793541	129793555	-	2.8e-05
chr1	134695906	134696208	134696041	134696055	-	1.36e-06
chr1	134695906	134696208	134695958	134695972	+	6.92e-05
chr1	134695906	134696208	134696137	134696151	-	0.000312
chr1	134695906	134696208	134696093	134696107	-	0.000691
chr14	50144827	50145157	50144881	50144895	+	0.000333
chr14	50144827	50145157	50144980	50144994	-	3.84e-05
chr14	50144827	50145157	50144916	50144930	+	0.000506
chr14	50144827	50145157	50145062	50145076	+	0.000781
chr5	23613546	23613874	23613734	23613748	-	8.98e-08
chr5	23613546	23613874	23613676	23613690	-	1.92e-07
chr5	23613546	23613874	23613585	23613599	-	0.000291
chr5	23613546	23613874	23613713	23613727	-	0.000522
chr14	30470278	30470594	30470403	30470417	-	0.000301
chr14	30470278	30470594	30470349	30470363	-	0.000367
chr14	30470278	30470594	30470388	30470402	+	1.56e-05
chr14	30470278	30470594	30470414	30470428	+	6.3e-05
chr2	92911915	92912219	92912171	92912185	-	0.000213
chr2	92911915	92912219	92911917	92911931	-	0.000968
chr2	92911915	92912219	92911996	92912010	+	6.01e-06
chr2	92911915	92912219	92912178	92912192	+	0.000856
chr11	80929261	80929530	80929271	80929285	+	0.000506
chr11	80929261	80929530	80929510	80929524	+	0.000691
chr11	80929261	80929530	80929362	80929376	+	1.05e-05
chr11	80929261	80929530	80929503	80929517	-	0.000356
chr2	164805340	164805630	164805449	164805463	-	9.2e-06
chr2	164805340	164805630	164805434	164805448	+	2.37e-05
chr2	164805340	164805630	164805376	164805390	-	0.000539
chr2	164805340	164805630	164805586	164805600	+	0.000229
chr5	129385085	129385369	129385196	129385210	+	1.12e-05
chr5	129385085	129385369	129385093	129385107	+	0.000191
chr5	129385085	129385369	129385236	129385250	+	0.000856
chr5	129385085	129385369	129385208	129385222	+	0.000475
chr18	42555818	42556110	42555901	42555915	-	0.000856
chr18	42555818	42556110	42555830	42555844	+	0.00049
chr18	42555818	42556110	42555825	42555839	-	0.000506
chr18	42555818	42556110	42555923	42555937	+	4.71e-05
chr15	80033878	80034172	80034001	80034015	-	3.65e-05
chr15	80033878	80034172	80034104	80034118	+	0.000734
chr15	80033878	80034172	80034055	80034069	+	0.000831
chr15	80033878	80034172	80034107	80034121	-	0.000781
chr2	33920675	33920964	33920793	33920807	+	1.92e-07
chr2	33920675	33920964	33920859	33920873	+	0.000883
chr2	33920675	33920964	33920805	33920819	+	0.000446
chr2	33920675	33920964	33920897	33920911	-	2.95e-05
chr5	28168132	28168458	28168174	28168188	-	0.000968
chr5	28168132	28168458	28168342	28168356	-	0.000121
chr5	28168132	28168458	28168233	28168247	-	0.000367
chr5	28168132	28168458	28168276	28168290	-	2.78e-07
chr6	128419537	128419842	128419636	128419650	-	0.000191
chr6	128419537	128419842	128419621	128419635	+	1.98e-05
chr6	128419537	128419842	128419800	128419814	+	0.000968
chr6	128419537	128419842	128419671	128419685	+	0.000159
chr7	19868375	19868693	19868501	19868515	+	1.36e-06
chr7	19868375	19868693	19868604	19868618	+	0.000574
chr7	19868375	19868693	19868519	19868533	+	0.000574
chr7	19868375	19868693	19868647	19868661	+	0.000344
chr10	39978299	39978729	39978329	39978343	-	0.000539
chr10	39978299	39978729	39978366	39978380	+	0.000856
chr10	39978299	39978729	39978459	39978473	-	0.000539
chr10	39978299	39978729	39978543	39978557	+	0.000691
chr19	3850975	3851296	3851124	3851138	-	0.000669
chr19	3850975	3851296	3851087	3851101	+	0.000649
chr19	3850975	3851296	3851249	3851263	-	0.000712
chr19	3850975	3851296	3851177	3851191	-	0.000506
chr5	37227289	37227542	37227412	37227426	-	0.000367
chr5	37227289	37227542	37227379	37227393	+	0.000153
chr5	37227289	37227542	37227316	37227330	-	0.000734
chr5	37227289	37227542	37227318	37227332	+	0.000856
chr18	77513026	77513318	77513183	77513197	-	0.000344
chr18	77513026	77513318	77513148	77513162	-	2.37e-05
chr18	77513026	77513318	77513136	77513150	-	0.000649
chr18	77513026	77513318	77513266	77513280	-	0.000121
chr17	65719490	65719775	65719575	65719589	+	1.36e-06
chr17	65719490	65719775	65719518	65719532	+	0.000998
chr17	65719490	65719775	65719619	65719633	-	0.000805
chr17	65719490	65719775	65719606	65719620	+	0.000136
chr11	103517928	103518185	103518022	103518036	-	7.24e-05
chr11	103517928	103518185	103517999	103518013	+	0.000153
chr11	103517928	103518185	103518032	103518046	+	5.2e-06
chr11	103517928	103518185	103518064	103518078	+	0.000379
chr19	23236860	23237313	23237178	23237192	-	0.000781
chr19	23236860	23237313	23237024	23237038	-	1.24e-06
chr19	23236860	23237313	23237154	23237168	+	0.000291
chr19	23236860	23237313	23237130	23237144	-	2.38e-09
chr11	104059287	104059581	104059296	104059310	+	0.000171
chr11	104059287	104059581	104059380	104059394	+	1.79e-06
chr11	104059287	104059581	104059395	104059409	-	4.05e-05
chr11	104059287	104059581	104059464	104059478	+	0.000475
chr16	5882027	5882302	5882143	5882157	+	2.2e-07
chr16	5882027	5882302	5882118	5882132	+	0.000165
chr16	5882027	5882302	5882057	5882071	+	0.000301
chr16	5882027	5882302	5882263	5882277	-	0.000556
chr4	41553896	41554197	41554059	41554073	+	0.000246
chr4	41553896	41554197	41554020	41554034	-	3.53e-06
chr4	41553896	41554197	41554053	41554067	+	0.000191
chr4	41553896	41554197	41554139	41554153	+	0.000574
chr7	126499851	126500124	126500097	126500111	+	0.000939
chr7	126499851	126500124	126499924	126499938	+	2.14e-06
chr7	126499851	126500124	126499941	126499955	+	2.34e-06
chr7	126499851	126500124	126499984	126499998	-	0.000592
chr8	127317170	127317486	127317470	127317484	-	0.000939
chr8	127317170	127317486	127317277	127317291	+	3.25e-06
chr8	127317170	127317486	127317204	127317218	-	0.000237
chr8	127317170	127317486	127317328	127317342	+	0.000333
chr14	71058766	71059049	71058836	71058850	+	1.19e-07
chr14	71058766	71059049	71058908	71058922	-	0.000116
chr14	71058766	71059049	71058846	71058860	-	0.000291
chr14	71058766	71059049	71058902	71058916	-	0.000282
chr11	81780317	81780591	81780489	81780503	+	0.00091
chr11	81780317	81780591	81780483	81780497	+	0.000939
chr11	81780317	81780591	81780426	81780440	-	5.2e-06
chr11	81780317	81780591	81780520	81780534	-	0.000184
chr2	178011971	178012214	178012069	178012083	+	1.65e-05
chr2	178011971	178012214	178012102	178012116	-	7.58e-05
chr2	178011971	178012214	178012128	178012142	+	0.00046
chr2	178011971	178012214	178012161	178012175	+	0.000165
chr12	88335252	88335508	88335378	88335392	+	6.01e-06
chr12	88335252	88335508	88335336	88335350	+	3.46e-05
chr12	88335252	88335508	88335271	88335285	+	0.000968
chr12	88335252	88335508	88335428	88335442	-	0.00049
chr6	115128940	115129181	115128981	115128995	+	0.000629
chr6	115128940	115129181	115129137	115129151	-	0.000669
chr6	115128940	115129181	115129025	115129039	-	1.02e-06
chr6	115128940	115129181	115129056	115129070	-	0.00049
chr18	35824412	35824706	35824512	35824526	-	8.98e-08
chr18	35824412	35824706	35824446	35824460	-	0.000165
chr18	35824412	35824706	35824493	35824507	-	0.000592
chr18	35824412	35824706	35824593	35824607	-	2.77e-06
chr4	91046243	91046549	91046500	91046514	+	5.73e-05
chr4	91046243	91046549	91046368	91046382	-	5.2e-06
chr4	91046243	91046549	91046387	91046401	-	0.000506
chr4	91046243	91046549	91046428	91046442	+	0.000939
chr7	106780907	106781129	106780985	106780999	+	1.02e-06
chr7	106780907	106781129	106780974	106780988	+	0.000939
chr7	106780907	106781129	106781010	106781024	+	8.02e-06
chr7	106780907	106781129	106781115	106781129	+	0.000178
chr7	120362893	120363253	120363065	120363079	+	3.53e-06
chr7	120362893	120363253	120362972	120362986	-	0.000392
chr7	120362893	120363253	120363002	120363016	+	0.000367
chr7	120362893	120363253	120363166	120363180	-	0.000592
chr4	151133309	151133598	151133568	151133582	+	0.000757
chr4	151133309	151133598	151133410	151133424	+	0.000165
chr4	151133309	151133598	151133398	151133412	+	0.000254
chr4	151133309	151133598	151133468	151133482	+	0.000506
chr17	69788615	69789048	69788733	69788747	+	0.000712
chr17	69788615	69789048	69788721	69788735	+	3e-06
chr17	69788615	69789048	69789011	69789025	-	0.000883
chr17	69788615	69789048	69789029	69789043	+	0.000757
chr12	30150158	30150419	30150257	30150271	+	0.000126
chr12	30150158	30150419	30150238	30150252	+	0.000734
chr12	30150158	30150419	30150223	30150237	-	1.28e-05
chr12	30150158	30150419	30150287	30150301	+	0.000883
chr7	27274603	27274887	27274767	27274781	+	2.8e-05
chr7	27274603	27274887	27274738	27274752	+	0.000121
chr7	27274603	27274887	27274680	27274694	+	4.91e-07
chr7	27274603	27274887	27274709	27274723	+	0.000246
chr5	145252233	145252512	145252482	145252496	-	0.000712
chr5	145252233	145252512	145252393	145252407	-	5.2e-06
chr5	145252233	145252512	145252362	145252376	-	6.92e-05
chr5	145252233	145252512	145252336	145252350	-	0.000805
chr9	65972362	65972634	65972609	65972623	-	0.000856
chr9	65972362	65972634	65972374	65972388	+	0.000939
chr9	65972362	65972634	65972452	65972466	+	2.65e-05
chr9	65972362	65972634	65972471	65972485	+	0.000856
chr2	167303666	167303934	167303795	167303809	+	0.000221
chr2	167303666	167303934	167303790	167303804	-	6.01e-06
chr2	167303666	167303934	167303673	167303687	+	0.000856
chr2	167303666	167303934	167303732	167303746	+	0.000939
chr9	118521394	118521662	118521592	118521606	+	0.000126
chr9	118521394	118521662	118521413	118521427	+	0.000405
chr9	118521394	118521662	118521563	118521577	-	0.000556
chr9	118521394	118521662	118521629	118521643	+	2.11e-05
chr11	87770683	87770944	87770763	87770777	+	0.00091
chr11	87770683	87770944	87770758	87770772	-	0.000333
chr11	87770683	87770944	87770741	87770755	+	0.000757
chr11	87770683	87770944	87770778	87770792	-	9.44e-05
chr10	93768369	93768622	93768536	93768550	+	0.000136
chr10	93768369	93768622	93768475	93768489	-	4.82e-06
chr10	93768369	93768622	93768440	93768454	+	6.95e-06
chr10	93768369	93768622	93768480	93768494	+	0.000883
chr18	25911317	25911621	25911365	25911379	-	0.000831
chr18	25911317	25911621	25911398	25911412	-	0.000669
chr18	25911317	25911621	25911439	25911453	-	3.53e-06
chr18	25911317	25911621	25911511	25911525	+	2.37e-05
chr18	32279675	32279984	32279820	32279834	-	8.98e-08
chr18	32279675	32279984	32279691	32279705	-	6.08e-07
chr18	32279675	32279984	32279705	32279719	-	5.2e-05
chr18	32279675	32279984	32279770	32279784	-	1.92e-07
chr15	99499490	99499723	99499588	99499602	-	5.05e-09
chr15	99499490	99499723	99499544	99499558	+	0.000574
chr15	99499490	99499723	99499593	99499607	+	0.000831
chr15	99499490	99499723	99499698	99499712	-	0.000246
chr4	147359366	147359655	147359440	147359454	-	0.000229
chr4	147359366	147359655	147359520	147359534	+	0.000272
chr4	147359366	147359655	147359491	147359505	-	1.28e-05
chr4	147359366	147359655	147359577	147359591	+	0.000254
chr11	59090461	59090732	59090621	59090635	-	0.000131
chr11	59090461	59090732	59090552	59090566	+	3.65e-05
chr11	59090461	59090732	59090518	59090532	-	0.000301
chr11	59090461	59090732	59090685	59090699	-	0.000206
chr9	94556741	94557026	94556876	94556890	-	6.58e-08
chr9	94556741	94557026	94556808	94556822	-	8.02e-06
chr9	94556741	94557026	94556822	94556836	-	0.000592
chr9	94556741	94557026	94557006	94557020	+	0.000221
chr19	7216635	7216888	7216733	7216747	-	7.46e-06
chr19	7216635	7216888	7216686	7216700	-	0.000392
chr19	7216635	7216888	7216691	7216705	-	0.000968
chr19	7216635	7216888	7216785	7216799	-	0.000254
chr12	112995012	112995256	112995054	112995068	-	0.000356
chr12	112995012	112995256	112995185	112995199	+	0.000556
chr12	112995012	112995256	112995105	112995119	+	0.000418
chr12	112995012	112995256	112995079	112995093	-	0.00046
chr8	88949371	88949591	88949488	88949502	+	2.37e-05
chr8	88949371	88949591	88949455	88949469	+	1.12e-06
chr8	88949371	88949591	88949474	88949488	-	6.6e-05
chr8	88949371	88949591	88949536	88949550	+	0.000757
chr5	27027772	27028031	27027862	27027876	+	0.000539
chr5	27027772	27028031	27027803	27027817	+	0.000629
chr5	27027772	27028031	27027821	27027835	+	0.000126
chr5	27027772	27028031	27027995	27028009	+	0.000206
chr9	40613361	40614177	40614109	40614123	+	0.000712
chr9	40613361	40614177	40613955	40613969	+	0.000968
chr9	40613361	40614177	40613832	40613846	+	0.000939
chr9	40613361	40614177	40613375	40613389	-	0.000691
chr11	92958417	92958692	92958522	92958536	+	0.000111
chr11	92958417	92958692	92958447	92958461	+	9.04e-05
chr11	92958417	92958692	92958494	92958508	+	0.000171
chr11	92958417	92958692	92958506	92958520	+	0.000344
chr3	94283545	94283830	94283622	94283636	+	0.000237
chr3	94283545	94283830	94283561	94283575	-	0.000649
chr3	94283545	94283830	94283633	94283647	+	0.000574
chr3	94283545	94283830	94283671	94283685	-	4.13e-06
chr6	91171217	91171446	91171417	91171431	-	0.000432
chr6	91171217	91171446	91171307	91171321	+	0.000165
chr6	91171217	91171446	91171295	91171309	+	0.000418
chr6	91171217	91171446	91171425	91171439	+	0.000237
chr19	35907583	35907806	35907677	35907691	+	2.77e-06
chr19	35907583	35907806	35907641	35907655	+	9.44e-05
chr19	35907583	35907806	35907713	35907727	+	0.000856
chr19	35907583	35907806	35907689	35907703	+	0.000446
chr9	105796113	105796430	105796251	105796265	-	0.000198
chr9	105796113	105796430	105796238	105796252	+	0.000883
chr9	105796113	105796430	105796195	105796209	+	0.00049
chr9	105796113	105796430	105796183	105796197	+	3e-06
chr15	84643904	84644177	84644001	84644015	+	7.93e-05
chr15	84643904	84644177	84644111	84644125	+	0.000405
chr15	84643904	84644177	84644052	84644066	+	0.000805
chr15	84643904	84644177	84644063	84644077	-	0.00091
chr15	98629969	98630207	98630025	98630039	-	0.000111
chr15	98629969	98630207	98629997	98630011	-	0.000246
chr15	98629969	98630207	98630085	98630099	-	5.47e-07
chr15	98629969	98630207	98630053	98630067	-	0.000254
chr18	77454139	77454391	77454244	77454258	-	9.64e-10
chr18	77454139	77454391	77454298	77454312	-	0.000111
chr18	77454139	77454391	77454264	77454278	+	2.23e-05
chr18	77454139	77454391	77454303	77454317	+	0.000939
chr7	6082038	6082340	6082040	6082054	+	0.000333
chr7	6082038	6082340	6082138	6082152	+	8.66e-05
chr7	6082038	6082340	6082099	6082113	-	0.000506
chr7	6082038	6082340	6082321	6082335	-	4.39e-07
chr14	124594622	124594880	124594745	124594759	-	0.000198
chr14	124594622	124594880	124594755	124594769	+	0.000379
chr14	124594622	124594880	124594758	124594772	-	0.000574
chr14	124594622	124594880	124594798	124594812	+	0.000883
chr14	64782447	64782699	64782656	64782670	-	0.000333
chr14	64782447	64782699	64782533	64782547	-	0.000379
chr14	64782447	64782699	64782651	64782665	-	0.000805
chr14	64782447	64782699	64782670	64782684	-	0.000392
chr2	127358192	127358434	127358327	127358341	-	0.000405
chr2	127358192	127358434	127358300	127358314	-	5.46e-05
chr2	127358192	127358434	127358386	127358400	-	2.11e-05
chr2	127358192	127358434	127358376	127358390	-	0.000229
chr11	121332236	121332457	121332350	121332364	-	0.000574
chr11	121332236	121332457	121332336	121332350	-	8.29e-07
chr11	121332236	121332457	121332256	121332270	-	1.24e-06
chr11	121332236	121332457	121332391	121332405	-	0.000153
chr10	87049559	87049812	87049596	87049610	+	0.000506
chr10	87049559	87049812	87049644	87049658	-	7.47e-07
chr10	87049559	87049812	87049632	87049646	-	0.00091
chr10	87049559	87049812	87049669	87049683	-	0.000805
chr1	101668869	101669152	101669021	101669035	+	0.000781
chr1	101668869	101669152	101668953	101668967	+	8.29e-07
chr1	101668869	101669152	101669096	101669110	-	9.04e-05
chr1	101668869	101669152	101669110	101669124	+	0.000432
chr15	62128780	62129058	62128888	62128902	-	6.92e-05
chr15	62128780	62129058	62128839	62128853	-	0.00061
chr15	62128780	62129058	62128983	62128997	+	7.24e-05
chr15	62128780	62129058	62128935	62128949	-	0.000111
chr19	42456163	42456380	42456300	42456314	+	0.000246
chr19	42456163	42456380	42456218	42456232	-	0.000432
chr19	42456163	42456380	42456234	42456248	+	1.12e-05
chr19	42456163	42456380	42456364	42456378	-	0.000734
chr17	28353800	28354051	28353879	28353893	-	0.00049
chr17	28353800	28354051	28353927	28353941	+	0.000171
chr17	28353800	28354051	28353908	28353922	+	3e-06
chr17	28353800	28354051	28353896	28353910	+	1.28e-05
chr8	122143538	122143744	122143635	122143649	+	0.000475
chr8	122143538	122143744	122143602	122143616	+	4.05e-05
chr8	122143538	122143744	122143544	122143558	-	0.000301
chr8	122143538	122143744	122143595	122143609	+	0.000939
chr4	48985364	48985585	48985417	48985431	-	2.77e-06
chr4	48985364	48985585	48985551	48985565	-	1.28e-05
chr4	48985364	48985585	48985431	48985445	-	6.74e-07
chr4	48985364	48985585	48985472	48985486	-	2.14e-06
chr10	83990452	83990716	83990601	83990615	+	0.000649
chr10	83990452	83990716	83990520	83990534	-	0.000939
chr10	83990452	83990716	83990562	83990576	-	1.61e-08
chr10	83990452	83990716	83990682	83990696	-	0.000147
chr14	38120939	38121148	38121081	38121095	+	1.12e-06
chr14	38120939	38121148	38121039	38121053	+	0.000522
chr14	38120939	38121148	38120961	38120975	-	0.000522
chr14	38120939	38121148	38121002	38121016	-	0.000418
chrX	72101526	72101841	72101595	72101609	+	5.6e-06
chrX	72101526	72101841	72101711	72101725	+	2.8e-05
chrX	72101526	72101841	72101682	72101696	+	8.66e-05
chrX	72101526	72101841	72101624	72101638	+	0.000178
chr15	48032177	48032464	48032360	48032374	-	6.6e-05
chr15	48032177	48032464	48032238	48032252	-	1.24e-06
chr15	48032177	48032464	48032224	48032238	-	0.000198
chr15	48032177	48032464	48032305	48032319	-	6.95e-06
chr16	97311057	97311326	97311133	97311147	+	8.29e-07
chr16	97311057	97311326	97311120	97311134	+	0.000712
chr16	97311057	97311326	97311273	97311287	-	5.73e-05
chr16	97311057	97311326	97311242	97311256	+	0.000998
chr16	95088193	95088459	95088309	95088323	-	2.2e-07
chr16	95088193	95088459	95088298	95088312	+	0.000379
chr16	95088193	95088459	95088332	95088346	-	1.37e-05
chr16	95088193	95088459	95088420	95088434	+	8.28e-05
chr17	27861330	27861618	27861390	27861404	-	0.000883
chr17	27861330	27861618	27861416	27861430	+	0.000522
chr17	27861330	27861618	27861460	27861474	-	1.76e-05
chr17	27861330	27861618	27861448	27861462	-	0.000116
chr11	89048175	89048443	89048223	89048237	-	0.000757
chr11	89048175	89048443	89048300	89048314	+	1.87e-05
chr11	89048175	89048443	89048262	89048276	+	1.24e-06
chr11	89048175	89048443	89048308	89048322	-	0.00091
chr8	66403928	66404204	66404132	66404146	-	0.000475
chr8	66403928	66404204	66404037	66404051	-	3.25e-06
chr8	66403928	66404204	66404064	66404078	+	0.000805
chr8	66403928	66404204	66404190	66404204	-	0.000968
chr16	68017939	68018231	68018079	68018093	-	0.000556
chr16	68017939	68018231	68018045	68018059	-	6.48e-06
chr16	68017939	68018231	68018050	68018064	+	5.2e-05
chr16	68017939	68018231	68018175	68018189	+	0.00091
chr18	75154478	75154748	75154732	75154746	-	6.01e-05
chr18	75154478	75154748	75154725	75154739	-	0.000221
chr18	75154478	75154748	75154506	75154520	+	0.000856
chr18	75154478	75154748	75154573	75154587	-	0.000883
chr3	67868727	67868976	67868847	67868861	+	5.73e-05
chr3	67868727	67868976	67868793	67868807	+	0.000691
chr3	67868727	67868976	67868862	67868876	-	0.000282
chr3	67868727	67868976	67868895	67868909	-	0.000522
chr1	154200880	154201085	154200893	154200907	+	0.000734
chr1	154200880	154201085	154200986	154201000	+	0.000805
chr1	154200880	154201085	154200981	154200995	-	3.82e-06
chr1	154200880	154201085	154201067	154201081	-	0.000506
chr5	34466876	34467097	34466905	34466919	-	0.000712
chr5	34466876	34467097	34466910	34466924	+	0.00091
chr5	34466876	34467097	34466963	34466977	-	0.000712
chr5	34466876	34467097	34467020	34467034	-	0.000968
chr3	117333341	117333550	117333432	117333446	-	0.000392
chr3	117333341	117333550	117333343	117333357	+	0.000198
chr3	117333341	117333550	117333425	117333439	-	0.000263
chr3	117333341	117333550	117333444	117333458	+	4.26e-05
chr9	122026100	122026319	122026283	122026297	+	0.000734
chr9	122026100	122026319	122026264	122026278	+	0.000998
chr9	122026100	122026319	122026184	122026198	+	8.29e-07
chr9	122026100	122026319	122026225	122026239	+	0.000734
chr7	150965465	150965733	150965557	150965571	+	8.57e-06
chr7	150965465	150965733	150965529	150965543	+	0.000506
chr7	150965465	150965733	150965583	150965597	+	2.8e-05
chr7	150965465	150965733	150965615	150965629	-	5.2e-06
chr10	115024467	115024716	115024513	115024527	-	0.000282
chr10	115024467	115024716	115024537	115024551	+	0.000126
chr10	115024467	115024716	115024648	115024662	+	0.000856
chr10	115024467	115024716	115024586	115024600	-	0.000968
chr2	27603076	27603263	27603230	27603244	+	0.000734
chr2	27603076	27603263	27603148	27603162	-	0.000184
chr2	27603076	27603263	27603080	27603094	+	0.000322
chr2	27603076	27603263	27603155	27603169	+	0.000522
chr17	34487470	34487687	34487593	34487607	+	0.000475
chr17	34487470	34487687	34487519	34487533	+	2.6e-08
chr17	34487470	34487687	34487574	34487588	+	1.92e-07
chr17	34487470	34487687	34487650	34487664	+	1.79e-06
chr12	111728073	111728428	111728104	111728118	+	4.05e-05
chr12	111728073	111728428	111728096	111728110	-	0.000574
chr12	111728073	111728428	111728324	111728338	-	0.000178
chr12	111728073	111728428	111728395	111728409	-	0.000237
chr9	49837258	49837478	49837341	49837355	-	8.28e-05
chr9	49837258	49837478	49837293	49837307	+	0.000418
chr9	49837258	49837478	49837397	49837411	-	0.000153
chr9	49837258	49837478	49837348	49837362	-	0.000221
chr4	98545486	98545673	98545525	98545539	+	0.000446
chr4	98545486	98545673	98545583	98545597	-	4.95e-05
chr4	98545486	98545673	98545550	98545564	+	0.000649
chr4	98545486	98545673	98545617	98545631	+	0.000968
chr13	70071664	70071888	70071682	70071696	-	1.37e-05
chr13	70071664	70071888	70071668	70071682	-	2.77e-06
chr13	70071664	70071888	70071748	70071762	-	4.82e-06
chr13	70071664	70071888	70071829	70071843	-	0.000367
chr8	113970073	113970283	113970256	113970270	+	0.000131
chr8	113970073	113970283	113970131	113970145	+	0.000757
chr8	113970073	113970283	113970091	113970105	+	0.000312
chr8	113970073	113970283	113970264	113970278	+	0.000178
chr8	121165859	121166072	121165882	121165896	-	3.25e-06
chr8	121165859	121166072	121165952	121165966	-	1.63e-06
chr8	121165859	121166072	121165917	121165931	-	2.14e-06
chr8	121165859	121166072	121165978	121165992	+	0.000221
chr10	86589731	86589952	86589840	86589854	+	0.000191
chr10	86589731	86589952	86589825	86589839	+	8.98e-08
chr10	86589731	86589952	86589802	86589816	+	0.000669
chr10	86589731	86589952	86589899	86589913	-	0.000312
chr14	64300375	64300771	64300463	64300477	-	3e-06
chr14	64300375	64300771	64300527	64300541	-	3e-06
chr14	64300375	64300771	64300592	64300606	-	3e-06
chr6	113802353	113802789	113802544	113802558	+	4.95e-05
chr6	113802353	113802789	113802457	113802471	+	2.77e-06
chr6	113802353	113802789	113802605	113802619	+	2.2e-07
chr4	130671224	130671581	130671331	130671345	+	8.66e-05
chr4	130671224	130671581	130671273	130671287	+	0.000165
chr4	130671224	130671581	130671374	130671388	+	3e-06
chr7	52025445	52025878	52025622	52025636	-	0.000131
chr7	52025445	52025878	52025572	52025586	-	9.2e-06
chr7	52025445	52025878	52025780	52025794	-	6.01e-05
chr5	33780857	33781225	33781175	33781189	+	0.000165
chr5	33780857	33781225	33780999	33781013	-	3.53e-06
chr5	33780857	33781225	33781055	33781069	-	0.000147
chr2	32873620	32873941	32873762	32873776	-	3.82e-06
chr2	32873620	32873941	32873741	32873755	-	1.12e-05
chr2	32873620	32873941	32873800	32873814	+	0.000781
chr4	139995807	139996265	139995924	139995938	+	0.000206
chr4	139995807	139996265	139995813	139995827	-	0.000379
chr4	139995807	139996265	139995985	139995999	+	3.53e-06
chr2	152857971	152858357	152858172	152858186	-	0.000107
chr2	152857971	152858357	152858136	152858150	-	1.28e-05
chr2	152857971	152858357	152858061	152858075	+	0.000998
chr4	127297157	127297484	127297306	127297320	-	8.57e-06
chr4	127297157	127297484	127297282	127297296	-	1.2e-05
chr4	127297157	127297484	127297197	127297211	-	0.000574
chr2	33946158	33946495	33946274	33946288	-	3.12e-05
chr2	33946158	33946495	33946467	33946481	-	0.000344
chr2	33946158	33946495	33946289	33946303	+	0.000649
chr8	73409541	73409887	73409730	73409744	+	0.000805
chr8	73409541	73409887	73409697	73409711	-	4.05e-05
chr8	73409541	73409887	73409851	73409865	+	0.000556
chr4	133576606	133576922	133576710	133576724	+	6.95e-06
chr4	133576606	133576922	133576740	133576754	+	5.46e-05
chr4	133576606	133576922	133576782	133576796	+	0.000141
chr2	38273533	38273886	38273681	38273695	-	0.000831
chr2	38273533	38273886	38273656	38273670	-	2.37e-05
chr2	38273533	38273886	38273686	38273700	+	2.78e-07
chr15	72520265	72520599	72520557	72520571	+	1.98e-05
chr15	72520265	72520599	72520409	72520423	+	6.92e-05
chr15	72520265	72520599	72520374	72520388	-	0.000539
chr2	172066593	172066921	172066701	172066715	+	8.29e-07
chr2	172066593	172066921	172066781	172066795	-	0.000221
chr2	172066593	172066921	172066735	172066749	+	9.64e-10
chr7	134598451	134598785	134598573	134598587	-	8.98e-08
chr7	134598451	134598785	134598697	134598711	-	0.000206
chr7	134598451	134598785	134598628	134598642	-	8.98e-08
chr4	32688161	32688486	32688360	32688374	+	0.000184
chr4	32688161	32688486	32688300	32688314	+	4.39e-07
chr4	32688161	32688486	32688365	32688379	-	0.000291
chr3	89568264	89568558	89568506	89568520	+	0.000392
chr3	89568264	89568558	89568375	89568389	+	2.11e-05
chr3	89568264	89568558	89568289	89568303	-	7.93e-05
chr7	133570839	133571236	133571018	133571032	+	8.98e-08
chr7	133570839	133571236	133570969	133570983	+	7.47e-07
chr7	133570839	133571236	133571083	133571097	+	1.02e-06
chr11	55624305	55624628	55624407	55624421	+	4.35e-08
chr11	55624305	55624628	55624376	55624390	+	0.000968
chr11	55624305	55624628	55624439	55624453	+	4.35e-08
chr8	124260176	124260472	124260307	124260321	-	3.53e-06
chr8	124260176	124260472	124260248	124260262	+	8.66e-05
chr8	124260176	124260472	124260440	124260454	+	5.46e-05
chr14	65165648	65165995	65165778	65165792	-	2.77e-06
chr14	65165648	65165995	65165824	65165838	-	1.76e-05
chr14	65165648	65165995	65165806	65165820	-	0.00091
chr19	5794679	5795444	5795074	5795088	+	0.000213
chr19	5794679	5795444	5794803	5794817	+	5.2e-05
chr19	5794679	5795444	5795033	5795047	+	0.000379
chr2	156478443	156478959	156478732	156478746	-	0.000432
chr2	156478443	156478959	156478527	156478541	-	4.35e-08
chr2	156478443	156478959	156478773	156478787	-	0.000254
chr8	108217607	108217901	108217622	108217636	+	0.000312
chr8	108217607	108217901	108217769	108217783	-	6.6e-05
chr8	108217607	108217901	108217886	108217900	+	0.000883
chr3	96116212	96116542	96116515	96116529	-	0.000191
chr3	96116212	96116542	96116376	96116390	+	0.000734
chr3	96116212	96116542	96116344	96116358	-	1.19e-07
chr11	11925779	11926115	11925902	11925916	-	1.19e-07
chr11	11925779	11926115	11925936	11925950	-	2.77e-06
chr11	11925779	11926115	11925952	11925966	-	1.24e-06
chr13	25360984	25361296	25361212	25361226	+	0.000506
chr13	25360984	25361296	25361151	25361165	+	0.00046
chr13	25360984	25361296	25361090	25361104	+	1.12e-06
chr17	28717337	28717695	28717530	28717544	+	6.01e-06
chr17	28717337	28717695	28717476	28717490	-	1.65e-05
chr17	28717337	28717695	28717627	28717641	-	0.00091
chr1	9288532	9288907	9288659	9288673	+	4.47e-06
chr1	9288532	9288907	9288593	9288607	-	1.65e-05
chr1	9288532	9288907	9288800	9288814	+	0.000229
chr11	80427088	80427388	80427219	80427233	-	3.13e-08
chr11	80427088	80427388	80427273	80427287	+	0.000556
chr11	80427088	80427388	80427268	80427282	-	5.46e-05
chr19	37313678	37313986	37313916	37313930	+	0.000432
chr19	37313678	37313986	37313811	37313825	+	0.000107
chr19	37313678	37313986	37313857	37313871	+	0.000629
chr6	122609651	122609951	122609692	122609706	-	0.000131
chr6	122609651	122609951	122609777	122609791	-	6.92e-05
chr6	122609651	122609951	122609719	122609733	+	0.000229
chr6	91789671	91789968	91789780	91789794	-	3.34e-09
chr6	91789671	91789968	91789885	91789899	+	0.00061
chr6	91789671	91789968	91789825	91789839	+	0.000712
chr7	52712131	52713036	52712222	52712236	+	0.000301
chr7	52712131	52713036	52712561	52712575	-	0.000781
chr7	52712131	52713036	52712463	52712477	-	4.48e-05
chr7	16714828	16715187	16714935	16714949	+	9.44e-05
chr7	16714828	16715187	16714925	16714939	+	0.000781
chr7	16714828	16715187	16715077	16715091	+	0.000344
chr9	61759403	61760128	61759774	61759788	-	3.74e-08
chr9	61759403	61760128	61759672	61759686	+	0.000282
chr9	61759403	61760128	61759847	61759861	-	3.12e-05
chr10	114621926	114622265	114622043	114622057	+	7.73e-08
chr10	114621926	114622265	114622124	114622138	-	8.66e-05
chr10	114621926	114622265	114622064	114622078	-	0.000446
chr6	119270565	119270884	119270774	119270788	+	0.000629
chr6	119270565	119270884	119270694	119270708	+	2.5e-05
chr6	119270565	119270884	119270793	119270807	-	9.83e-06
chr5	116995806	116996103	116995938	116995952	-	1.73e-07
chr5	116995806	116996103	116995817	116995831	-	6.3e-05
chr5	116995806	116996103	116996009	116996023	-	0.000131
chr8	125938201	125938530	125938300	125938314	+	0.000198
chr8	125938201	125938530	125938363	125938377	-	2.37e-05
chr8	125938201	125938530	125938351	125938365	-	0.00046
chr6	28932325	28932788	28932588	28932602	+	0.000405
chr6	28932325	28932788	28932383	28932397	-	0.000475
chr6	28932325	28932788	28932614	28932628	-	8.29e-07
chr5	137506913	137507283	137507070	137507084	+	0.000333
chr5	137506913	137507283	137507065	137507079	-	5.46e-05
chr5	137506913	137507283	137507097	137507111	+	0.000333
chr11	118788469	118788751	118788707	118788721	+	0.000322
chr11	118788469	118788751	118788562	118788576	+	2.8e-05
chr11	118788469	118788751	118788657	118788671	-	0.000213
chr9	49149189	49149539	49149434	49149448	+	1.65e-05
chr9	49149189	49149539	49149300	49149314	+	6.01e-05
chr9	49149189	49149539	49149326	49149340	+	0.000246
chr5	65858187	65858541	65858388	65858402	+	1.92e-07
chr5	65858187	65858541	65858307	65858321	+	8.29e-07
chr5	65858187	65858541	65858374	65858388	+	0.000301
chr5	116396002	116396302	116396131	116396145	-	7.73e-08
chr5	116396002	116396302	116396281	116396295	+	4.48e-05
chr5	116396002	116396302	116396196	116396210	+	0.000356
chr11	77302182	77302546	77302433	77302447	+	8.02e-06
chr11	77302182	77302546	77302327	77302341	-	1.37e-05
chr11	77302182	77302546	77302348	77302362	-	0.000734
chr9	43767685	43768017	43767985	43767999	-	0.000184
chr9	43767685	43768017	43767722	43767736	+	0.000649
chr9	43767685	43768017	43767817	43767831	+	8.98e-08
chr4	123994409	123994731	123994464	123994478	-	0.000649
chr4	123994409	123994731	123994521	123994535	+	1.19e-07
chr4	123994409	123994731	123994663	123994677	+	0.000522
chr5	110987417	110987705	110987554	110987568	-	2.6e-08
chr5	110987417	110987705	110987513	110987527	+	0.000147
chr5	110987417	110987705	110987619	110987633	+	0.000379
chr11	107781492	107781757	107781604	107781618	+	1.12e-06
chr11	107781492	107781757	107781599	107781613	-	6.01e-05
chr11	107781492	107781757	107781622	107781636	-	4.92e-08
chr2	29429151	29429453	29429353	29429367	-	0.000968
chr2	29429151	29429453	29429297	29429311	-	9.2e-06
chr2	29429151	29429453	29429177	29429191	+	0.000392
chr11	35612416	35612745	35612565	35612579	-	6.01e-06
chr11	35612416	35612745	35612513	35612527	-	0.000418
chr11	35612416	35612745	35612501	35612515	-	0.000506
chr5	37634672	37635006	37634735	37634749	-	0.000506
chr5	37634672	37635006	37634808	37634822	+	1.46e-05
chr5	37634672	37635006	37634867	37634881	+	0.000939
chr12	3806292	3806700	3806323	3806337	+	0.000831
chr12	3806292	3806700	3806545	3806559	+	1.76e-05
chr12	3806292	3806700	3806387	3806401	+	6.6e-05
chr7	26091408	26091718	26091536	26091550	-	1.05e-05
chr7	26091408	26091718	26091506	26091520	-	0.000539
chr7	26091408	26091718	26091451	26091465	+	0.000831
chr6	48086914	48087220	48087135	48087149	-	0.00091
chr6	48086914	48087220	48087000	48087014	-	0.000998
chr6	48086914	48087220	48087048	48087062	-	8.98e-08
chr7	31269314	31269668	31269405	31269419	+	2.37e-05
chr7	31269314	31269668	31269560	31269574	+	0.000392
chr7	31269314	31269668	31269439	31269453	+	3.82e-06
chr4	124537786	124538078	124537848	124537862	-	3.84e-05
chr4	124537786	124538078	124538028	124538042	-	0.00061
chr4	124537786	124538078	124537885	124537899	+	9.21e-07
chr11	78309440	78309798	78309655	78309669	+	0.000629
chr11	78309440	78309798	78309494	78309508	+	0.000379
chr11	78309440	78309798	78309581	78309595	+	0.000159
chr4	153281714	153282043	153281920	153281934	-	0.000153
chr4	153281714	153282043	153281739	153281753	-	1.98e-05
chr4	153281714	153282043	153281902	153281916	-	6.48e-06
chr5	117041408	117041705	117041563	117041577	+	9.83e-06
chr5	117041408	117041705	117041417	117041431	+	0.000322
chr5	117041408	117041705	117041503	117041517	+	8.02e-06
chr15	76352570	76352836	76352721	76352735	-	0.000539
chr15	76352570	76352836	76352709	76352723	-	0.000968
chr15	76352570	76352836	76352755	76352769	-	0.000805
chr10	3557521	3557862	3557592	3557606	-	0.000574
chr10	3557521	3557862	3557654	3557668	+	7.46e-06
chr10	3557521	3557862	3557808	3557822	-	0.000629
chr19	45172432	45172754	45172504	45172518	-	0.000939
chr19	45172432	45172754	45172528	45172542	+	2.5e-05
chr19	45172432	45172754	45172681	45172695	+	0.000107
chr9	74716228	74716527	74716360	74716374	-	3.5e-07
chr9	74716228	74716527	74716312	74716326	+	0.000712
chr9	74716228	74716527	74716397	74716411	+	5.46e-05
chr7	51849246	51849564	51849530	51849544	+	0.00049
chr7	51849246	51849564	51849356	51849370	+	2.6e-08
chr7	51849246	51849564	51849462	51849476	+	0.00091
chr7	51879130	51879454	51879228	51879242	+	6.74e-07
chr7	51879130	51879454	51879287	51879301	-	0.000392
chr7	51879130	51879454	51879295	51879309	-	0.000574
chr11	40414072	40414477	40414416	40414430	+	0.000116
chr11	40414072	40414477	40414179	40414193	+	1.98e-05
chr11	40414072	40414477	40414255	40414269	+	0.000998
chr1	117581179	117581519	117581447	117581461	-	9.04e-05
chr1	117581179	117581519	117581289	117581303	+	1.56e-05
chr1	117581179	117581519	117581371	117581385	+	0.00049
chr19	38602057	38602367	38602109	38602123	-	0.000669
chr19	38602057	38602367	38602216	38602230	+	6.01e-05
chr19	38602057	38602367	38602180	38602194	+	0.000221
chrX	7372227	7372540	7372314	7372328	-	4.71e-05
chrX	7372227	7372540	7372235	7372249	-	0.000356
chrX	7372227	7372540	7372335	7372349	+	4.71e-05
chr16	20765460	20765773	20765645	20765659	-	0.000831
chr16	20765460	20765773	20765578	20765592	+	0.000649
chr16	20765460	20765773	20765591	20765605	-	1.03e-07
chr17	73396412	73396692	73396439	73396453	-	0.000237
chr17	73396412	73396692	73396520	73396534	-	6.3e-05
chr17	73396412	73396692	73396471	73396485	-	0.000367
chr11	107547660	107547953	107547790	107547804	-	0.000237
chr11	107547660	107547953	107547677	107547691	+	0.000629
chr11	107547660	107547953	107547750	107547764	+	0.000126
chr16	10501983	10502285	10502107	10502121	-	2.6e-08
chr16	10501983	10502285	10502023	10502037	+	0.000191
chr16	10501983	10502285	10502134	10502148	+	0.000856
chr9	21212528	21212841	21212638	21212652	+	2.65e-05
chr9	21212528	21212841	21212533	21212547	-	0.000263
chr9	21212528	21212841	21212797	21212811	-	0.000757
chr5	136319380	136319687	136319472	136319486	+	0.000131
chr5	136319380	136319687	136319610	136319624	-	0.000574
chr5	136319380	136319687	136319626	136319640	+	0.000939
chr9	56586150	56586471	56586302	56586316	-	0.000147
chr9	56586150	56586471	56586254	56586268	+	5.2e-06
chr9	56586150	56586471	56586424	56586438	-	0.000282
chr15	76552641	76552950	76552771	76552785	-	0.000322
chr15	76552641	76552950	76552756	76552770	-	0.000254
chr15	76552641	76552950	76552789	76552803	-	2.2e-07
chr7	4571649	4571956	4571829	4571843	-	0.000539
chr7	4571649	4571956	4571770	4571784	+	3.82e-06
chr7	4571649	4571956	4571926	4571940	-	0.00049
chr11	119636490	119636782	119636580	119636594	+	6.48e-06
chr11	119636490	119636782	119636502	119636516	+	0.000539
chr11	119636490	119636782	119636754	119636768	-	7.58e-05
chr7	31131706	31132013	31131895	31131909	+	0.000506
chr7	31131706	31132013	31131818	31131832	+	0.000539
chr7	31131706	31132013	31131833	31131847	-	0.000121
chr8	80955354	80955633	80955544	80955558	-	0.000418
chr8	80955354	80955633	80955451	80955465	+	0.000629
chr8	80955354	80955633	80955496	80955510	+	0.000856
chr5	25107095	25107471	25107301	25107315	+	0.00091
chr5	25107095	25107471	25107255	25107269	-	0.000184
chr5	25107095	25107471	25107226	25107240	+	2.11e-05
chr4	124555218	124555513	124555246	124555260	-	0.000111
chr4	124555218	124555513	124555347	124555361	-	6.48e-06
chr4	124555218	124555513	124555318	124555332	+	0.00091
chr9	119058801	119059093	119058918	119058932	-	6.95e-06
chr9	119058801	119059093	119058840	119058854	-	0.000121
chr9	119058801	119059093	119059075	119059089	+	0.000506
chr6	31257058	31257382	31257284	31257298	-	0.000998
chr6	31257058	31257382	31257216	31257230	-	2.65e-05
chr6	31257058	31257382	31257079	31257093	+	4.95e-05
chr13	111070163	111070555	111070252	111070266	-	5.46e-05
chr13	111070163	111070555	111070358	111070372	+	4.71e-05
chr13	111070163	111070555	111070530	111070544	-	0.00049
chr1	3660775	3661096	3660904	3660918	+	1.96e-06
chr1	3660775	3661096	3660844	3660858	+	0.000939
chr1	3660775	3661096	3661008	3661022	+	0.000805
chr7	91233574	91233891	91233677	91233691	+	2.6e-08
chr7	91233574	91233891	91233798	91233812	-	0.000432
chr7	91233574	91233891	91233749	91233763	+	0.000198
chr4	152731714	152732009	152731830	152731844	-	3.65e-05
chr4	152731714	152732009	152731815	152731829	+	0.000356
chr4	152731714	152732009	152731854	152731868	+	0.000574
chr15	74379894	74380194	74380035	74380049	-	4.26e-05
chr15	74379894	74380194	74380007	74380021	+	0.00091
chr15	74379894	74380194	74380108	74380122	-	0.000392
chr12	110232985	110233274	110233068	110233082	+	1.63e-06
chr12	110232985	110233274	110233034	110233048	-	0.000556
chr12	110232985	110233274	110233136	110233150	+	0.000691
chr9	107284074	107284383	107284195	107284209	+	0.000213
chr9	107284074	107284383	107284213	107284227	-	3.65e-05
chr9	107284074	107284383	107284360	107284374	+	0.000669
chr5	37523163	37523486	37523266	37523280	+	5.2e-05
chr5	37523163	37523486	37523212	37523226	-	1.28e-05
chr5	37523163	37523486	37523360	37523374	-	0.000968
chr7	3218572	3219787	3219083	3219097	+	0.00049
chr7	3218572	3219787	3219524	3219538	-	0.000379
chr7	3218572	3219787	3219506	3219520	+	0.000418
chr7	128873800	128874129	128873925	128873939	+	1.36e-06
chr7	128873800	128874129	128874097	128874111	-	0.000392
chr7	128873800	128874129	128874000	128874014	+	0.00091
chr5	114003335	114003634	114003540	114003554	+	0.000629
chr5	114003335	114003634	114003467	114003481	-	4.13e-06
chr5	114003335	114003634	114003575	114003589	+	0.00091
chr4	119857301	119857586	119857506	119857520	+	0.00049
chr4	119857301	119857586	119857399	119857413	+	0.000184
chr4	119857301	119857586	119857315	119857329	+	0.000998
chr8	125261069	125261341	125261159	125261173	+	6.92e-05
chr8	125261069	125261341	125261201	125261215	+	0.000291
chr8	125261069	125261341	125261226	125261240	+	0.000691
chr4	137232065	137232360	137232087	137232101	+	0.000446
chr4	137232065	137232360	137232160	137232174	+	2.14e-06
chr4	137232065	137232360	137232175	137232189	-	1.65e-05
chr5	147172074	147172326	147172149	147172163	+	6.48e-06
chr5	147172074	147172326	147172119	147172133	-	0.000691
chr5	147172074	147172326	147172285	147172299	+	0.000392
chr1	63661125	63661548	63661380	63661394	-	3.25e-06
chr1	63661125	63661548	63661166	63661180	+	0.000805
chr1	63661125	63661548	63661135	63661149	-	0.000939
chr5	35642342	35642653	35642487	35642501	+	0.000367
chr5	35642342	35642653	35642347	35642361	-	0.000213
chr5	35642342	35642653	35642450	35642464	+	2.2e-07
chr7	108567940	108568239	108568222	108568236	+	0.000198
chr7	108567940	108568239	108568067	108568081	-	1.12e-05
chr7	108567940	108568239	108568205	108568219	+	6.01e-05
chr8	24085764	24086063	24085899	24085913	-	9.85e-05
chr8	24085764	24086063	24086045	24086059	+	0.000116
chr8	24085764	24086063	24086018	24086032	-	0.00091
chr4	41493004	41493369	41493137	41493151	+	1.02e-06
chr4	41493004	41493369	41493020	41493034	-	0.000574
chr4	41493004	41493369	41493185	41493199	+	0.000272
chr4	139914065	139914367	139914215	139914229	-	3e-06
chr4	139914065	139914367	139914148	139914162	-	0.000237
chr4	139914065	139914367	139914260	139914274	-	1.12e-05
chr1	91678426	91678759	91678625	91678639	-	3.84e-05
chr1	91678426	91678759	91678459	91678473	+	0.000379
chr1	91678426	91678759	91678607	91678621	-	0.00046
chr18	25658995	25659316	25659139	25659153	+	7.46e-06
chr18	25658995	25659316	25659009	25659023	-	0.000312
chr18	25658995	25659316	25659125	25659139	+	3.13e-08
chr15	81910397	81910673	81910514	81910528	-	7.73e-08
chr15	81910397	81910673	81910463	81910477	+	0.000322
chr15	81910397	81910673	81910620	81910634	-	1.65e-05
chr4	41479521	41479872	41479677	41479691	-	0.000171
chr4	41479521	41479872	41479654	41479668	-	0.000805
chr4	41479521	41479872	41479662	41479676	+	5.46e-05
chr15	88155651	88155942	88155842	88155856	-	0.000153
chr15	88155651	88155942	88155748	88155762	+	3.12e-05
chr15	88155651	88155942	88155768	88155782	-	0.000263
chr11	117734276	117734561	117734403	117734417	+	0.00091
chr11	117734276	117734561	117734324	117734338	+	7.93e-05
chr11	117734276	117734561	117734422	117734436	-	3.65e-05
chr7	87522644	87522947	87522760	87522774	+	7.96e-09
chr7	87522644	87522947	87522703	87522717	-	0.000103
chr7	87522644	87522947	87522873	87522887	+	0.000522
chr15	99527814	99528145	99528006	99528020	-	0.000229
chr15	99527814	99528145	99527939	99527953	+	6.58e-08
chr15	99527814	99528145	99527829	99527843	-	0.000691
chr8	9769115	9769440	9769182	9769196	+	0.000446
chr8	9769115	9769440	9769153	9769167	-	0.000649
chr8	9769115	9769440	9769267	9769281	-	3.12e-05
chr5	117164364	117164650	117164452	117164466	+	8.57e-06
chr5	117164364	117164650	117164621	117164635	+	0.000432
chr5	117164364	117164650	117164518	117164532	-	0.00061
chr19	42499809	42500119	42499918	42499932	+	0.000805
chr19	42499809	42500119	42499900	42499914	+	3.25e-06
chr19	42499809	42500119	42499970	42499984	-	0.000883
chr2	181499397	181499903	181499456	181499470	-	0.000669
chr2	181499397	181499903	181499504	181499518	+	6.74e-07
chr2	181499397	181499903	181499737	181499751	+	0.000556
chr5	136716302	136716603	136716341	136716355	-	0.000178
chr5	136716302	136716603	136716439	136716453	+	0.000998
chr5	136716302	136716603	136716434	136716448	-	9.64e-10
chr13	13877339	13877755	13877405	13877419	-	0.000506
chr13	13877339	13877755	13877390	13877404	+	0.000939
chr13	13877339	13877755	13877477	13877491	+	0.000221
chr18	81357700	81358009	81357825	81357839	-	2.37e-05
chr18	81357700	81358009	81357715	81357729	-	0.000237
chr18	81357700	81358009	81357868	81357882	-	0.000159
chr17	91492101	91492429	91492192	91492206	+	1.79e-06
chr17	91492101	91492429	91492241	91492255	-	9.83e-06
chr17	91492101	91492429	91492224	91492238	+	0.000272
chr11	79407069	79407369	79407211	79407225	-	0.000405
chr11	79407069	79407369	79407157	79407171	+	6.74e-07
chr11	79407069	79407369	79407225	79407239	+	8.28e-05
chr12	32244425	32244715	32244645	32244659	-	0.000322
chr12	32244425	32244715	32244510	32244524	+	9.83e-06
chr12	32244425	32244715	32244437	32244451	+	0.000883
chr4	138615597	138615882	138615712	138615726	-	0.000968
chr4	138615597	138615882	138615724	138615738	-	1.37e-05
chr4	138615597	138615882	138615743	138615757	-	0.000322
chr16	95194196	95194488	95194273	95194287	+	0.000367
chr16	95194196	95194488	95194353	95194367	+	0.000592
chr16	95194196	95194488	95194446	95194460	+	0.000734
chr6	89020045	89020333	89020151	89020165	-	0.000184
chr6	89020045	89020333	89020137	89020151	-	8.66e-05
chr6	89020045	89020333	89020163	89020177	-	5.6e-06
chr5	124598422	124598690	124598569	124598583	-	8.66e-05
chr5	124598422	124598690	124598494	124598508	+	1.2e-05
chr5	124598422	124598690	124598450	124598464	-	0.000405
chr14	13334539	13334854	13334656	13334670	-	9.21e-07
chr14	13334539	13334854	13334574	13334588	+	0.000556
chr14	13334539	13334854	13334720	13334734	-	6.6e-05
chr6	119183153	119183436	119183256	119183270	-	6.48e-06
chr6	119183153	119183436	119183353	119183367	-	0.000522
chr6	119183153	119183436	119183371	119183385	-	0.000939
chr9	27115708	27115999	27115849	27115863	-	0.000805
chr9	27115708	27115999	27115829	27115843	+	9.2e-06
chr9	27115708	27115999	27115841	27115855	+	0.000805
chr19	42711198	42711477	42711418	42711432	-	6.3e-05
chr19	42711198	42711477	42711310	42711324	-	4.39e-07
chr19	42711198	42711477	42711238	42711252	-	0.000805
chr12	82877231	82877515	82877339	82877353	-	4.82e-06
chr12	82877231	82877515	82877359	82877373	+	5.47e-07
chr12	82877231	82877515	82877487	82877501	-	0.000856
chr11	81007467	81007719	81007666	81007680	+	0.000649
chr11	81007467	81007719	81007553	81007567	+	0.000344
chr11	81007467	81007719	81007689	81007703	+	0.000883
chr11	72307576	72307873	72307758	72307772	+	0.000432
chr11	72307576	72307873	72307713	72307727	-	0.000178
chr11	72307576	72307873	72307785	72307799	-	0.000831
chr11	118546840	118547112	118546934	118546948	+	2.77e-06
chr11	118546840	118547112	118547024	118547038	-	0.000291
chr11	118546840	118547112	118546994	118547008	-	0.000734
chr10	90847094	90847388	90847107	90847121	+	0.000712
chr10	90847094	90847388	90847209	90847223	+	2.47e-07
chr10	90847094	90847388	90847146	90847160	+	0.000272
chr1	161632270	161632532	161632357	161632371	+	1.24e-06
chr1	161632270	161632532	161632303	161632317	-	0.000367
chr1	161632270	161632532	161632468	161632482	-	0.000405
chr6	88927094	88927350	88927110	88927124	+	0.000522
chr6	88927094	88927350	88927189	88927203	+	1.2e-05
chr6	88927094	88927350	88927283	88927297	+	0.000831
chr13	73040113	73040375	73040197	73040211	+	1.36e-06
chr13	73040113	73040375	73040237	73040251	+	0.000103
chr13	73040113	73040375	73040307	73040321	-	0.00091
chr11	32618543	32618816	32618636	32618650	+	3.53e-06
chr11	32618543	32618816	32618628	32618642	-	9.85e-05
chr11	32618543	32618816	32618648	32618662	+	1.96e-06
chr15	92726332	92726635	92726587	92726601	-	0.000968
chr15	92726332	92726635	92726457	92726471	-	7.96e-09
chr15	92726332	92726635	92726571	92726585	-	0.000669
chr5	29281637	29281947	29281803	29281817	+	0.000539
chr5	29281637	29281947	29281763	29281777	-	9.21e-07
chr5	29281637	29281947	29281720	29281734	+	0.000734
chr2	146052315	146052631	146052461	146052475	-	4.05e-05
chr2	146052315	146052631	146052594	146052608	-	7.24e-05
chr2	146052315	146052631	146052530	146052544	-	0.000856
chr7	64847612	64847931	64847722	64847736	+	1.49e-06
chr7	64847612	64847931	64847623	64847637	-	0.000392
chr7	64847612	64847931	64847849	64847863	-	0.000831
chr5	121518800	121519074	121518821	121518835	-	2.34e-06
chr5	121518800	121519074	121518899	121518913	-	3.84e-05
chr5	121518800	121519074	121518850	121518864	+	0.000165
chr1	74903805	74904051	74903869	74903883	-	0.000856
chr1	74903805	74904051	74903826	74903840	+	0.00091
chr1	74903805	74904051	74903902	74903916	+	0.000781
chr18	16965280	16965592	16965520	16965534	+	0.000178
chr18	16965280	16965592	16965425	16965439	-	4.26e-05
chr18	16965280	16965592	16965571	16965585	-	6.3e-05
chr15	83939412	83939707	83939507	83939521	-	0.000539
chr15	83939412	83939707	83939528	83939542	+	2.14e-06
chr15	83939412	83939707	83939513	83939527	-	0.000757
chr14	33280837	33281131	33280967	33280981	+	2.8e-05
chr14	33280837	33281131	33280931	33280945	-	0.000669
chr14	33280837	33281131	33281077	33281091	+	0.000757
chr11	32789365	32789636	32789491	32789505	-	8.29e-07
chr11	32789365	32789636	32789432	32789446	-	0.000246
chr11	32789365	32789636	32789380	32789394	-	0.000883
chr16	23890306	23890621	23890452	23890466	-	0.000116
chr16	23890306	23890621	23890425	23890439	-	0.000781
chr16	23890306	23890621	23890369	23890383	-	0.000939
chr15	83916821	83917172	83916957	83916971	-	5.6e-06
chr15	83916821	83917172	83916824	83916838	-	0.000291
chr15	83916821	83917172	83916974	83916988	-	1.73e-07
chr6	90802472	90802758	90802570	90802584	+	2.34e-06
chr6	90802472	90802758	90802543	90802557	-	0.000131
chr6	90802472	90802758	90802602	90802616	-	0.000153
chr11	51657472	51657756	51657596	51657610	+	8.28e-05
chr11	51657472	51657756	51657474	51657488	+	0.000405
chr11	51657472	51657756	51657653	51657667	-	0.000856
chr10	60405840	60406167	60405913	60405927	+	0.000649
chr10	60405840	60406167	60406013	60406027	-	1.28e-05
chr10	60405840	60406167	60406001	60406015	-	0.000184
chr11	50706047	50706332	50706276	50706290	-	0.000322
chr11	50706047	50706332	50706133	50706147	+	1.28e-05
chr11	50706047	50706332	50706230	50706244	-	0.000734
chr1	19099808	19100110	19100064	19100078	-	0.000856
chr1	19099808	19100110	19099933	19099947	-	1.96e-06
chr1	19099808	19100110	19099980	19099994	+	8.28e-05
chr11	80819442	80819712	80819530	80819544	+	0.000107
chr11	80819442	80819712	80819518	80819532	+	1.2e-05
chr11	80819442	80819712	80819660	80819674	+	0.000781
chr13	111038787	111039089	111038946	111038960	-	0.000506
chr13	111038787	111039089	111038901	111038915	+	1.49e-06
chr13	111038787	111039089	111038885	111038899	+	0.000272
chr1	129393423	129393716	129393519	129393533	-	0.000263
chr1	129393423	129393716	129393507	129393521	-	0.000691
chr1	129393423	129393716	129393534	129393548	+	0.000781
chr6	113912860	113913116	113913088	113913102	+	3.84e-05
chr6	113912860	113913116	113912988	113913002	-	6.01e-06
chr6	113912860	113913116	113912976	113912990	-	0.000883
chr18	37251573	37251876	37251634	37251648	-	0.000165
chr18	37251573	37251876	37251712	37251726	-	0.000322
chr18	37251573	37251876	37251723	37251737	+	0.000556
chr2	31780352	31780617	31780357	31780371	+	5.73e-05
chr2	31780352	31780617	31780474	31780488	-	0.000213
chr2	31780352	31780617	31780459	31780473	+	6.01e-05
chr8	23105758	23106066	23105913	23105927	-	3.12e-05
chr8	23105758	23106066	23105842	23105856	+	5.6e-06
chr8	23105758	23106066	23105941	23105955	+	0.000831
chr5	135020789	135021058	135020904	135020918	-	3.82e-06
chr5	135020789	135021058	135020840	135020854	-	0.000103
chr5	135020789	135021058	135020979	135020993	-	0.000856
chr5	148883448	148883713	148883587	148883601	-	1.28e-05
chr5	148883448	148883713	148883575	148883589	-	0.000367
chr5	148883448	148883713	148883546	148883560	+	0.000418
chr17	73837334	73837606	73837371	73837385	-	0.000301
chr17	73837334	73837606	73837475	73837489	-	4.71e-05
chr17	73837334	73837606	73837425	73837439	+	1.65e-05
chr15	83813003	83813274	83813056	83813070	-	0.000221
chr15	83813003	83813274	83813158	83813172	-	7.73e-08
chr15	83813003	83813274	83813135	83813149	+	0.000312
chr14	80169556	80169831	80169680	80169694	+	8.66e-05
chr14	80169556	80169831	80169668	80169682	+	0.000282
chr14	80169556	80169831	80169683	80169697	-	0.000592
chr5	127672316	127672605	127672520	127672534	+	0.000322
chr5	127672316	127672605	127672447	127672461	-	4.39e-07
chr5	127672316	127672605	127672376	127672390	+	0.000592
chr16	21937121	21937390	21937216	21937230	-	0.000367
chr16	21937121	21937390	21937280	21937294	-	0.000781
chr16	21937121	21937390	21937250	21937264	-	1.09e-08
chr4	153445164	153445408	153445268	153445282	+	2.34e-06
chr4	153445164	153445408	153445189	153445203	-	0.000312
chr4	153445164	153445408	153445179	153445193	-	0.000669
chr8	12451885	12452162	12452136	12452150	+	0.000757
chr8	12451885	12452162	12452008	12452022	-	2.95e-05
chr8	12451885	12452162	12451988	12452002	+	0.000805
chr6	84315038	84315329	84315209	84315223	+	0.000136
chr6	84315038	84315329	84315067	84315081	+	0.000968
chr6	84315038	84315329	84315160	84315174	+	1.49e-06
chr4	139805375	139805645	139805599	139805613	+	0.000856
chr4	139805375	139805645	139805487	139805501	+	0.000121
chr4	139805375	139805645	139805611	139805625	-	0.000522
chr14	74261702	74261986	74261854	74261868	-	0.000153
chr14	74261702	74261986	74261787	74261801	-	0.000272
chr14	74261702	74261986	74261795	74261809	+	7.47e-07
chr5	113004562	113004838	113004653	113004667	+	7.46e-06
chr5	113004562	113004838	113004720	113004734	+	0.000301
chr5	113004562	113004838	113004817	113004831	-	0.000649
chr3	27269166	27269448	27269252	27269266	+	0.000506
chr3	27269166	27269448	27269267	27269281	-	2.11e-05
chr3	27269166	27269448	27269357	27269371	-	0.000191
chr7	16810918	16811189	16810959	16810973	+	1.76e-05
chr7	16810918	16811189	16811036	16811050	+	8.98e-08
chr7	16810918	16811189	16811022	16811036	+	9.21e-07
chr11	82328324	82328621	82328440	82328454	+	1.2e-05
chr11	82328324	82328621	82328379	82328393	+	0.000805
chr11	82328324	82328621	82328511	82328525	+	0.000418
chr18	81815069	81815359	81815324	81815338	-	0.000282
chr18	81815069	81815359	81815096	81815110	-	0.000344
chr18	81815069	81815359	81815176	81815190	+	1.96e-06
chr12	33769624	33769895	33769787	33769801	+	0.000344
chr12	33769624	33769895	33769724	33769738	-	1.96e-06
chr12	33769624	33769895	33769757	33769771	+	0.00091
chr3	20011948	20012282	20012106	20012120	-	6.58e-08
chr3	20011948	20012282	20011965	20011979	-	2.47e-07
chr3	20011948	20012282	20012057	20012071	-	0.000221
chr11	82185130	82185410	82185394	82185408	-	8.66e-05
chr11	82185130	82185410	82185187	82185201	-	0.000539
chr11	82185130	82185410	82185271	82185285	-	5.2e-05
chr10	126974061	126974362	126974244	126974258	-	6.3e-05
chr10	126974061	126974362	126974175	126974189	-	1.09e-08
chr10	126974061	126974362	126974336	126974350	+	0.000939
chr11	69370960	69371243	69371219	69371233	+	0.000392
chr11	69370960	69371243	69371074	69371088	-	9.04e-05
chr11	69370960	69371243	69371045	69371059	+	0.000669
chr7	98416352	98416607	98416472	98416486	-	9.25e-09
chr7	98416352	98416607	98416461	98416475	+	0.000574
chr7	98416352	98416607	98416512	98416526	+	0.00061
chr6	83877533	83877779	83877601	83877615	+	1.56e-05
chr6	83877533	83877779	83877627	83877641	+	0.000781
chr6	83877533	83877779	83877728	83877742	-	0.00091
chr5	140454915	140455242	140455045	140455059	+	9.2e-06
chr5	140454915	140455242	140455179	140455193	+	6.92e-05
chr5	140454915	140455242	140455060	140455074	-	0.000272
chr15	71766560	71766801	71766702	71766716	-	0.000805
chr15	71766560	71766801	71766669	71766683	-	2.5e-05
chr15	71766560	71766801	71766754	71766768	-	7.24e-05
chr1	120645324	120645607	120645349	120645363	+	0.000506
chr1	120645324	120645607	120645344	120645358	-	0.00091
chr1	120645324	120645607	120645432	120645446	-	2.2e-07
chr3	9552399	9552656	9552520	9552534	-	5.2e-06
chr3	9552399	9552656	9552508	9552522	+	0.00046
chr3	9552399	9552656	9552622	9552636	-	0.000669
chr11	5916416	5916705	5916543	5916557	-	1.98e-05
chr11	5916416	5916705	5916519	5916533	-	0.000475
chr11	5916416	5916705	5916583	5916597	-	0.000446
chr11	77793854	77794242	77794192	77794206	+	9.04e-05
chr11	77793854	77794242	77793979	77793993	+	2.34e-06
chr11	77793854	77794242	77794001	77794015	+	0.000379
chr7	52621441	52621678	52621583	52621597	+	0.000405
chr7	52621441	52621678	52621563	52621577	-	5.47e-07
chr7	52621441	52621678	52621554	52621568	+	0.000206
chr7	151480258	151480557	151480315	151480329	-	0.000379
chr7	151480258	151480557	151480359	151480373	+	4.05e-05
chr7	151480258	151480557	151480453	151480467	+	0.000968
chr3	87797428	87797723	87797590	87797604	-	2.14e-06
chr3	87797428	87797723	87797663	87797677	-	0.000446
chr3	87797428	87797723	87797657	87797671	-	0.00046
chr10	60377243	60377502	60377331	60377345	+	2.37e-05
chr10	60377243	60377502	60377246	60377260	+	0.000781
chr10	60377243	60377502	60377310	60377324	-	0.000968
[truncated: 2,221 more rows]
